# Supplementary material
Source: PubMed Central journal article supplement (PMC6688905)
Supplement: NIHMS1019604-supplement-Suppl_Figs_and_Tables.pdf [file NIHMS1019604-supplement-Suppl_Figs_and_Tables.pdf]

# Neolymphostin A is a Covalent Phosphoinositide-3-kinase (PI3-K)/Mammalian Target of Rapamycin (mTOR) Dual Inhibitor that Employs an Unusual Electrophilic Vinylogous Ester

Gabriel Castro-Falcón,<sup>1,5</sup> Grant S. Seiler,<sup>1,2,5</sup> Özlem Demir,<sup>2</sup> Manoj K. Rathinaswamy,<sup>3</sup> David Hamelin,<sup>3</sup> Reece M. Hoffmann,<sup>3</sup> Stefanie L. Makowski,<sup>4</sup> Anne-Catrin Letzel,<sup>1</sup> Seth J. Field,<sup>4</sup> John E. Burke,<sup>3</sup> Rommie E. Amaro,<sup>2</sup> Chambers C. Hughes<sup>1\*</sup>

<sup>1</sup>Center for Marine Biotechnology and Biomedicine, Scripps Institution of Oceanography, University of California, San Diego, La Jolla, California, USA, 92093

<sup>2</sup>Department of Chemistry and Biochemistry, University of California, San Diego, La Jolla, California, USA, 92093

<sup>3</sup>Department of Biochemistry and Microbiology, University of Victoria, Victoria, British Columbia, Canada, V8W 2Y2

<sup>4</sup>School of Medicine, University of California, San Diego, La Jolla, California, USA, 92093

<sup>5</sup>These authors contributed equally to this work.

|                                                                                                       | page |
|-------------------------------------------------------------------------------------------------------|------|
| <b>Figure S1.</b> UV chromatogram (254 nm) before and after labeling reaction                         | S4   |
| <b>Figure S2.</b> UV chromatogram (450 nm) before and after labeling reaction                         | S4   |
| <b>Figure S3.</b> MS spectra of neolymphostin A/B–cysteine thiol probe adducts ( <b>2a/2b/3a/3b</b> ) | S5   |
| <b>Table S1.</b> NMR spectral data for neolymphostin A-cysteine thiol probe adduct ( <b>2a</b> )      | S6   |
| <sup>1</sup> H NMR (500 MHz, DMSO- <i>d</i> <sub>6</sub> )                                            | S7   |
| <b>Table S2.</b> NMR spectral data for neolymphostin A-cysteine thiol probe adduct ( <b>2b</b> )      | S8   |
| <sup>1</sup> H NMR (500 MHz, DMSO- <i>d</i> <sub>6</sub> )                                            | S9   |
| COSY (500 MHz, DMSO- <i>d</i> <sub>6</sub> )                                                          | S10  |
| HSQC (500 MHz, DMSO- <i>d</i> <sub>6</sub> )                                                          | S11  |
| HMBC (500 MHz, DMSO- <i>d</i> <sub>6</sub> )                                                          | S12  |
| <b>Table S3.</b> NMR spectral data for neolymphostin B-cysteine thiol probe adduct ( <b>3a</b> )      | S13  |
| <sup>1</sup> H NMR (500 MHz, DMSO- <i>d</i> <sub>6</sub> )                                            | S14  |
| <b>Table S4.</b> NMR spectral data for neolymphostin B-cysteine thiol probe adduct ( <b>3b</b> )      | S15  |
| <sup>1</sup> H NMR (500 MHz, DMSO- <i>d</i> <sub>6</sub> )                                            | S16  |
| COSY (500 MHz, DMSO- <i>d</i> <sub>6</sub> )                                                          | S17  |
| HSQC (500 MHz, DMSO- <i>d</i> <sub>6</sub> )                                                          | S18  |
| HMBC (500 MHz, DMSO- <i>d</i> <sub>6</sub> )                                                          | S19  |
| <sup>1</sup> H NMR (500 MHz, DMSO- <i>d</i> <sub>6</sub> ) of neolymphostin A ( <b>4</b> )            | S20  |
| HPLC chromatogram of neolymphostin A ( <b>4</b> )                                                     | S21  |

|                                                                                                                                           |     |
|-------------------------------------------------------------------------------------------------------------------------------------------|-----|
| Description of KINOMEscan                                                                                                                 | S22 |
| <b>Table S5.</b> Dissociation constants ( $K_d$ ) for neolymphostin A and selected kinases                                                | S24 |
| Curve images for dissociation constants ( $K_d$ ) for neolymphostin A and selected kinases                                                | S25 |
| <b>Table S6.</b> Dissociation constants ( $K_d$ ) for wortmannin and selected kinases                                                     | S26 |
| $^1\text{H}$ NMR (500 MHz, phosphate-buffered $\text{D}_2\text{O}$ ) of <b>6</b>                                                          | S27 |
| <b>Figure S4a.</b> $^1\text{H}$ NMR kinetics data for <b>6</b> reacting with glutathione, pH 7.4, 25°C                                    | S28 |
| Stacked $^1\text{H}$ NMR spectra of <b>6</b> reacting with GSH, pH 7.4, 25°C                                                              | S29 |
| <b>Figure S4b.</b> $^1\text{H}$ NMR kinetics data for <b>6</b> reacting with glutathione, pH 7.4, 37°C                                    | S30 |
| Stacked $^1\text{H}$ NMR spectra of <b>6</b> reacting with GSH, pH 7.4, 37°C                                                              | S31 |
| <b>Table S7.</b> Dissociation constants ( $K_d$ ) for neolymphostin A and selected kinases under four conditioning experiments (Arms A–D) | S32 |
| Curve images for dissociation constants ( $K_d$ ) for neolymphostin A and selected kinases under four conditioning experiments (Arms A–D) | S33 |
| <b>Figure S5.</b> Timecourse for covalent modification of PI3K                                                                            | S35 |
| <b>Figure S6.</b> Neolymphostin docked into PI3K $\alpha$                                                                                 | S35 |
| <b>Figure S7.</b> Neolymphostin docked into mTOR                                                                                          | S36 |
| <b>Figure S8.</b> Neolymphostin docked into PI3K $\alpha$ (induced fit)                                                                   | S37 |
| <b>Figure S9.</b> Neolymphostin docked into mTOR (induced fit)                                                                            | S38 |
| <b>Figure S10.</b> Neolymphostin docked into PI3K $\alpha$ (covalent model)                                                               | S39 |
| <b>Table S8.</b> HDX-MS data                                                                                                              | S40 |
| <b>Figure S11.</b> $^1\text{H}$ NMR kinetics data for <b>6</b> reacting with $\text{N}^\alpha$ -acetyl lysine, pH 8.1, 25°C               | S41 |
| Stacked $^1\text{H}$ NMR spectra of <b>6</b> reacting with $\text{N}^\alpha$ -acetyl lysine, pH 8.1, 25°C                                 | S42 |
| <b>Table S9.</b> NMR spectral data for <b>8</b>                                                                                           | S43 |
| $^1\text{H}$ NMR (500 MHz, phosphate-buffered $\text{D}_2\text{O}$ )                                                                      | S44 |
| COSY (500 MHz, phosphate-buffered $\text{D}_2\text{O}$ )                                                                                  | S45 |
| HSQC (500 MHz, phosphate-buffered $\text{D}_2\text{O}$ )                                                                                  | S46 |
| HMBC (500 MHz, phosphate-buffered $\text{D}_2\text{O}$ )                                                                                  | S47 |
| $^1\text{H}$ NMR (500 MHz, phosphate-buffered $\text{D}_2\text{O}$ ) of <b>6</b> and hydrolysis product <b>9</b>                          | S48 |
| <b>Table S10.</b> Results of competition binding assay for neolymphostin against a panel of 97 kinases                                    | S49 |

|                                                                                     |     |
|-------------------------------------------------------------------------------------|-----|
| <b>Figure S12.</b> TREEspot™ interaction map for neolymphostin A @ 1000nM           | S51 |
| <b>Table S11.</b> Selectivity S-Score for neolymphostin A against a 97 kinase panel | S52 |
| <b>Figure S13.</b> NCI 60-cell line dose response curves for neolymphostin A        | S53 |
| <b>Figure S14.</b> NCI 60-cell line testing results for neolymphostin A             | S54 |
| <b>Figure S15.</b> NCI 60-cell line mean graphs for neolymphostin A                 | S55 |
| <b>Figure S16.</b> NCI 60-cell line dose response curves for neolymphostin A (all)  | S56 |
| <b>Figure S17.</b> COMPARE results                                                  | S57 |

**Figure S1.** HPLC chromatogram (450 nm) before and after labeling reaction

C18(2) Phenomenex Luna, 100 x 4.6 mm, 5  $\mu$ , 100  $\text{\AA}$   
10-100% CH<sub>3</sub>CN in water (0.1% FA) over 20 min, 0.7 mL min<sup>-1</sup>

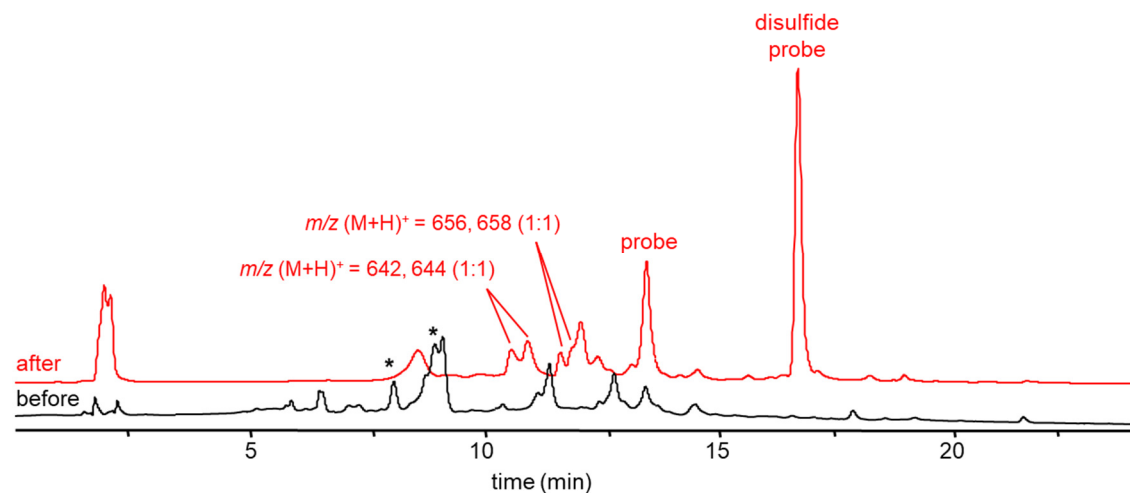

**Figure S2.** HPLC chromatogram (450 nm) before and after labeling reaction

C18(2) Phenomenex Luna, 100 x 4.6 mm, 5  $\mu$ , 100  $\text{\AA}$   
10-100% CH<sub>3</sub>CN in water (0.1% FA) over 20 min, 0.7 mL min<sup>-1</sup>

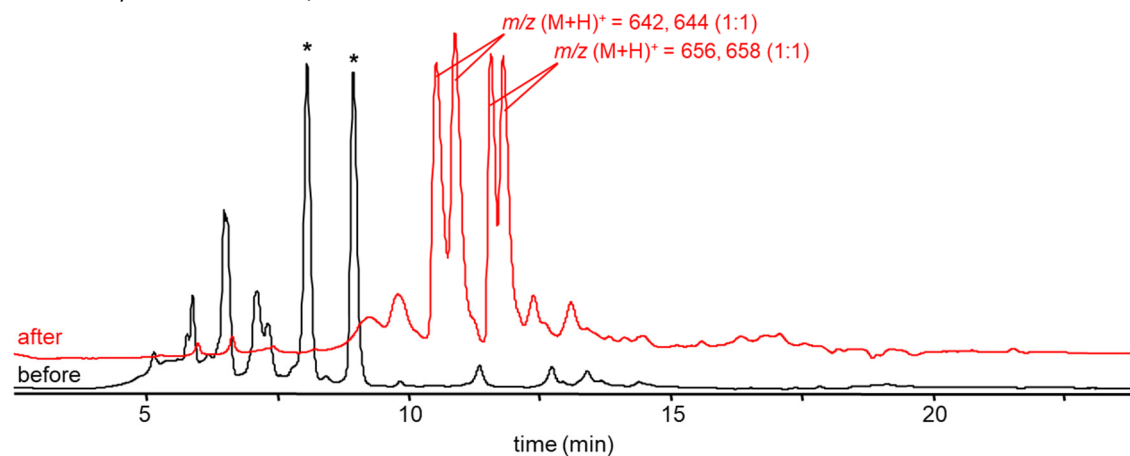

Asterisks (\*) signal neolymphostin A (8.96 min) and neolymphostin B (8.08 min)

**Figure S3.** MS spectra of neolymphostin A/B–cysteine thiol probe adducts (**2a/2b/3a/3b**)

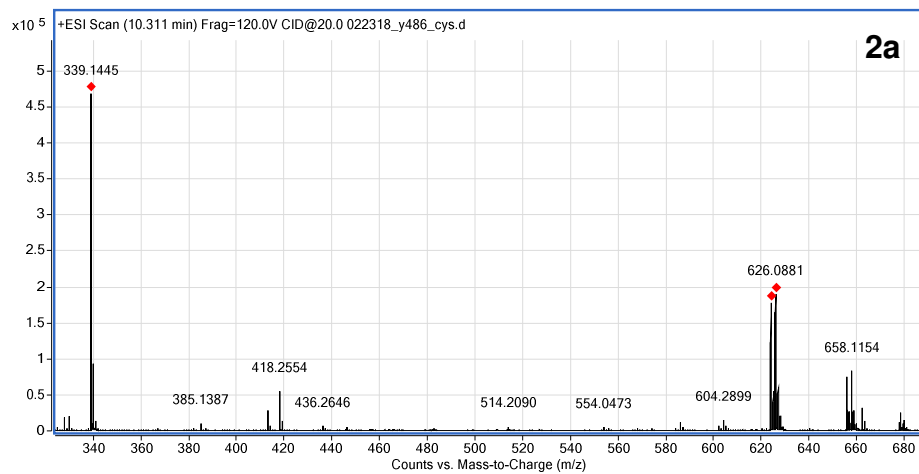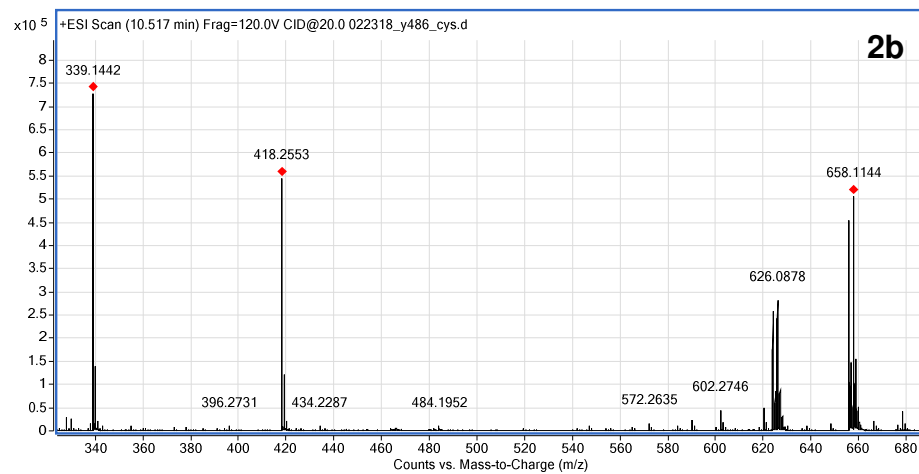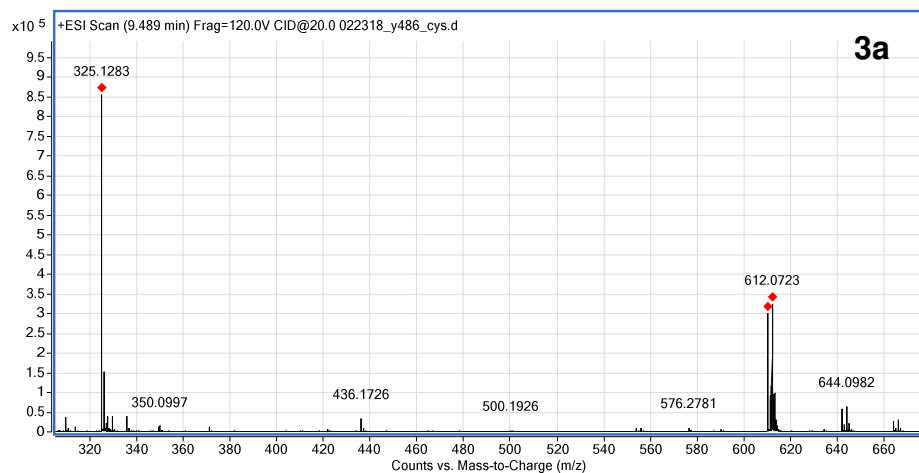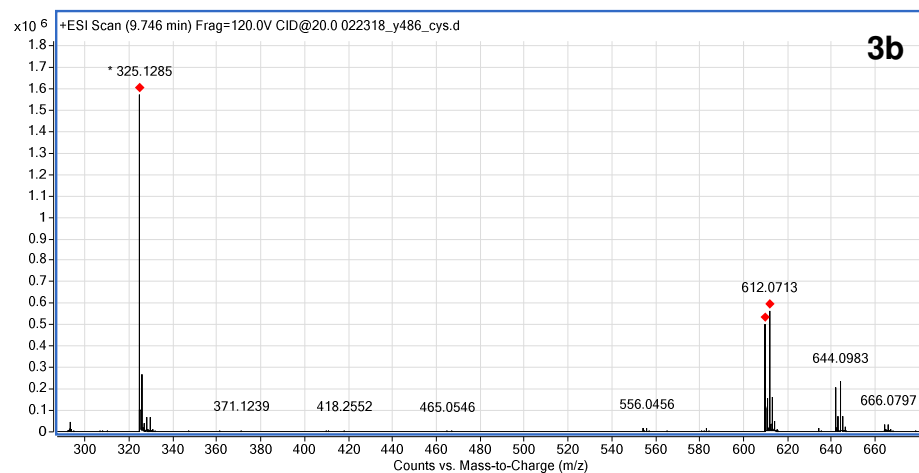

**Table S1.** NMR spectral data for neolymphostin A–cysteine thiol probe adduct (**2a**) in DMSO-*d*<sub>6</sub> at 500 MHz

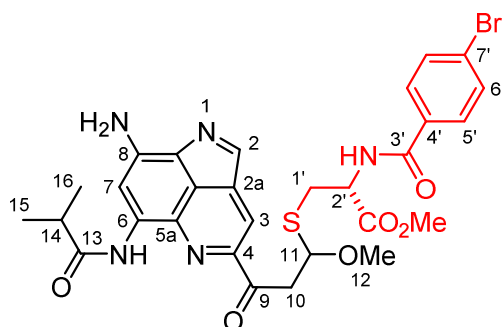

diastereomer #1

| Position # <sup>a</sup> | $\delta_{\text{H}}$ (mult., (J(Hz)))             |
|-------------------------|--------------------------------------------------|
| 1                       | ----                                             |
| 2                       | 8.33 (s)                                         |
| 2a                      | ----                                             |
| 3                       | 8.47 (s)                                         |
| 4                       | ----                                             |
| 5a                      | ----                                             |
| 6                       | ----                                             |
| 6-NH                    | 9.82 (s)                                         |
| 7                       | 8.04 (s)                                         |
| 8                       | ----                                             |
| 8a                      | ----                                             |
| 8b                      | ----                                             |
| 9                       | ----                                             |
| 10                      | a 3.78 (dd, 16.2, 5.6)<br>b 4.12 (dd, 16.2, 8.0) |
| 11                      | 5.17 (dd, 7.8, 5.7)                              |
| 12                      | 3.27 (s)                                         |
| 13                      | ----                                             |
| 14                      | 2.92 (sept., 6.9)                                |
| 15                      | 1.14 (d, 6.8)                                    |
| 16                      | 1.13 (d, 6.8)                                    |
| 1'                      | a 3.02 (dd, 13.7, 9.4)<br>b 3.20 (dd, 13.7, 5.1) |
| 2'                      | 4.65 (m)                                         |
| 2'-NH                   | 8.93 (d, 7.8)                                    |
| 3'                      | ----                                             |
| 4'                      | ----                                             |
| 5'                      | 7.70 (d, 8.5)                                    |
| 6'                      | 7.59 (d, 8.5)                                    |
| 7'                      | ----                                             |
| 8'                      | ----                                             |
| 9'                      | 3.61 (s)                                         |

<sup>a</sup> Position numbering based on Aotani, et al. *J. Antibiot.* **1997**, *50*, 543–545.

<sup>1</sup>H NMR (500 MHz, DMSO-d<sub>6</sub>) of neolymphostin A–cysteine thiol probe adduct (**2a**)

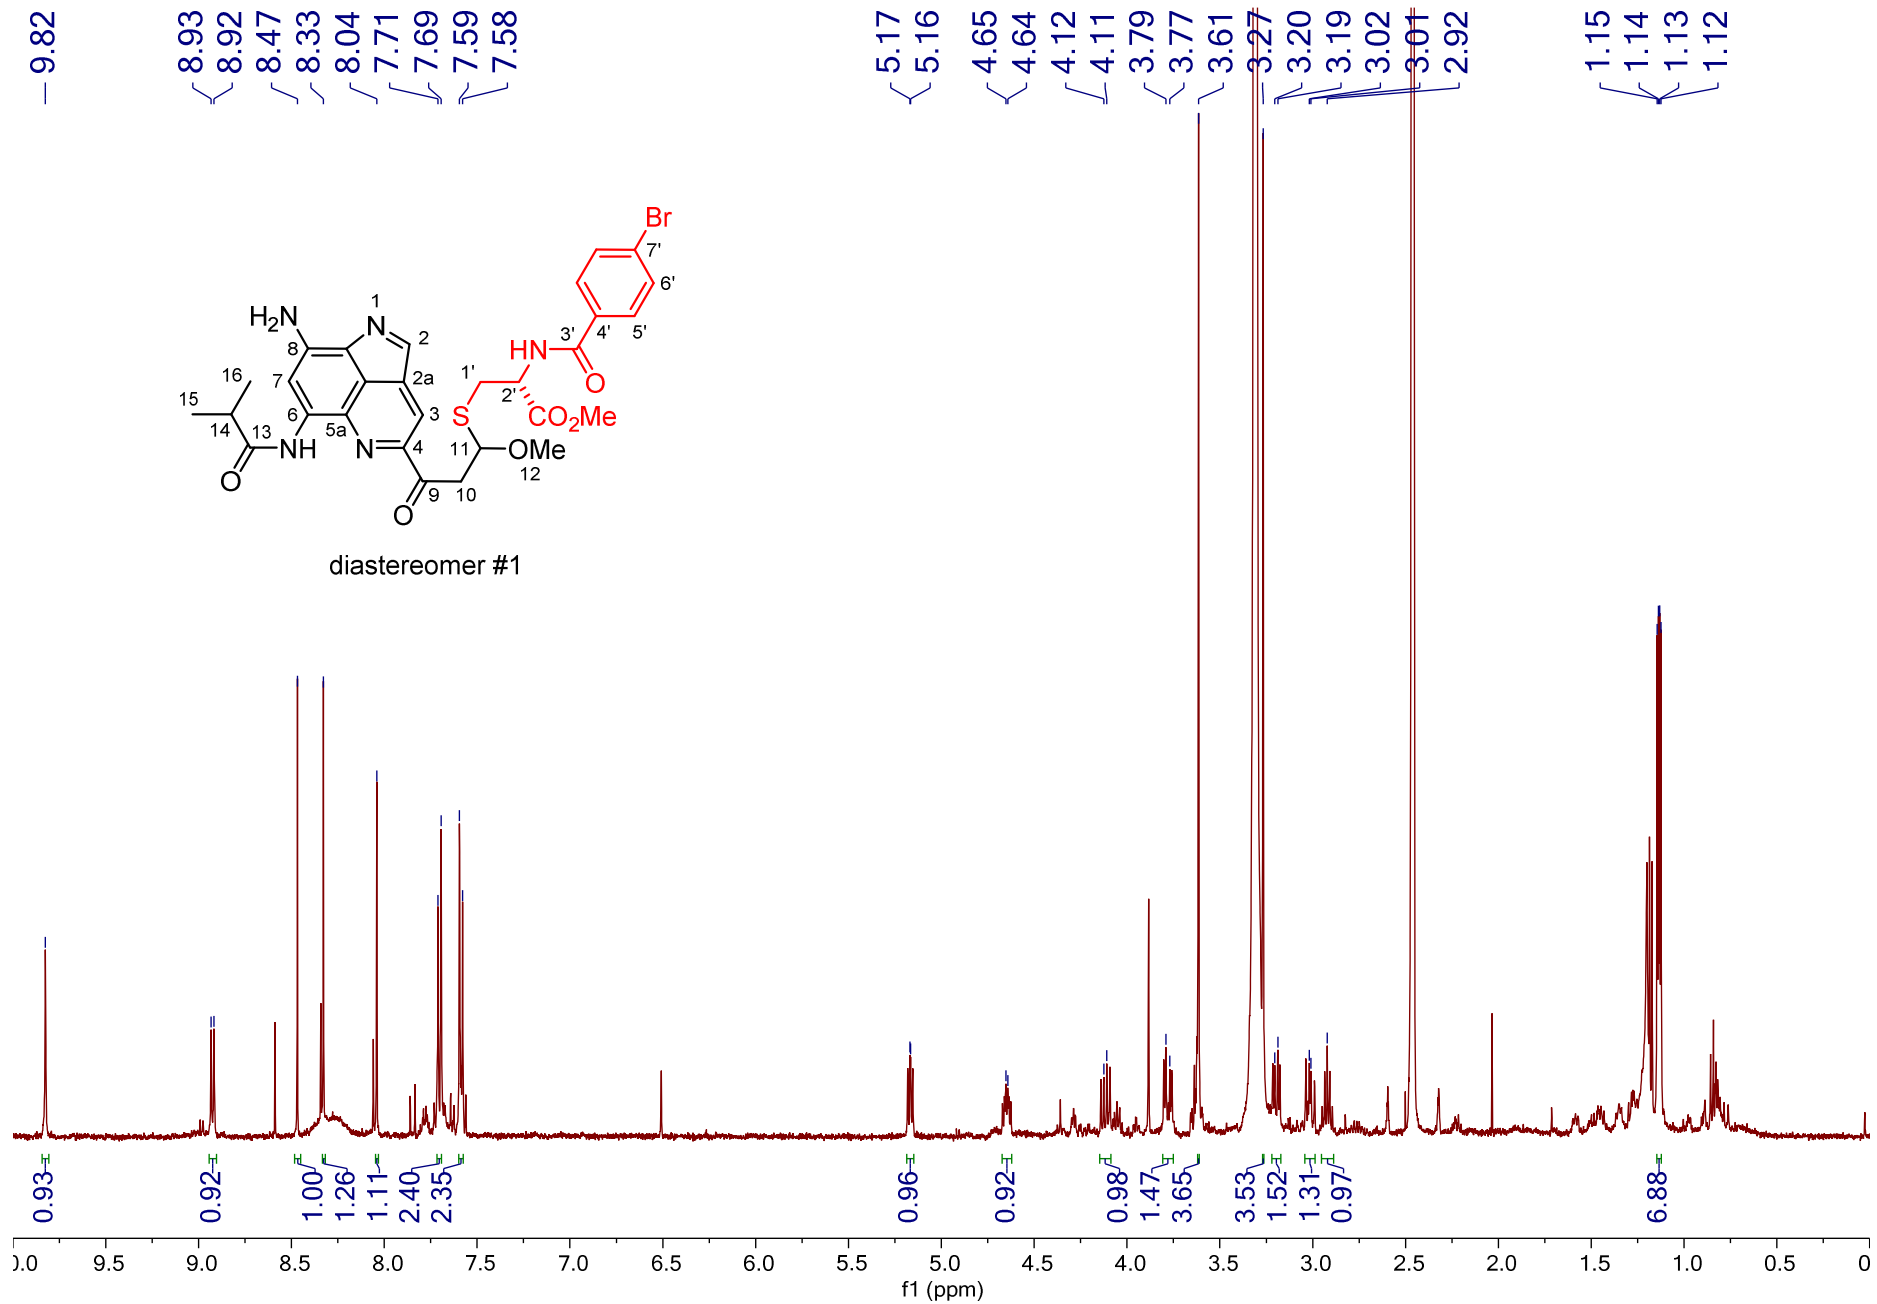

**Table S2.** NMR spectral data for neolymphostin A–cysteine thiol probe adduct (**2b**) in DMSO-*d*<sub>6</sub> at 500 MHz

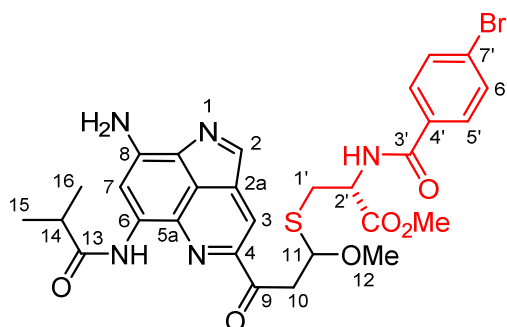

diastereomer #2

| Position # <sup>a</sup> | $\delta_{\text{H}}$ (mult., <i>J</i> (Hz))       | $\delta_{\text{C}}$ <sup>b</sup> | COSY               | HMBC             |
|-------------------------|--------------------------------------------------|----------------------------------|--------------------|------------------|
| 1                       | ----                                             | ----                             | ----               | ----             |
| 2                       | 8.37 (s)                                         | 145.8                            | ----               | 2a, 8b           |
| 2a                      | ----                                             | 136.6                            | ----               | ----             |
| 3                       | 8.51 (s)                                         | 117.6                            | ----               | 4, 8b            |
| 4                       | ----                                             | 146.2                            | ----               | ----             |
| 5a                      | ----                                             | 133.7                            | ----               | ----             |
| 6                       | ----                                             | 139.5                            | ----               | ----             |
| 6-NH                    | 9.87 (s)                                         | ----                             | ----               | 5a, 7, 13        |
| 7                       | 8.09 (s)                                         | 111.0                            | ----               | 5a, 6, 8a        |
| 8                       | ----                                             | n.d. <sup>c</sup>                | ----               | ----             |
| 8a                      | ----                                             | 124.6                            | ----               | ----             |
| 8b                      | ----                                             | 124.8                            | ----               | ----             |
| 9                       | ----                                             | 197.0                            | ----               | ----             |
| 10                      | a 3.81 (dd, 16.5, 5.1)<br>b 4.13 (dd, 16.5, 8.1) | 44.4                             | 10b, 11<br>10a, 11 | 9, 11<br>9, 11   |
| 11                      | 5.22 (dd, 8.0, 5.1)                              | 83.4                             | 10a, 10b           | 12               |
| 12                      | 3.31 (s)                                         | 54.8                             | ----               | 11               |
| 13                      | ----                                             | 176.1                            | ----               | ----             |
| 14                      | 2.96 (sept., 6.9)                                | 35.1                             | 15, 16             | 13, 15, 16       |
| 15                      | 1.16 (d, 6.6)                                    | 19.3                             | 14                 | 13, 14, 16       |
| 16                      | 1.16 (d, 6.6)                                    | 19.3                             | 14                 | 13, 14, 15       |
| 1'                      | a 3.06 (dd, 13.7, 9.2)<br>b 3.21 (dd, 13.7, 5.3) | 29.5                             | 1'b, 2'<br>1'a, 2' | 11, 8'<br>11, 8' |
| 2'                      | 4.73 (m)                                         | 53.2                             | 1'a, 1'b, 2'-NH    | 8'               |
| 2'-NH                   | 9.01 (d, 7.8)                                    | ----                             | 2'                 | 1', 3'           |
| 3'                      | ----                                             | 165.7                            | ----               | ----             |
| 4'                      | ----                                             | 132.6                            | ----               | ----             |
| 5'                      | 7.77 (d, 8.6)                                    | 129.4                            | 6'                 | 3', 7'           |
| 6'                      | 7.64 (d, 8.6)                                    | 131.3                            | 5'                 | 4', 7'           |
| 7'                      | ----                                             | 125.2                            | ----               | ----             |
| 8'                      | ----                                             | 171.1                            | ----               | ----             |
| 9'                      | 3.65 (s)                                         | 52.0                             | ----               | 8'               |

<sup>a</sup> Position numbering based on Aotani, et al. *J. Antibiot.* **1997**, *50*, 543–545.

<sup>b</sup> Carbon chemical shifts were based on HSQC and HMBC data

<sup>c</sup> n.d. = not determined



<sup>1</sup>H NMR (500 MHz, DMSO-*d*<sub>6</sub>) of neolymphostin A–cysteine thiol probe adduct (**2b**)

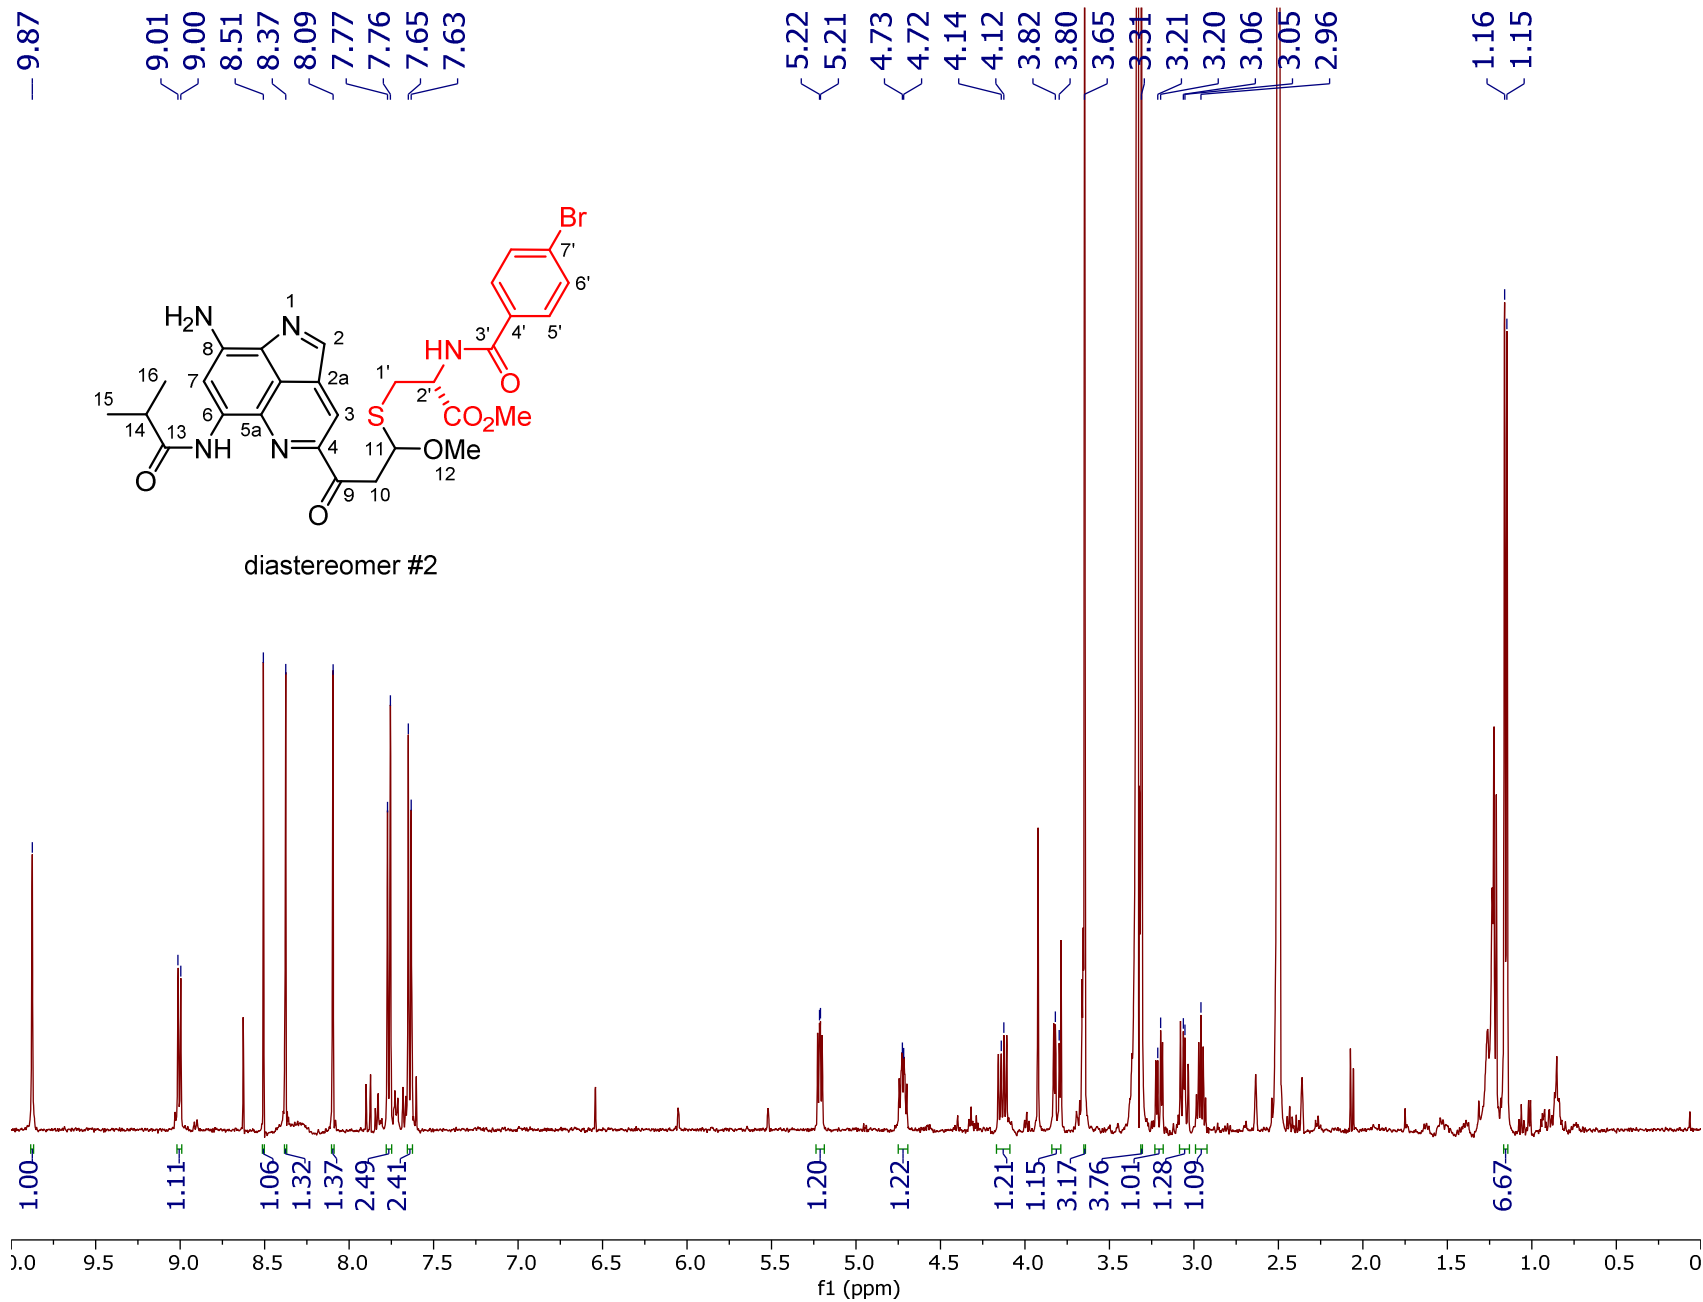

COSY (500 MHz, DMSO-*d*<sub>6</sub>) of neolymphostin A–cysteine thiol probe adduct (**2b**)

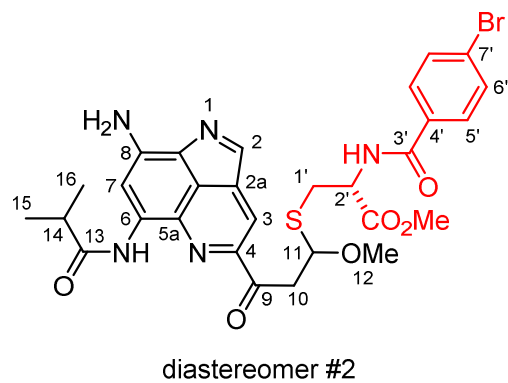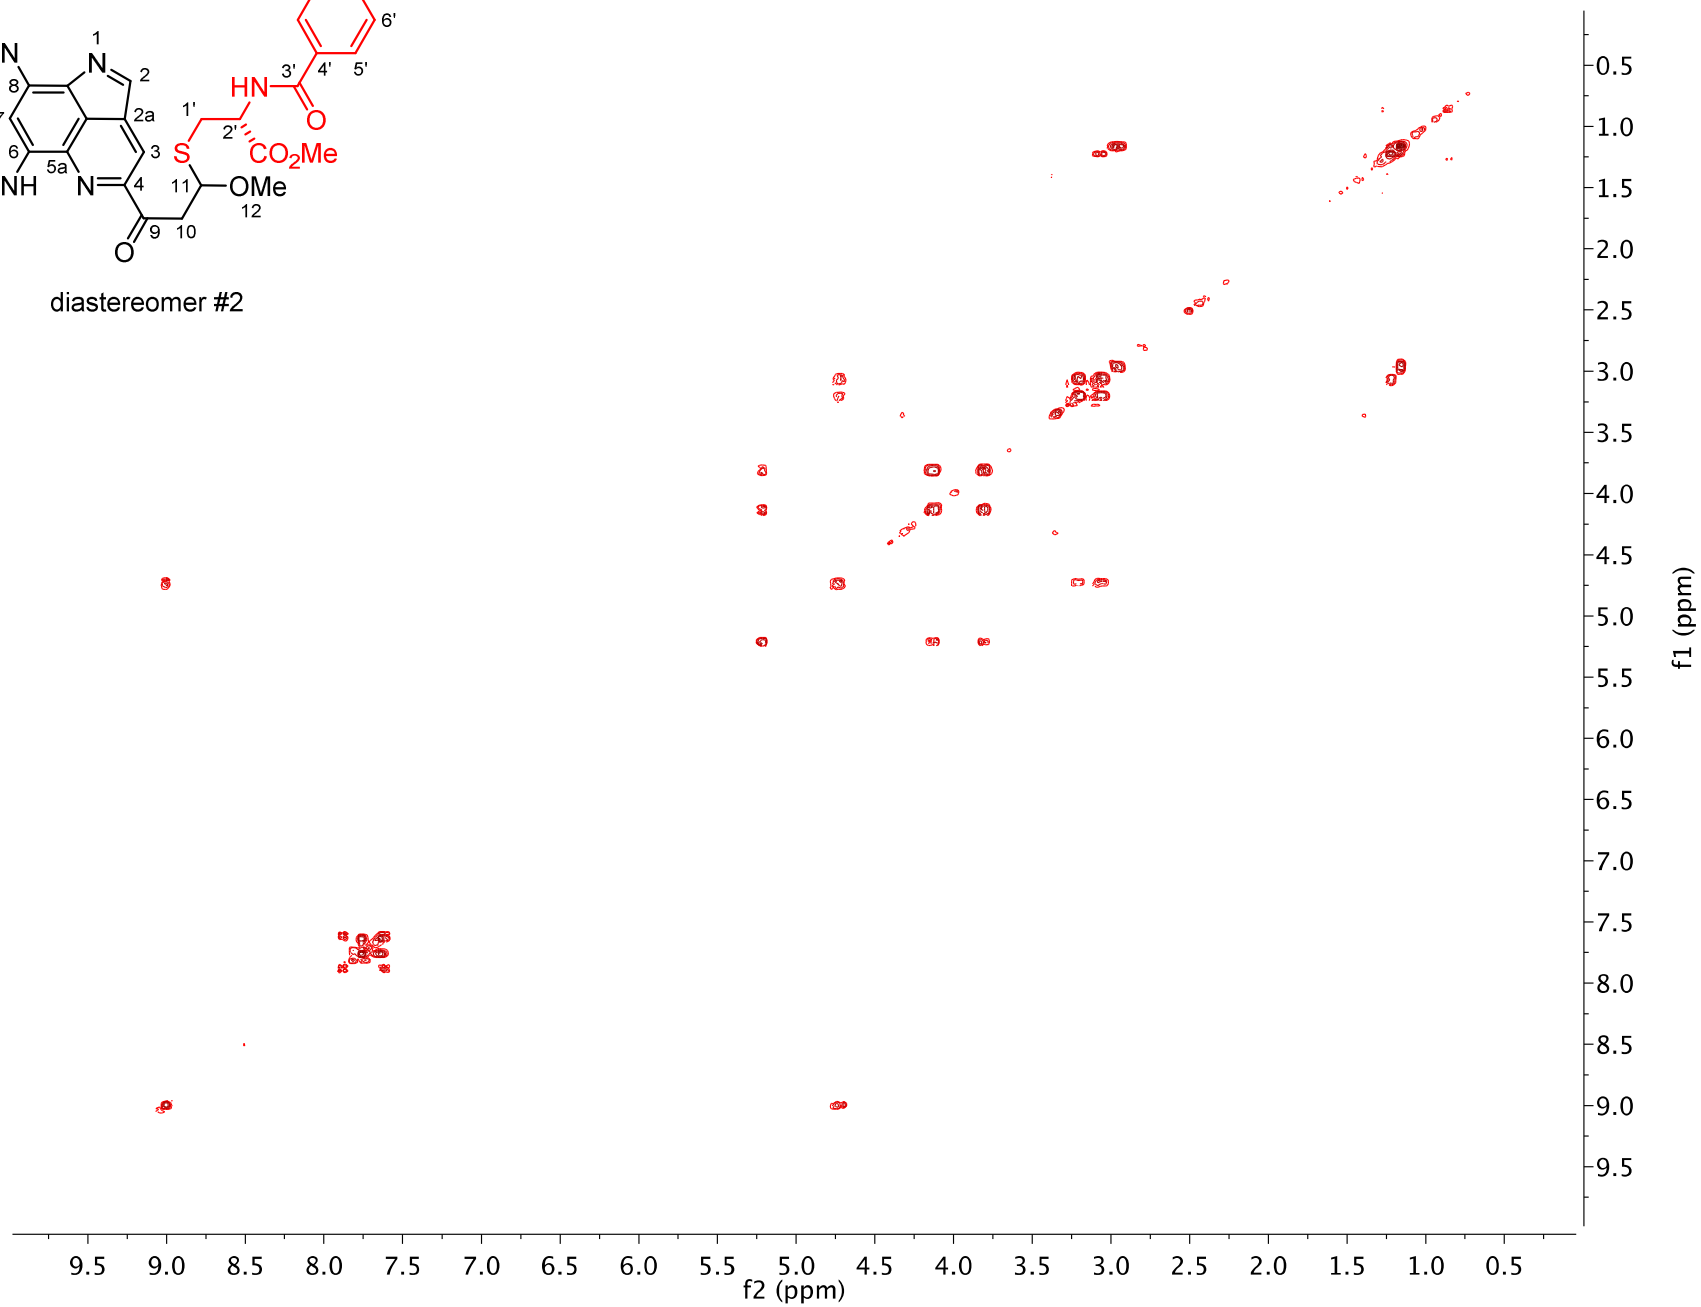

HSQC (500 MHz, DMSO-*d*<sub>6</sub>) of neolymphostin A–cysteine thiol probe adduct (**2b**)

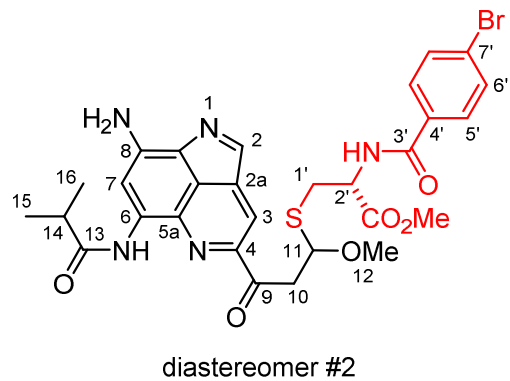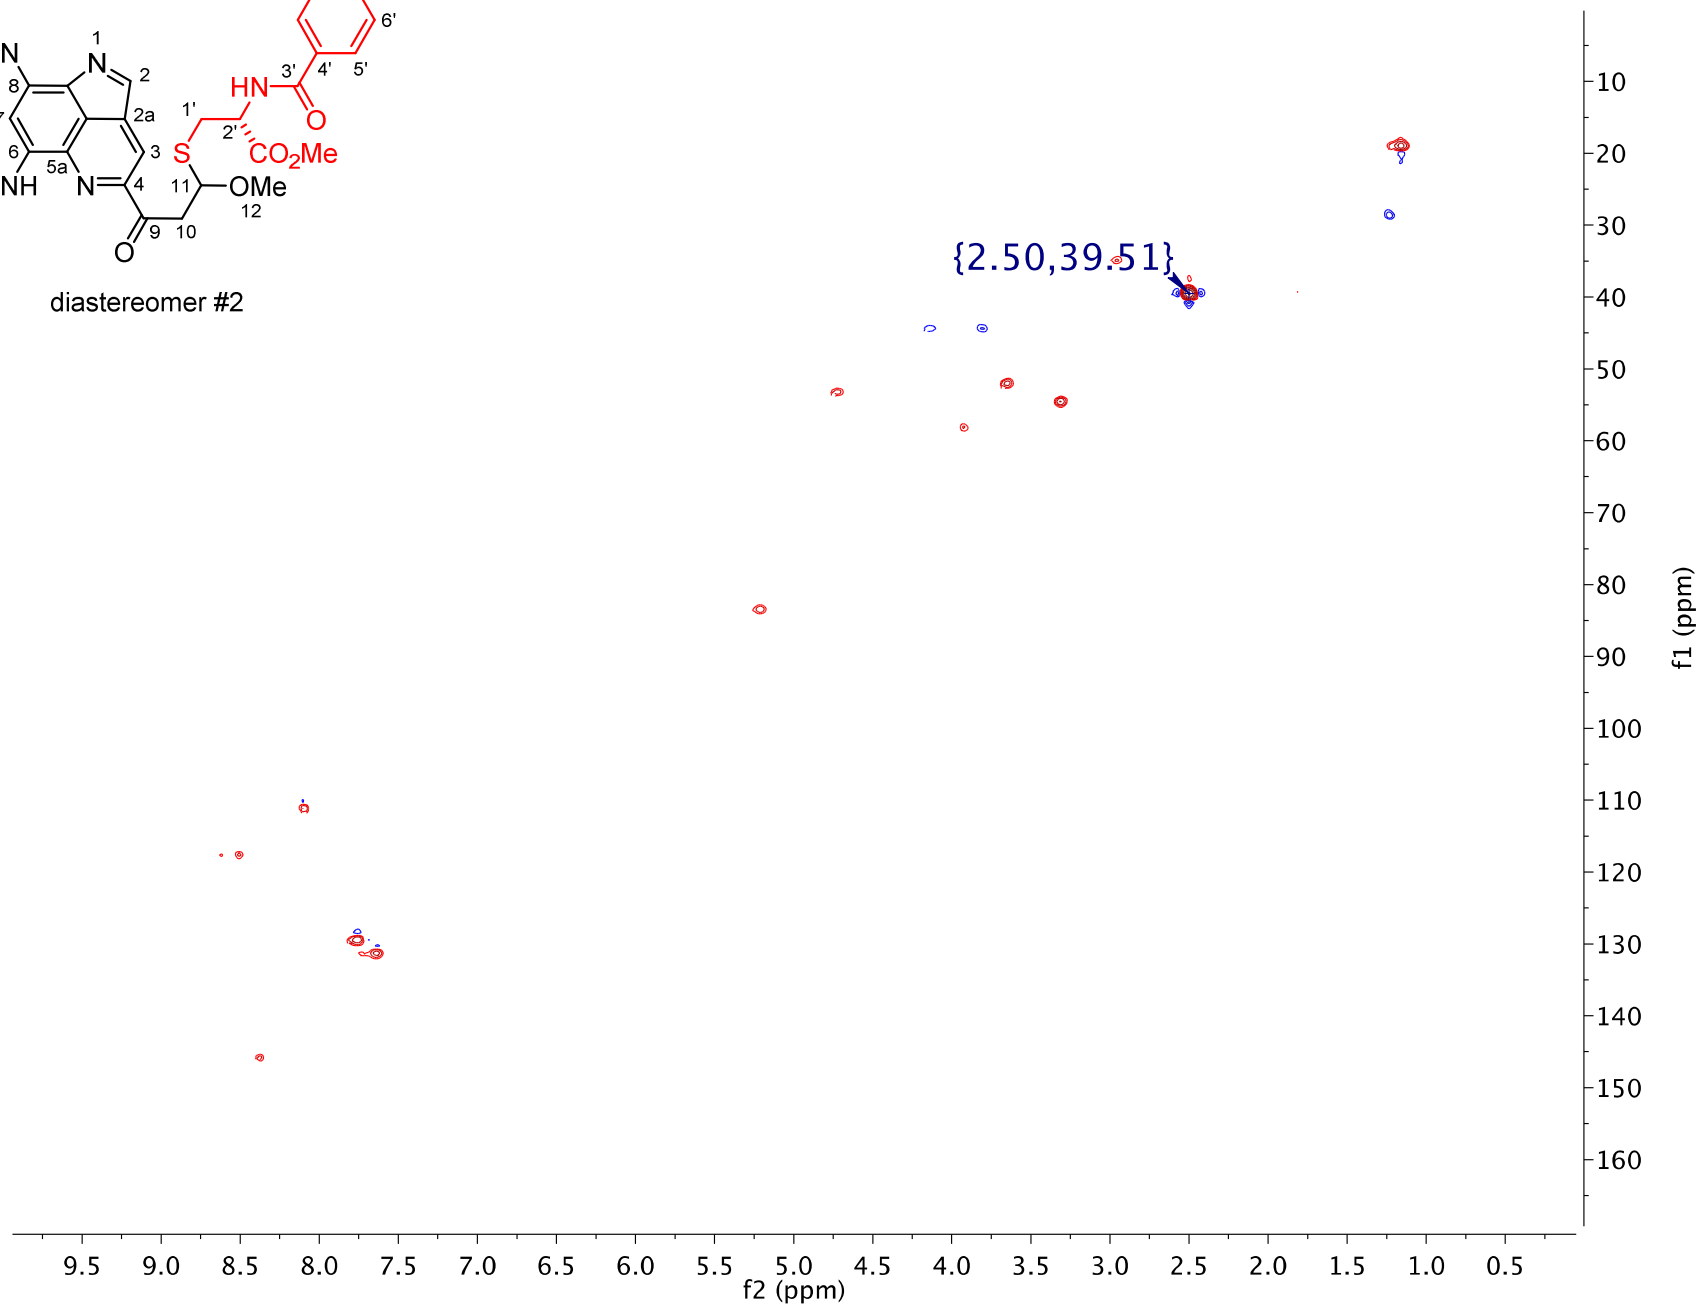

HMBC (500 MHz, DMSO-*d*<sub>6</sub>) of neolymphostin A–cysteine thiol probe adduct (**2b**)

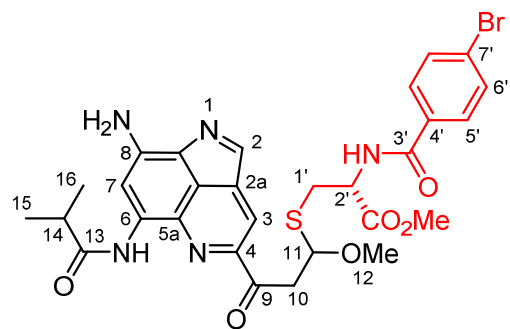

diastereomer #2

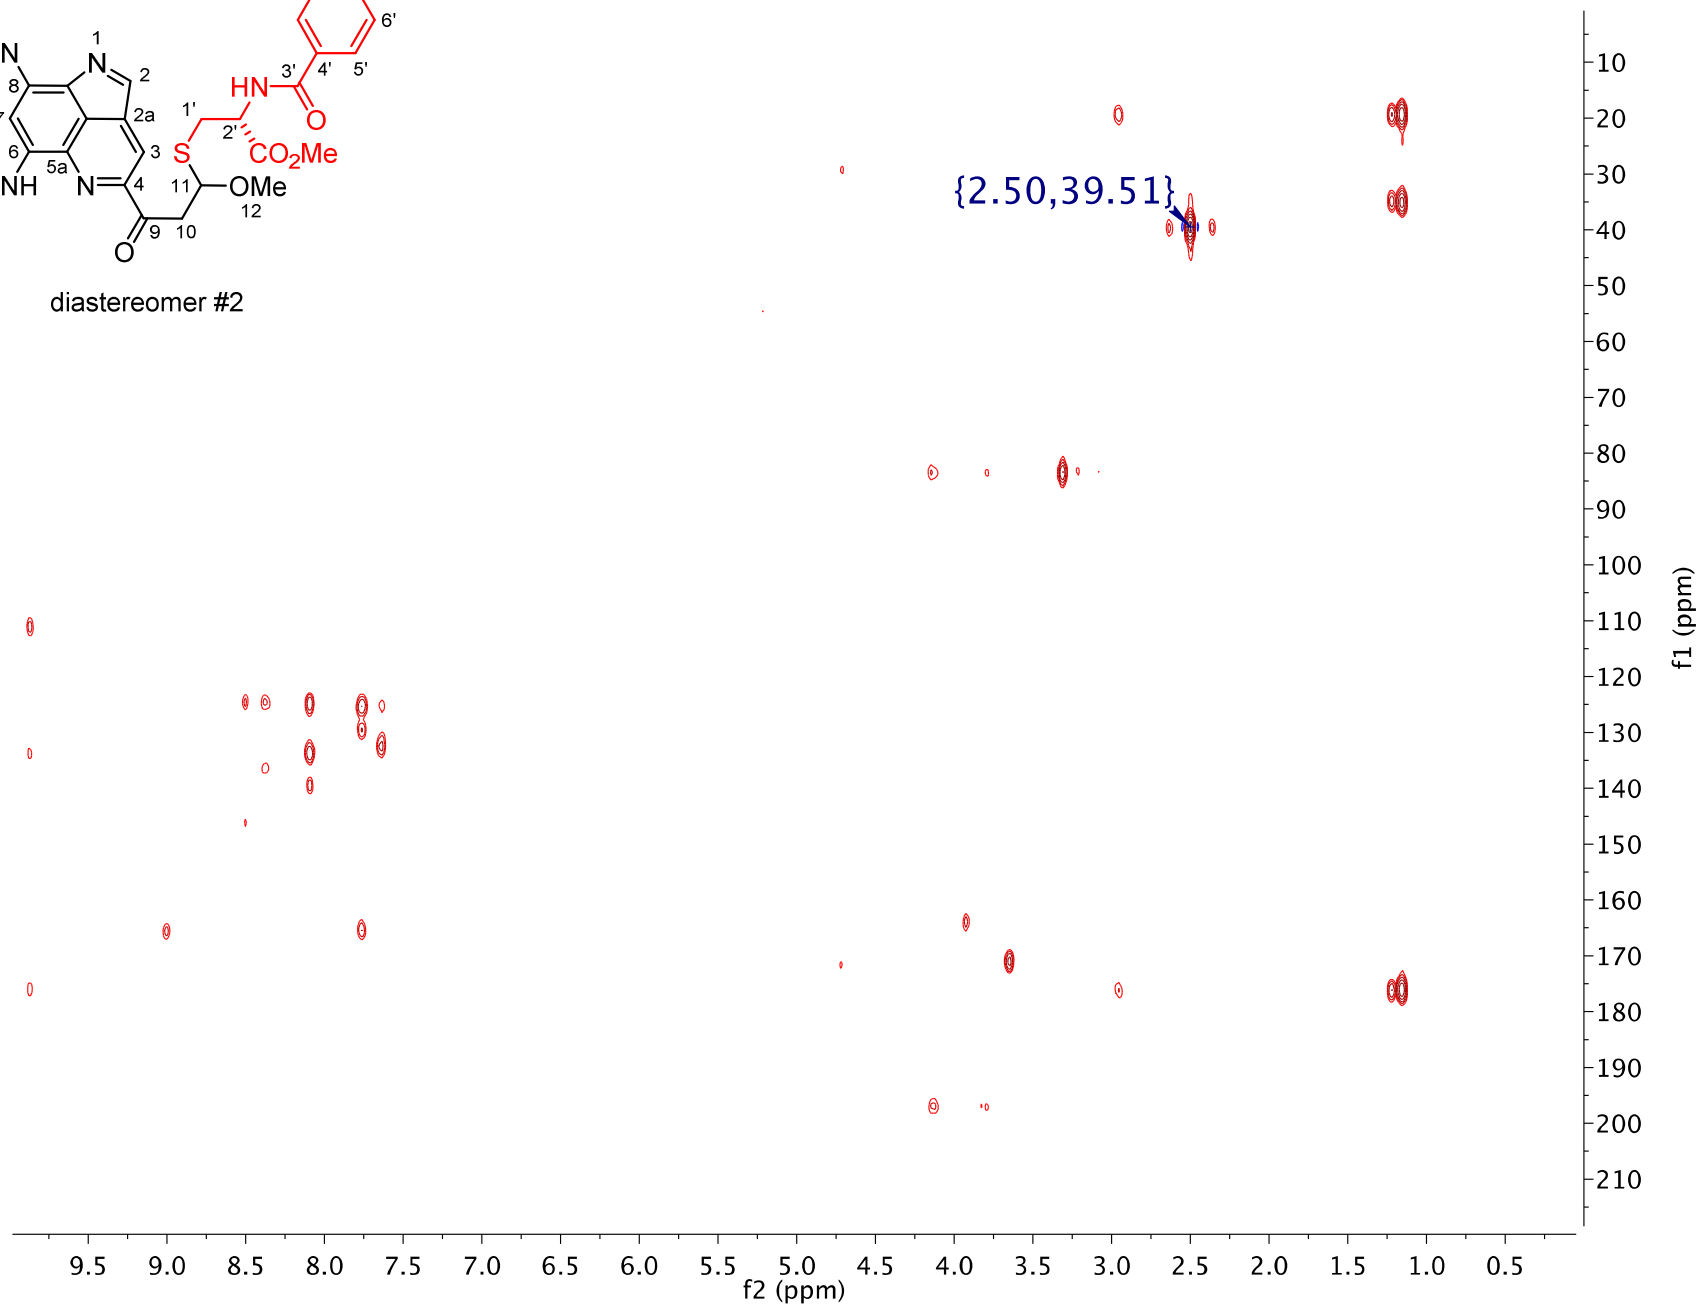

**Table S3.** NMR spectral data for neolymphostin B–cysteine thiol probe adduct (**3a**) in DMSO-*d*<sub>6</sub> at 500 MHz

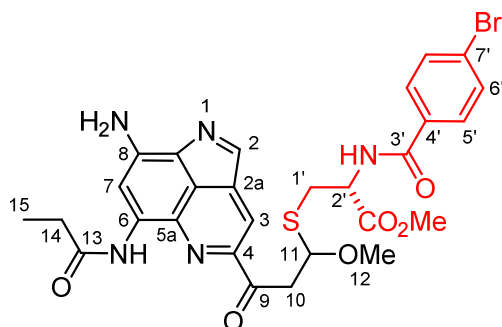

diastereomer #1

| Position # <sup>a</sup> | $\delta_{\text{H}}$ (mult., (J(Hz)))             |
|-------------------------|--------------------------------------------------|
| 1                       | ----                                             |
| 2                       | 8.36 (s)                                         |
| 2a                      | ----                                             |
| 3                       | 8.51 (s)                                         |
| 4                       | ----                                             |
| 5a                      | ----                                             |
| 6                       | ----                                             |
| 6-NH                    | 9.90 (s)                                         |
| 7                       | 8.12 (s)                                         |
| 8                       | ----                                             |
| 8a                      | ----                                             |
| 8b                      | ----                                             |
| 9                       | ----                                             |
| 10                      | a 3.83 (dd, 16.2, 5.6)<br>b 4.19 (dd, 16.2, 7.8) |
| 11                      | 5.18 (dd, 7.6, 5.7)                              |
| 12                      | 3.31 (s)                                         |
| 13                      | ----                                             |
| 14                      | 2.60 (q, 7.5)                                    |
| 15                      | 1.12 (t, 7.4)                                    |
| 1'                      | a 3.07 (dd, 13.7, 9.3)<br>b 3.27 (dd, 13.7, 5.3) |
| 2'                      | 4.71 (m)                                         |
| 2'-NH                   | 8.96 (d, 7.8)                                    |
| 3'                      | ----                                             |
| 4'                      | ----                                             |
| 5'                      | 7.74 (d, 8.5)                                    |
| 6'                      | 7.61 (d, 8.5)                                    |
| 7'                      | ----                                             |
| 8'                      | ----                                             |
| 9'                      | 3.65 (s)                                         |

<sup>a</sup> Position numbering based on Aotani, et al. *J. Antibiot.* **1997**, *50*, 543–545.

$^1\text{H}$  NMR (500 MHz,  $\text{DMSO-}d_6$ ) of neolymphostin B–cysteine thiol probe adduct (**3a**)

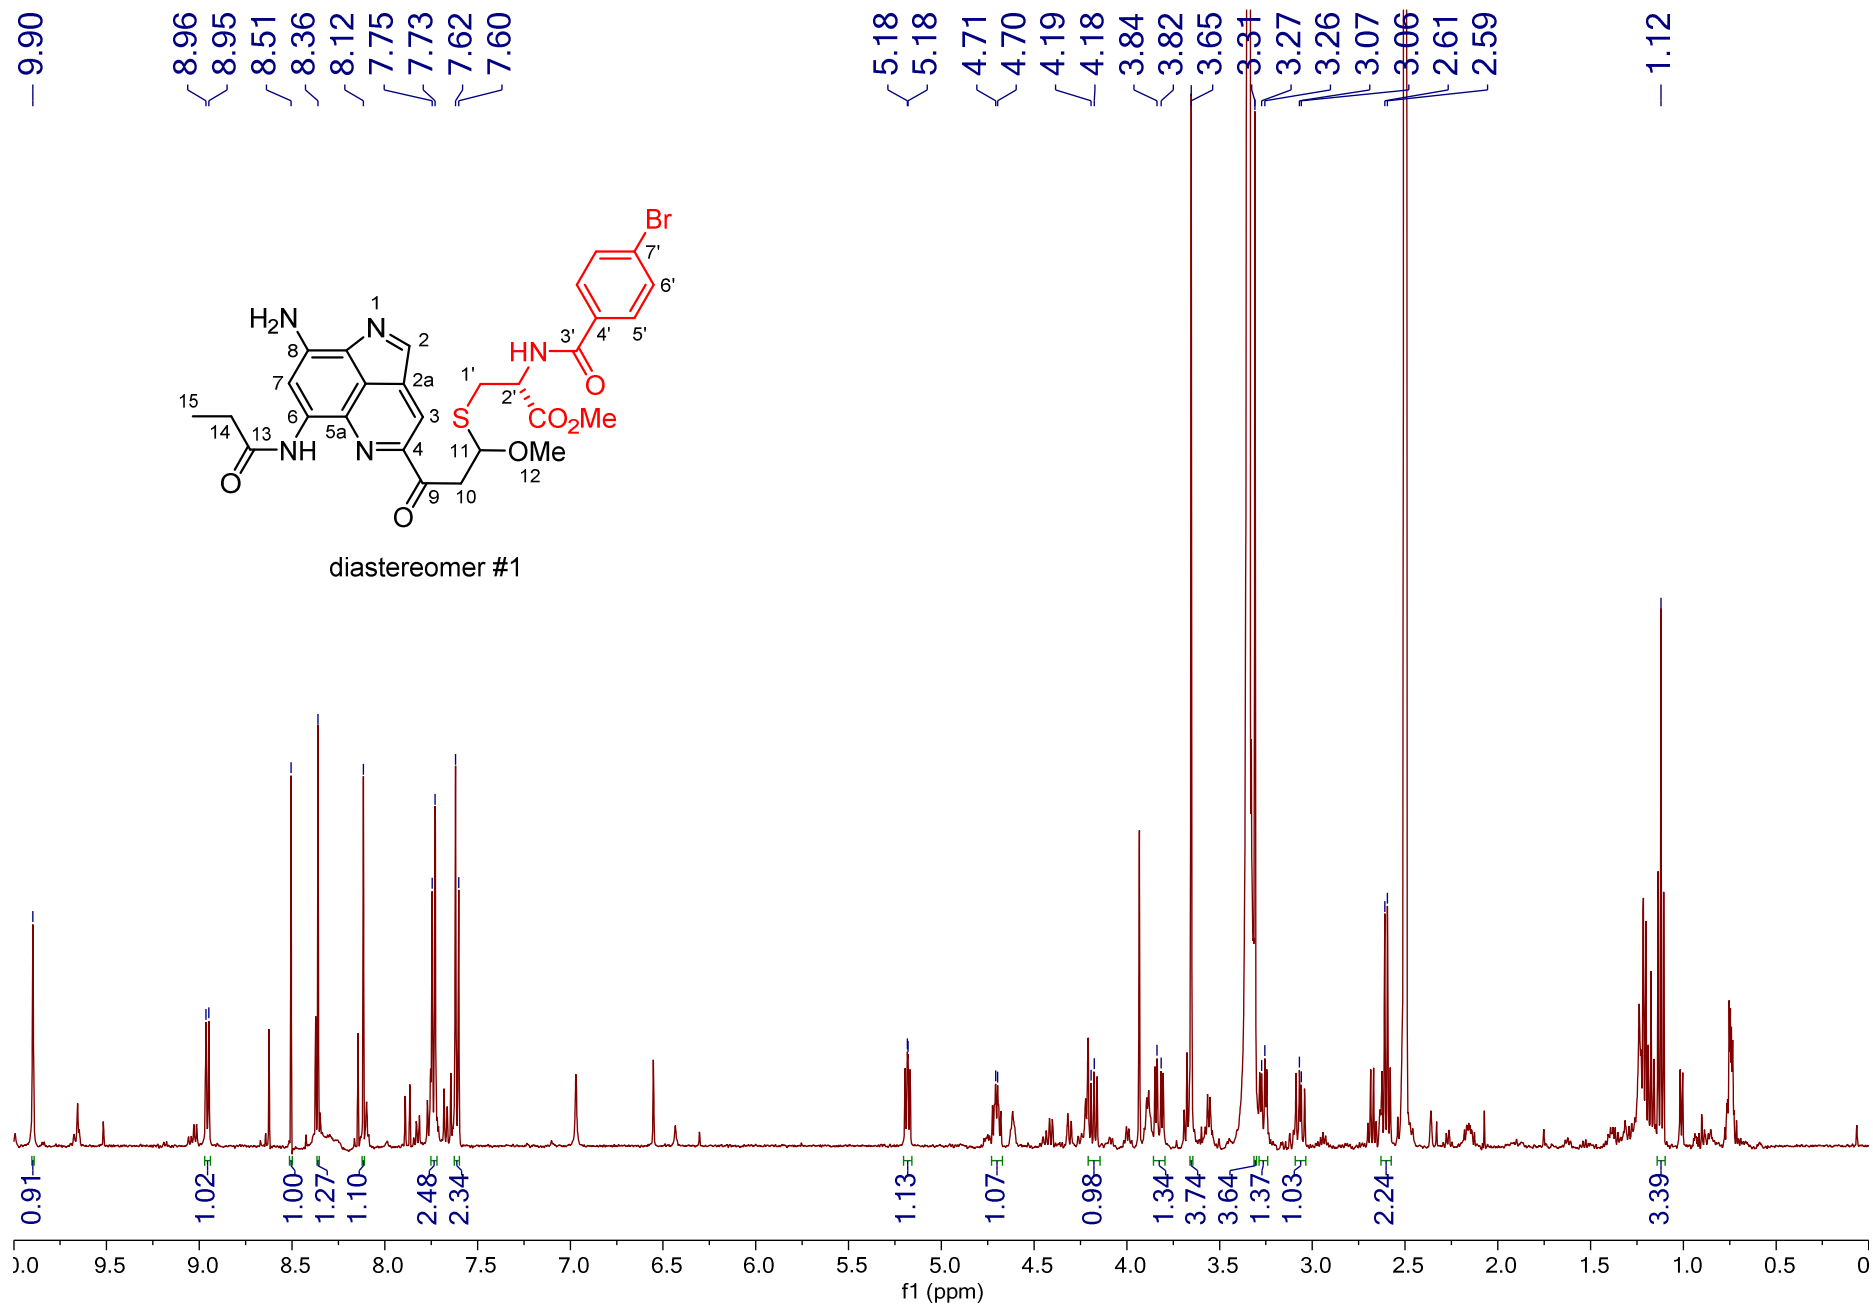

**Table S4.** NMR spectral data for neolymphostin B–cysteine thiol probe adduct (**3b**) in DMSO-*d*<sub>6</sub> at 500 MHz

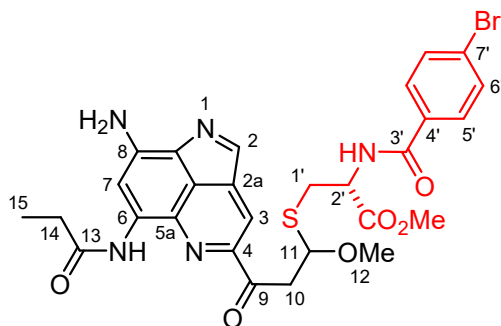

diastereomer #2

| Position # <sup>a</sup> | $\delta_{\text{H}}$ (mult., (J(Hz)))             | $\delta_{\text{C}}$ <sup>b</sup> | COSY               | HMBC           |
|-------------------------|--------------------------------------------------|----------------------------------|--------------------|----------------|
| 1                       | ----                                             | ----                             | ----               | ----           |
| 2                       | 8.37 (s)                                         | 145.5                            | ----               | 2a, 8b         |
| 2a                      | ----                                             | 136.3                            | ----               | ----           |
| 3                       | 8.50 (s)                                         | 117.4                            | ----               | 4, 8b          |
| 4                       | ----                                             | 145.4                            | ----               | ----           |
| 5a                      | ----                                             | 133.6                            | ----               | ----           |
| 6                       | ----                                             | 139.3                            | ----               | ----           |
| 6-NH                    | 9.91 (s)                                         | ----                             | ----               | 5a, 7, 13      |
| 7                       | 8.13 (s)                                         | 110.4                            | ----               | 5a, 6, 8a      |
| 8                       | ----                                             | n.d. <sup>c</sup>                | ----               | ----           |
| 8a                      | ----                                             | 124.8                            | ----               | ----           |
| 8b                      | ----                                             | 124.4                            | ----               | ----           |
| 9                       | ----                                             | 198.0                            | ----               | ----           |
| 10                      | a 3.82 (dd, 16.8, 5.1)<br>b 4.16 (dd, 16.8, 8.2) | 44.4                             | 10b, 11<br>10a, 11 | 9, 11<br>9, 11 |
| 11                      | 5.19 (dd, 8.0, 5.1)                              | 83.4                             | 10a, 10b           | 12, 1'         |
| 12                      | 3.32 (s)                                         | 54.6                             | ----               | 11             |
| 13                      | ----                                             | 173.2                            | ----               | ----           |
| 14                      | 2.60 (q, 7.5)                                    | 29.5                             | 15                 | 13, 15         |
| 15                      | 1.10 (t, 7.5)                                    | 9.0                              | 14                 | 13, 14         |
| 1'                      | a 3.08 (dd, 13.9, 9.5)<br>b 3.22 (dd, 13.9, 5.6) | 28.9                             | 1'b, 2'<br>1'a, 2' | 11, 2'<br>11   |
| 2'                      | 4.73 (m)                                         | 53.2                             | 1'a, 1'b, 2'-NH    | 8'             |
| 2'-NH                   | 9.02 (d, 7.8)                                    | ----                             | 2'                 | 3'             |
| 3'                      | ----                                             | 165.4                            | ----               | ----           |
| 4'                      | ----                                             | 132.6                            | ----               | ----           |
| 5'                      | 7.77 (d, 8.4)                                    | 129.2                            | 6'                 | 3', 7'         |
| 6'                      | 7.64 (d, 8.4)                                    | 131.1                            | 5'                 | 4', 7'         |
| 7'                      | ----                                             | 125.4                            | ----               | ----           |
| 8'                      | ----                                             | 171.0                            | ----               | ----           |
| 9'                      | 3.65 (s)                                         | 52.0                             | ----               | 8'             |

<sup>a</sup> Position numbering based on Aotani, et al. *J. Antibiot.* **1997**, *50*, 543–545.

<sup>b</sup> Carbon chemical shifts were based on HSQC and HMBC data

<sup>c</sup> n.d. = not determined

<sup>1</sup>H NMR (500 MHz, DMSO-*d*<sub>6</sub>) of neolymphostin B–cysteine thiol probe adduct (**3b**)

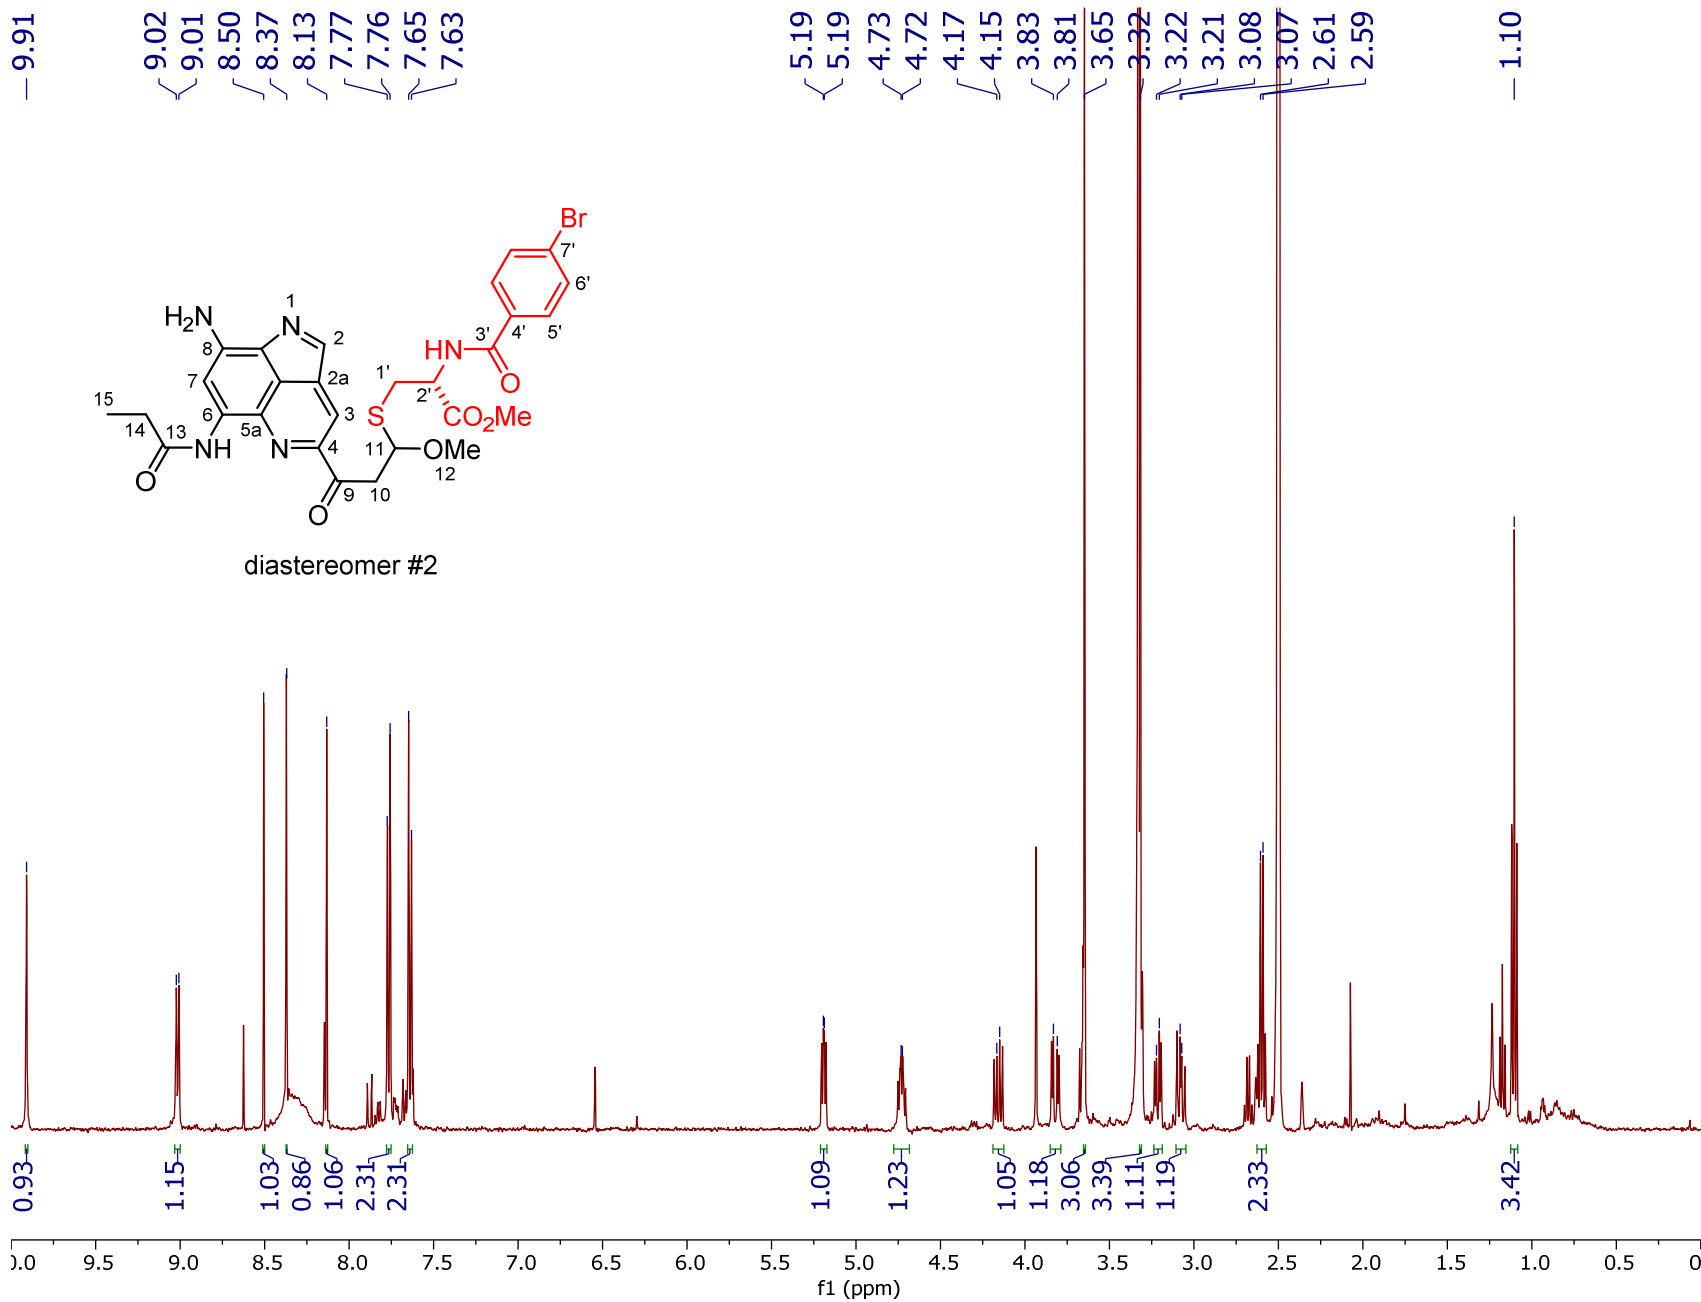



COSY (500 MHz, DMSO-*d*<sub>6</sub>) of neolymphostin B–cysteine thiol probe adduct (**3b**)

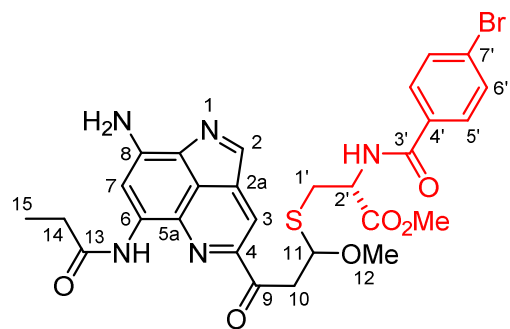

diastereomer #2

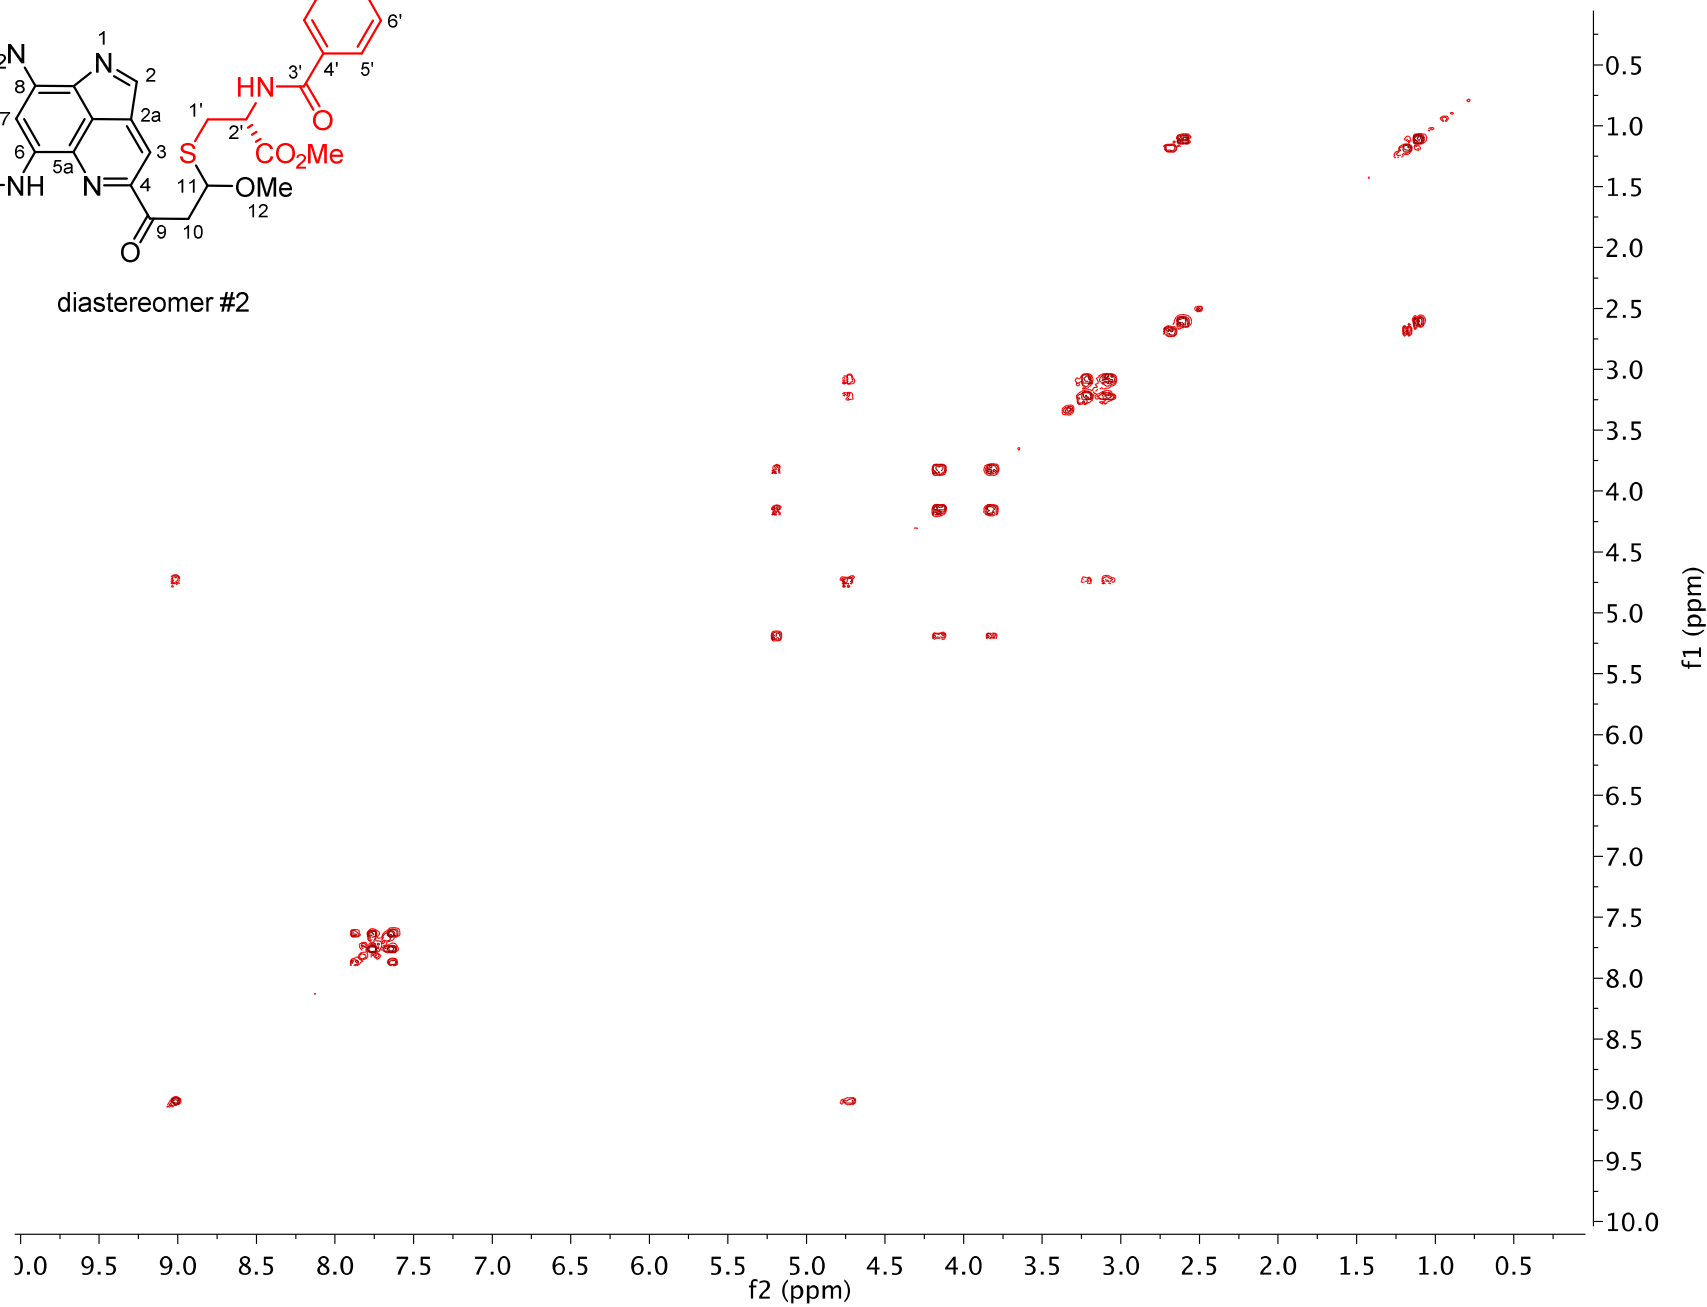

HSQC (500 MHz, DMSO-*d*<sub>6</sub>) of neolymphostin B–cysteine thiol probe adduct (**3b**)

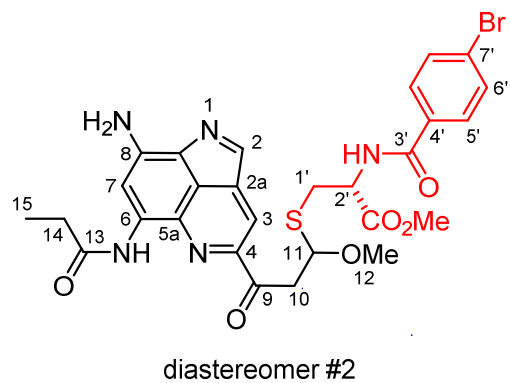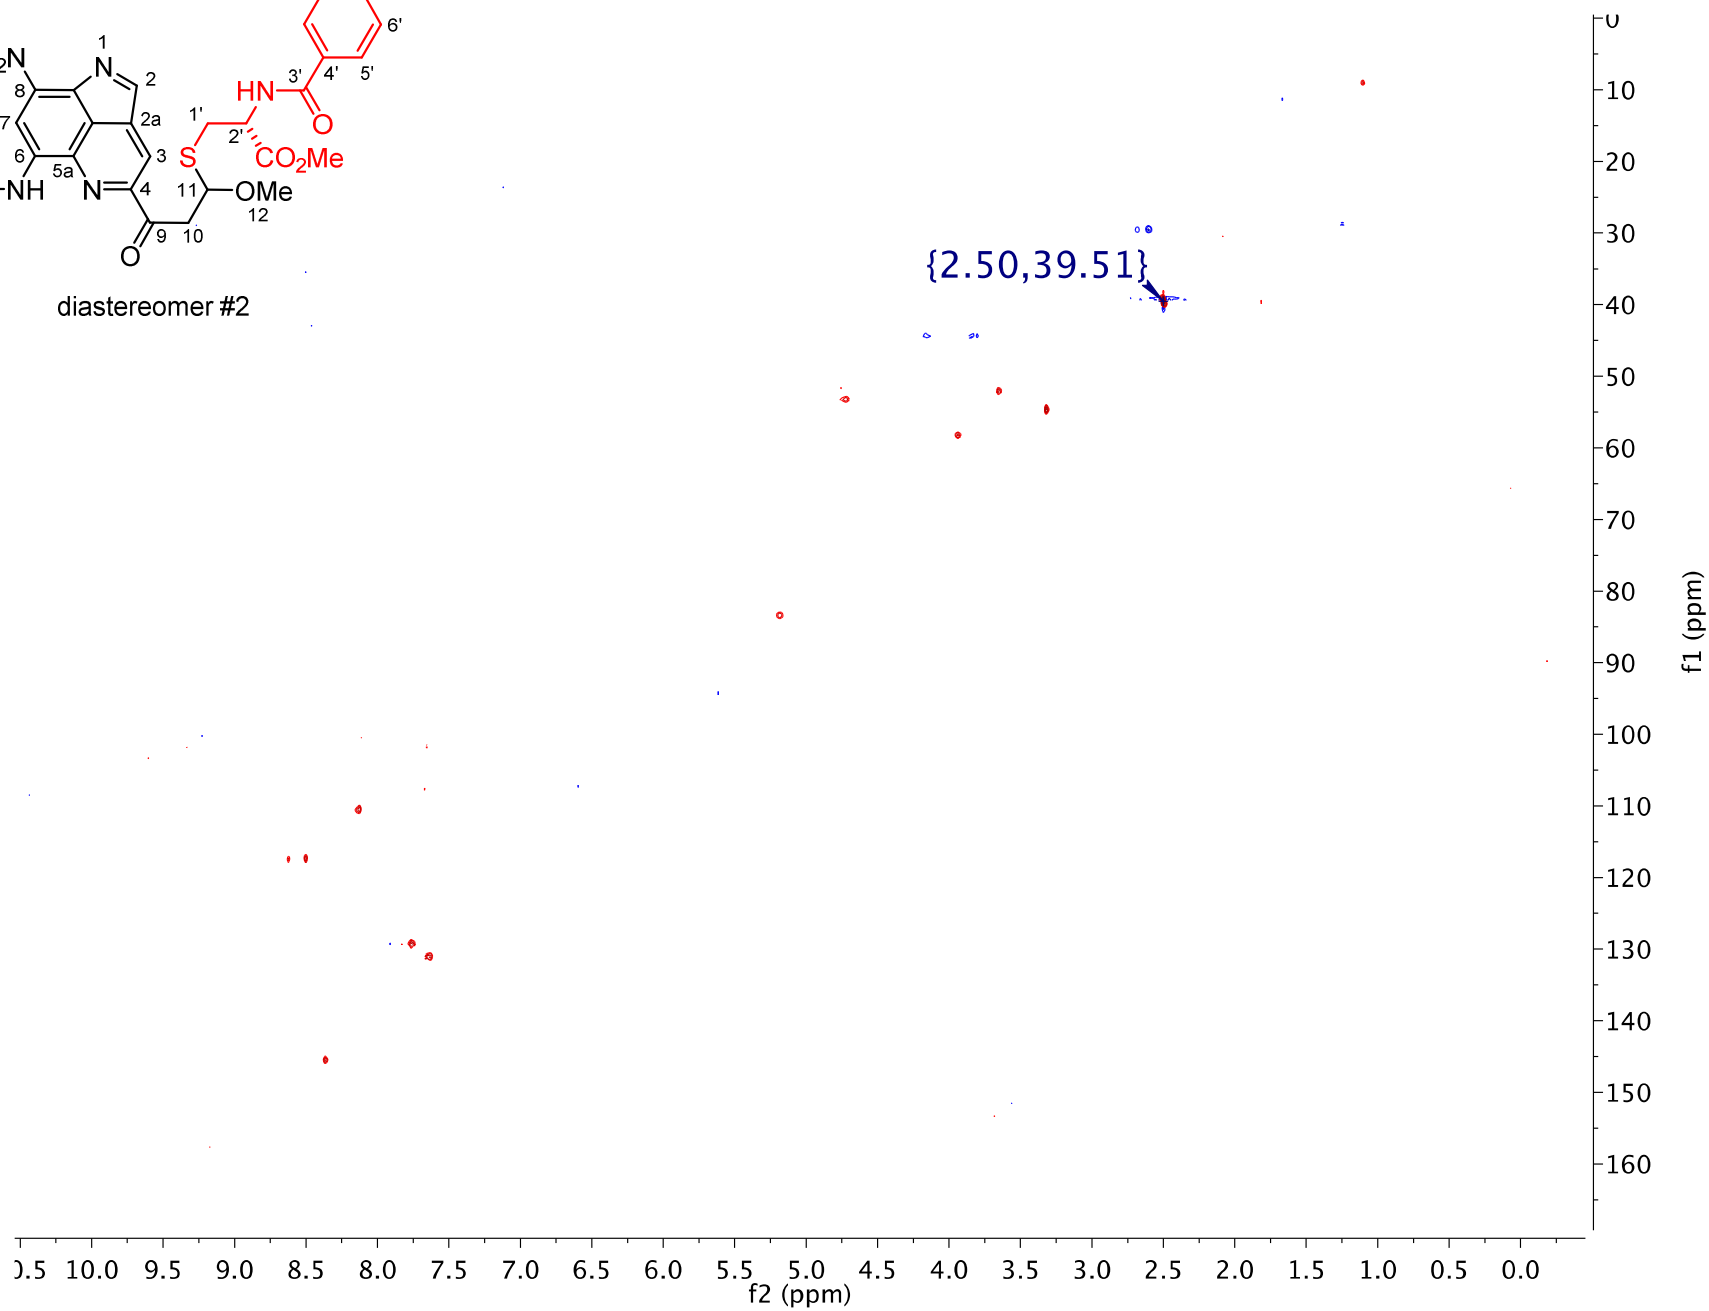

HMBC (500 MHz, DMSO-*d*<sub>6</sub>) of neolymphostin B–cysteine thiol probe adduct (**3b**)

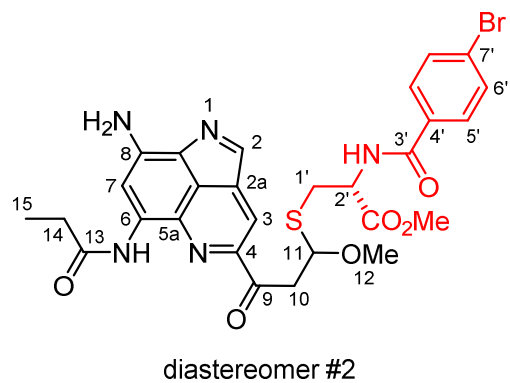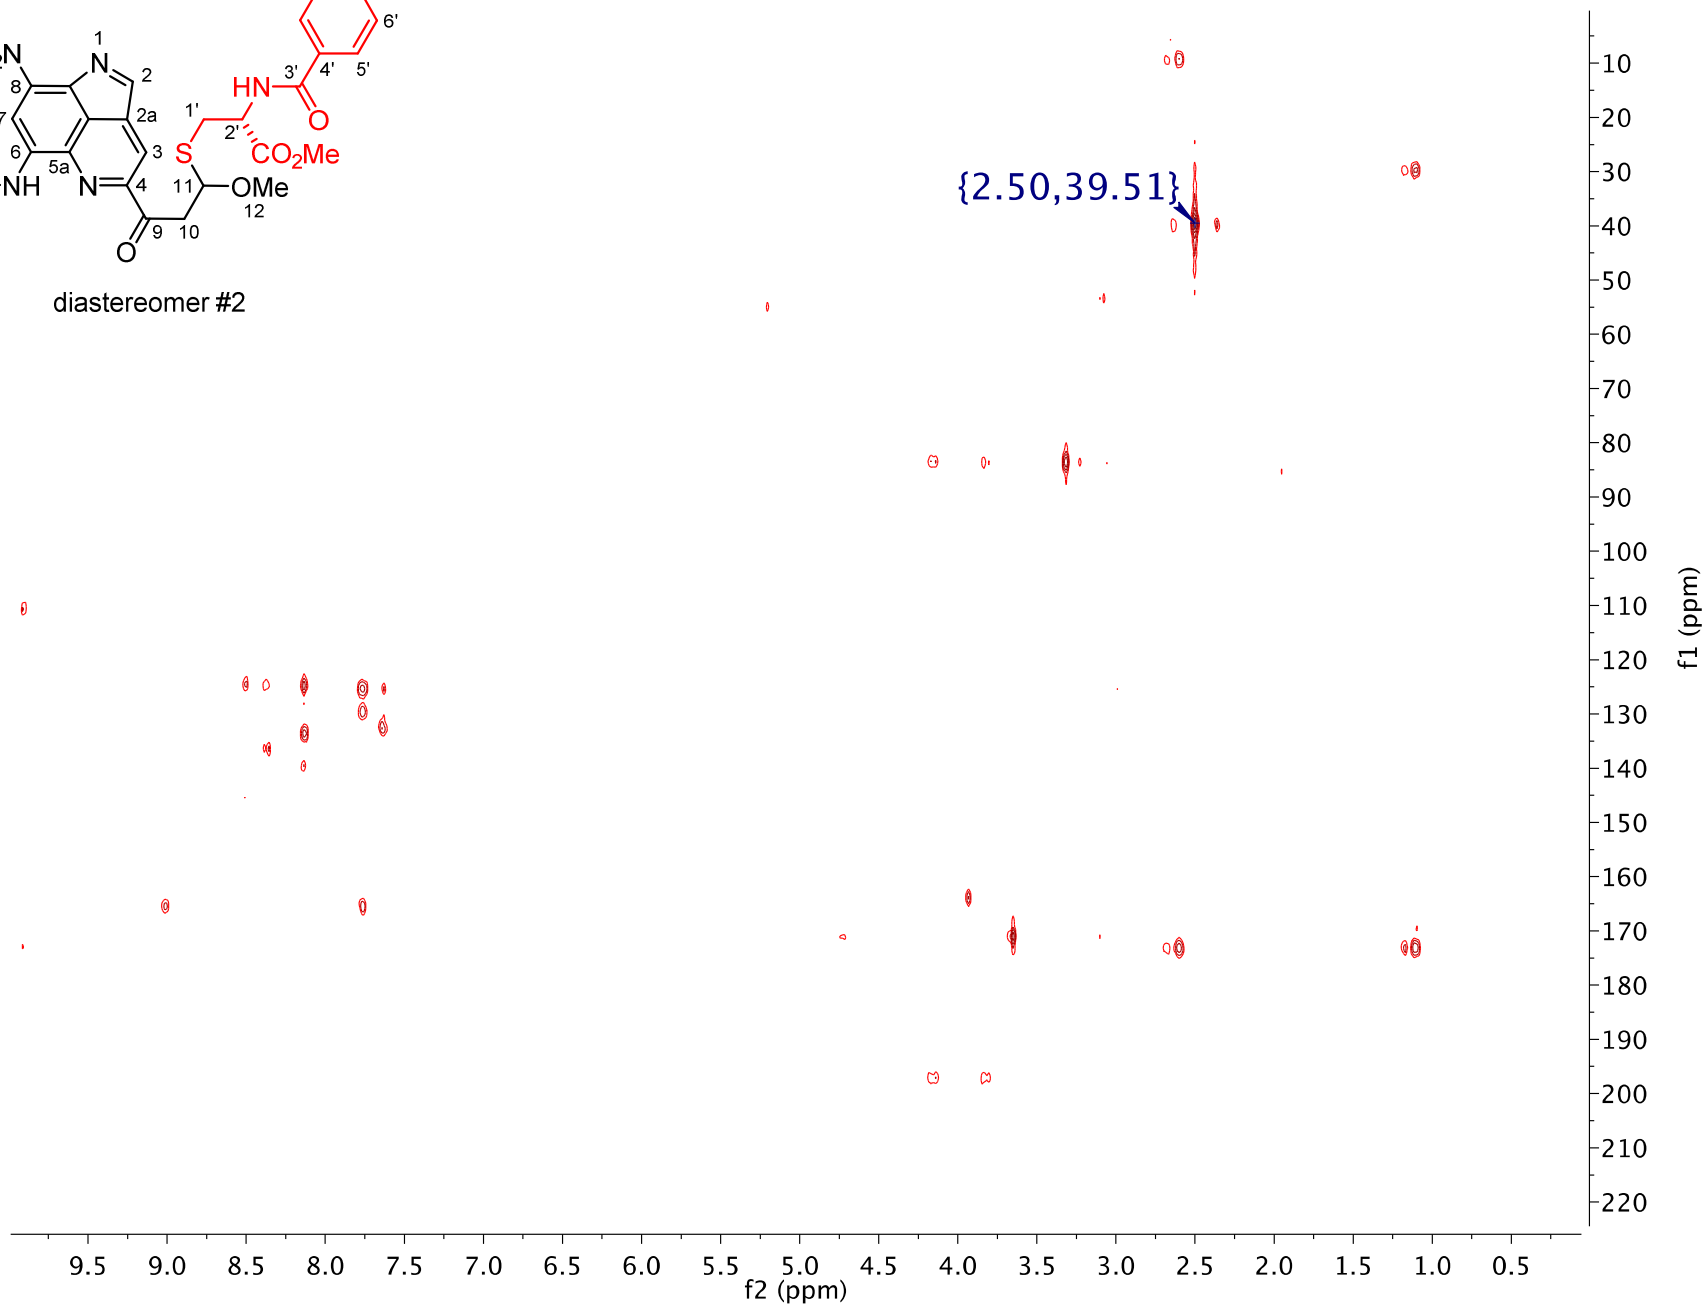

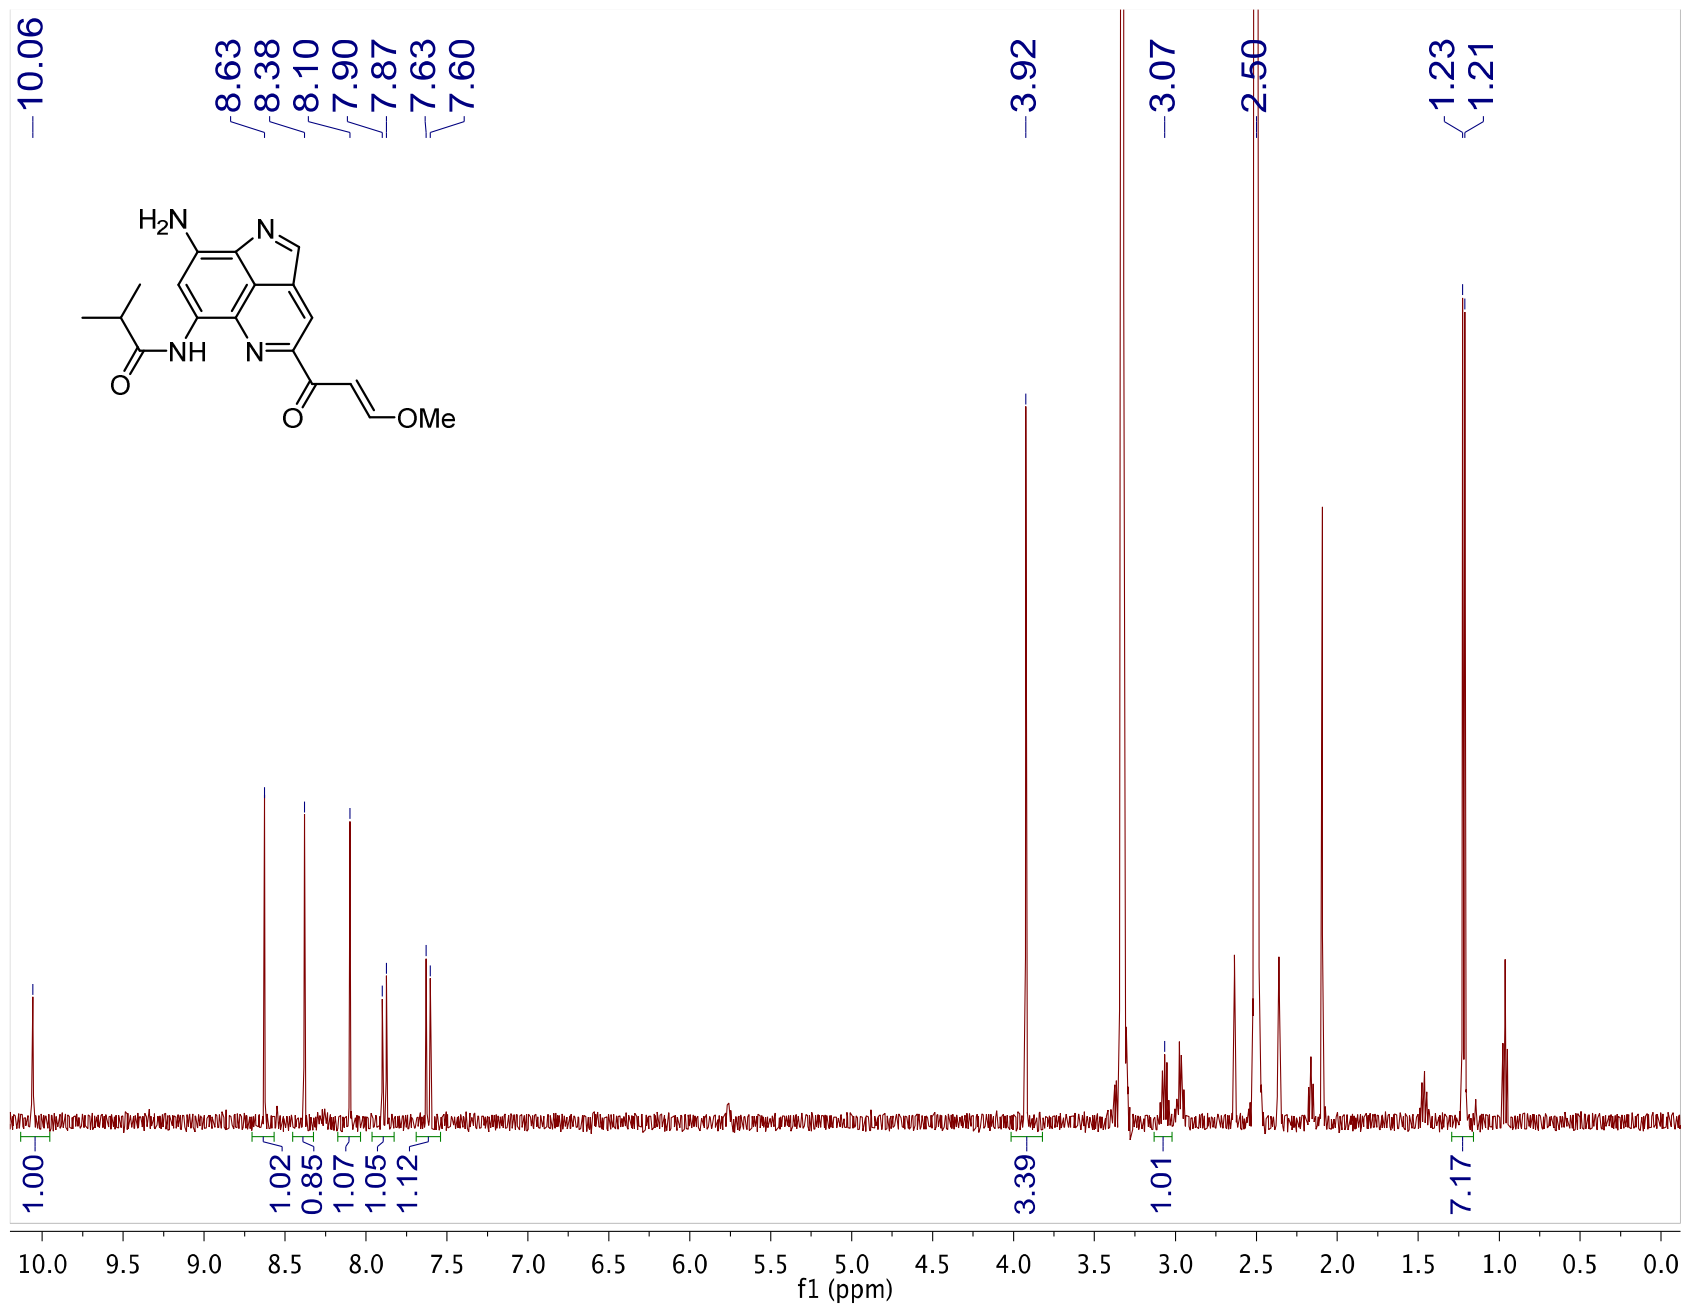

# HPLC chromatogram of neolymphostin A (4)

C18(2) Luna Phenomenex, 100 x 4.6 mm, 5  $\mu$ , 100  $\text{\AA}$   
 10-100% CH<sub>3</sub>CN in water (0.1% FA) over 10 min, 1.0 mL min<sup>-1</sup>  
 Top: ELSD; Bottom: 254 nm

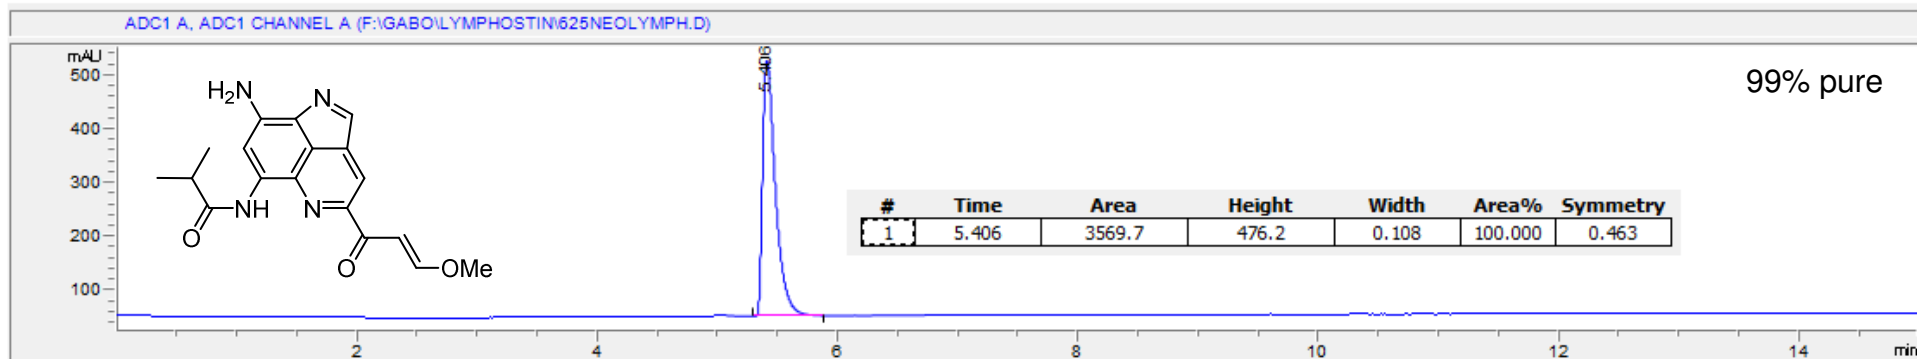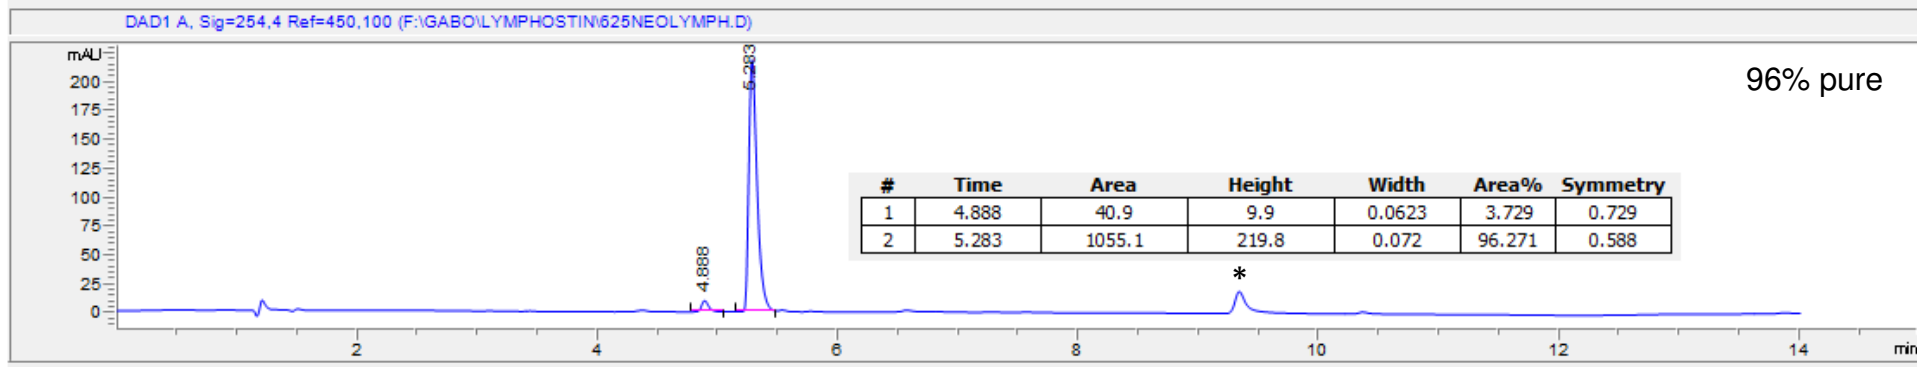

Blank run showing "ghost peak" at 9.3 min (254 nm)

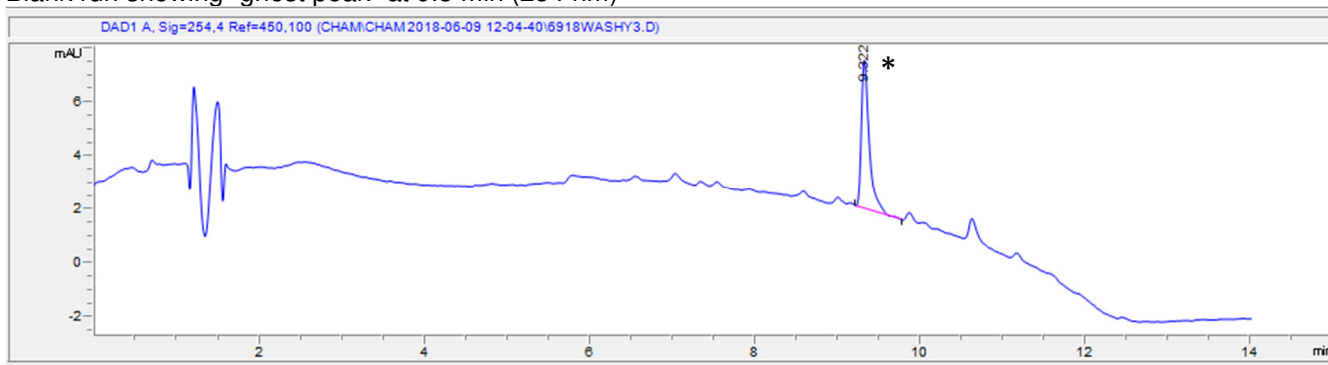

## Technology Overview

The KINOMEScan™ screening platform employs a novel and proprietary active site-directed competition binding assay to quantitatively measure interactions between test compounds and more than 450 human kinases and disease relevant mutant variants. This robust and reliable assay technology affords investigators the ability to extensively annotate compounds with accurate, precise and reproducible data. KINOMEScan™ assays do not require ATP and thereby report true thermodynamic interaction affinities, as opposed to IC<sub>50</sub> values, which can depend on the ATP concentration.

## How KINOMEScan™ Works

Compounds that bind the kinase active site and directly (sterically) or indirectly (allosterically) prevent kinase binding to the immobilized ligand, will reduce the amount of kinase captured on the solid support (A & B). Conversely, test molecules that do not bind the kinase have no effect on the amount of kinase captured on the solid support (C). Screening "hits" are identified by measuring the amount of kinase captured in test versus control samples by using a quantitative, precise and ultra-sensitive qPCR method that detects the associated DNA label (D). In a similar manner, dissociation constants (K<sub>d</sub>s) for test compound-kinase interactions are calculated by measuring the amount of kinase captured on the solid support as a function of the test compound concentration.

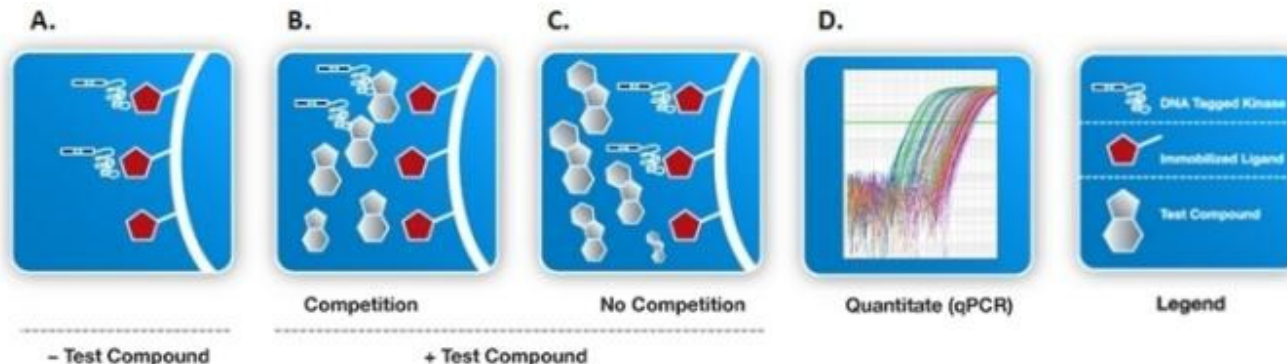

## Kinase assays

For most assays, kinase-tagged T7 phage strains were grown in parallel in 24-well blocks in an *E. coli* host derived from the BL21 strain. *E. coli* were grown to log-phase and infected with T7 phage from a frozen stock (multiplicity of infection = 0.4) and incubated with shaking at 32°C until lysis (90-150 minutes). The lysates were centrifuged (6,000 x g) and filtered (0.2µm) to remove cell debris. The remaining kinases were produced in HEK-293 cells and subsequently tagged with DNA for qPCR detection. Streptavidin-coated magnetic beads were treated with biotinylated small molecule ligands for 30 minutes at room temperature to generate affinity resins for kinase assays. The liganded beads were blocked with excess biotin and washed with blocking buffer (SeaBlock (Pierce), 1% BSA, 0.05 % Tween 20, 1 mM DTT) to remove unbound ligand and to reduce non-specific phage binding. Binding reactions were assembled by combining kinases, liganded affinity beads, and test compounds in 1x binding buffer (20 % SeaBlock, 0.17x PBS, 0.05 % Tween 20, 6 mM DTT). Test compounds were prepared as 40x stocks in 100% DMSO and directly diluted into the assay. All reactions were performed in polypropylene 384-well plates in a final volume of 0.02 ml. The assay plates were incubated at room temperature with shaking for 1 hour and the affinity beads were washed with wash buffer (1x PBS, 0.05 % Tween 20). The beads were then re-suspended in elution buffer (1x PBS, 0.05 % Tween 20, 0.5 µM non-biotinylated affinity ligand) and incubated at room temperature with shaking for 30 minutes. The kinase concentration in the eluates was measured by qPCR.

## Binding Constants (K<sub>d</sub>s)

Binding constants (K<sub>d</sub>s) were calculated with a standard dose-response curve using the Hill equation:

$$\text{Response} = \text{Background} + \frac{\text{Signal} - \text{Background}}{1 + \left( K_d^{\text{Hill Slope}} / \text{Dose}^{\text{Hill Slope}} \right)}$$

The Hill Slope was set to -1.

Curves were fitted using a non-linear least square fit with the Levenberg-Marquardt algorithm.

## Compound Handling

An 11-point 3-fold serial dilution of each test compound was prepared in 100% DMSO at 100x final test concentration and subsequently diluted to 1x in the assay (final DMSO concentration = 1%). Most K<sub>d</sub>s were determined using a compound top concentration = 30,000 nM. If the initial K<sub>d</sub> determined was < 0.5 nM (the lowest concentration tested), the measurement was repeated with a serial dilution starting at a lower top concentration. A K<sub>d</sub> value reported as 40,000 nM indicates that the K<sub>d</sub> was determined to be >30,000 nM.

## scanKINETIC platform

This protocol offers dissociation kinetics to classify inhibitors as irreversible, reversible-slow dissociation, or reversible-rapid dissociation. Kinetic dissociation constants were measured like described above but equilibration time and dilutions were varied in a set of four different experiments, study arms A-D. In study arm A and C, the compound and kinase were combined and equilibrated for 6 h and 1 h, respectively, before measuring the K<sub>d</sub>. In study arm B the compound and kinase were combined and equilibrated for 1 h, diluted 30-fold, and re-equilibrated for 5 h. In study arm D the compound and kinase were pre-diluted, combined, and equilibrated for 5 h.

## Percent Control (%Ctrl)

Neolymphostin A was screened at 1000nm against a panel of kinases and results for primary screen binding interactions are reported as '% Ctrl', where lower numbers indicate stronger hits.

$$\% \text{Ctrl} = \left( \frac{\text{test compound signal} - \text{positive control signal}}{\text{negative control signal} - \text{positive control signal}} \right) \times 100$$

test compound = neolymphostin A, negative control = DMSO (100%Ctrl), positive control = control compound (0%Ctrl)

## Selectivity Score (S-scores)

Selectivity Score or S-score is a quantitative measure of compound selectivity. It is calculated by dividing the number of kinases that compounds bind to by the total number of distinct kinases tested, excluding mutant variants. This value can be calculated using %Ctrl as a potency threshold (below) and provides a quantitative method of describing compound selectivity to facilitate comparison of different compounds.

$$S(35) = (\text{number of non-mutant kinases with } \% \text{Ctrl} < 35) / (\text{number of non-mutant kinases tested})$$

$$S(10) = (\text{number of non-mutant kinases with } \% \text{Ctrl} < 10) / (\text{number of non-mutant kinases tested})$$

$$S(1) = (\text{number of non-mutant kinases with } \% \text{Ctrl} < 1) / (\text{number of non-mutant kinases tested})$$

**Table S5.** Dissociation constants ( $K_d$ ) for neolymphostin A and selected kinases

| Target      | neolymphostin A |
|-------------|-----------------|
| Gene Symbol | $K_d$ (nM)      |
| BTK         | 3370            |
| LCK         | 4600            |
| MTOR        | 10              |
| PIK3CA      | 0.88            |
| PIK3CB      | 5.7             |
| PIK3CD      | 3.5             |
| PIK3CG      | 4.9             |



## Curve images for dissociation constants ( $K_d$ ) for neolymphostin A and selected kinases

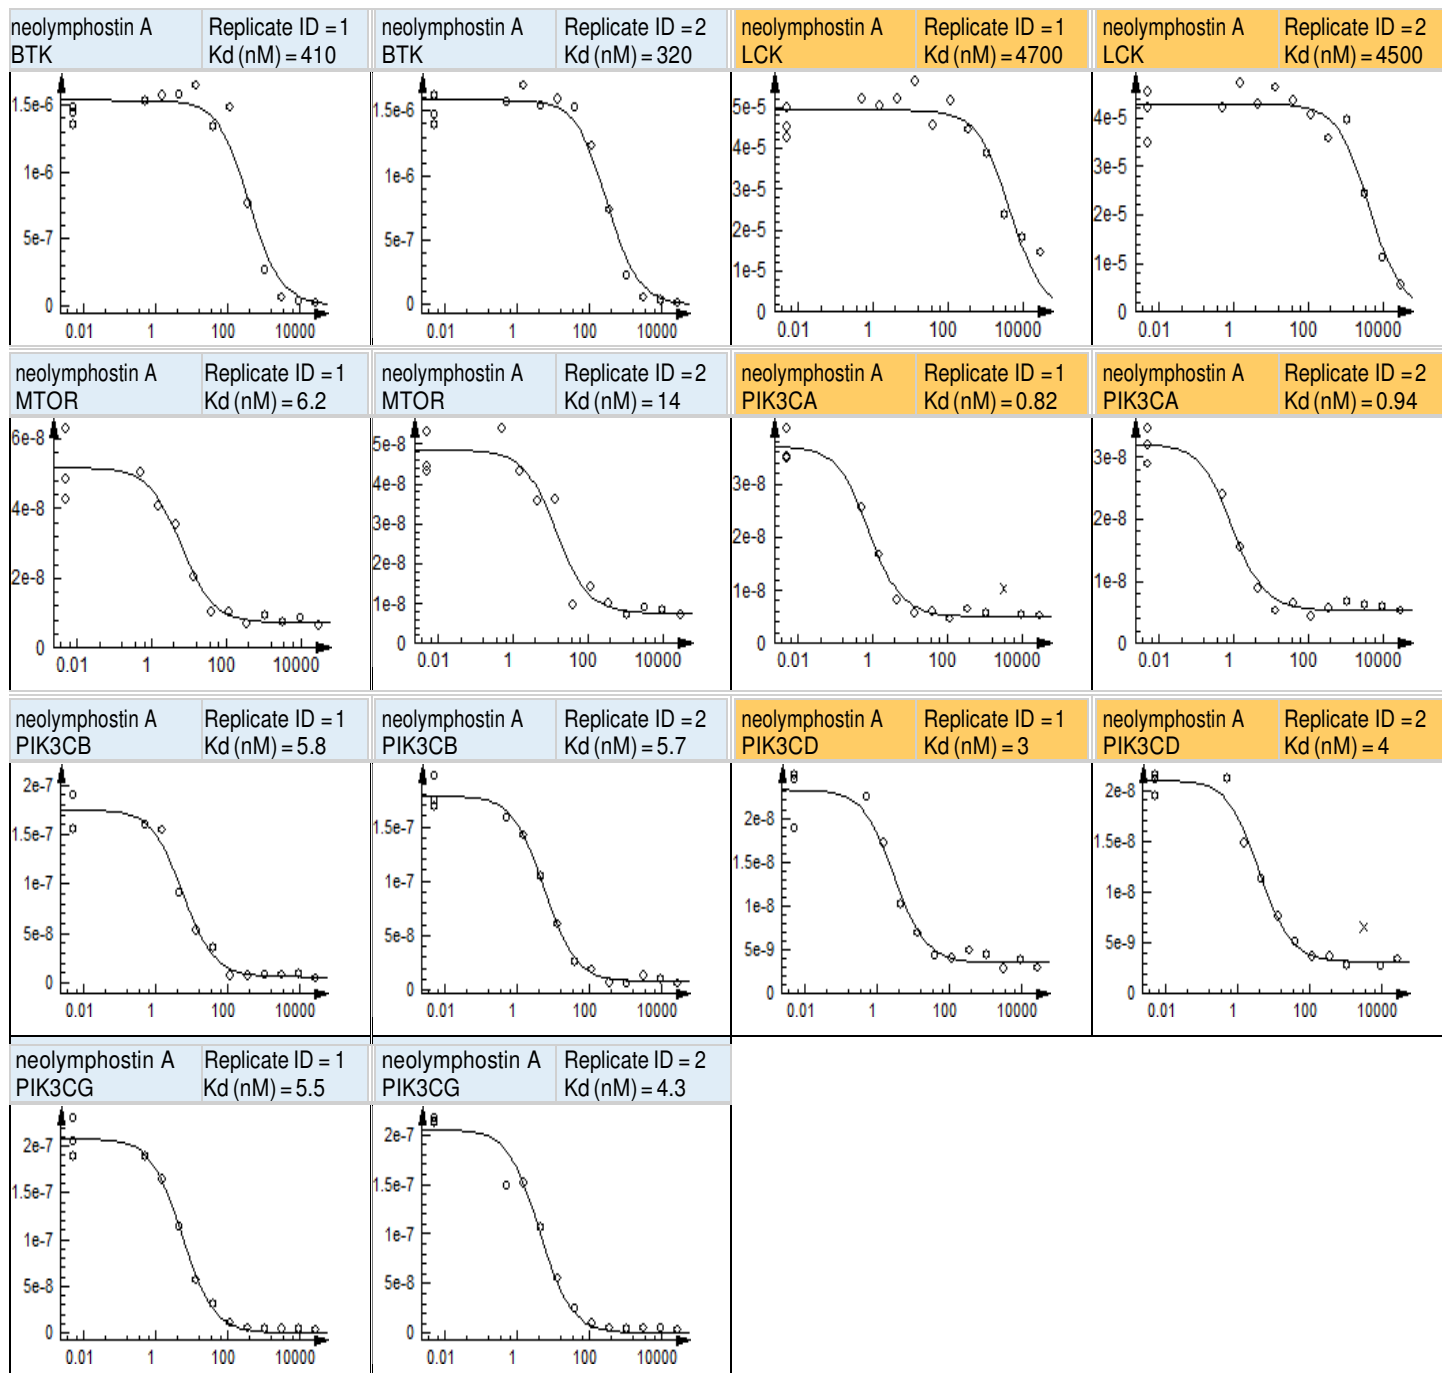

The amount of kinase measured by qPCR (Signal; y-axis) is plotted against the corresponding compound concentration in nM in log<sub>10</sub> scale (x-axis). Data points marked with an "x" were not used for  $K_d$  determination.

**Table S6.** Dissociation constants ( $K_d$ ) for wortmannin and selected kinases

| Target      | neolymphostin A |
|-------------|-----------------|
| Gene Symbol | $K_d$ (nM)      |
| MTOR        | 9200            |
| PIK3CA      | 5.4             |
| PIK3CB      | 7.6             |
| PIK3CD      | 15              |
| PIK3CG      | 5.5             |

H NMR (500 MHz, phosphate-buffered D<sub>2</sub>O) of 6

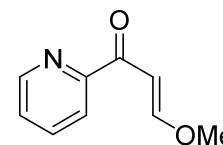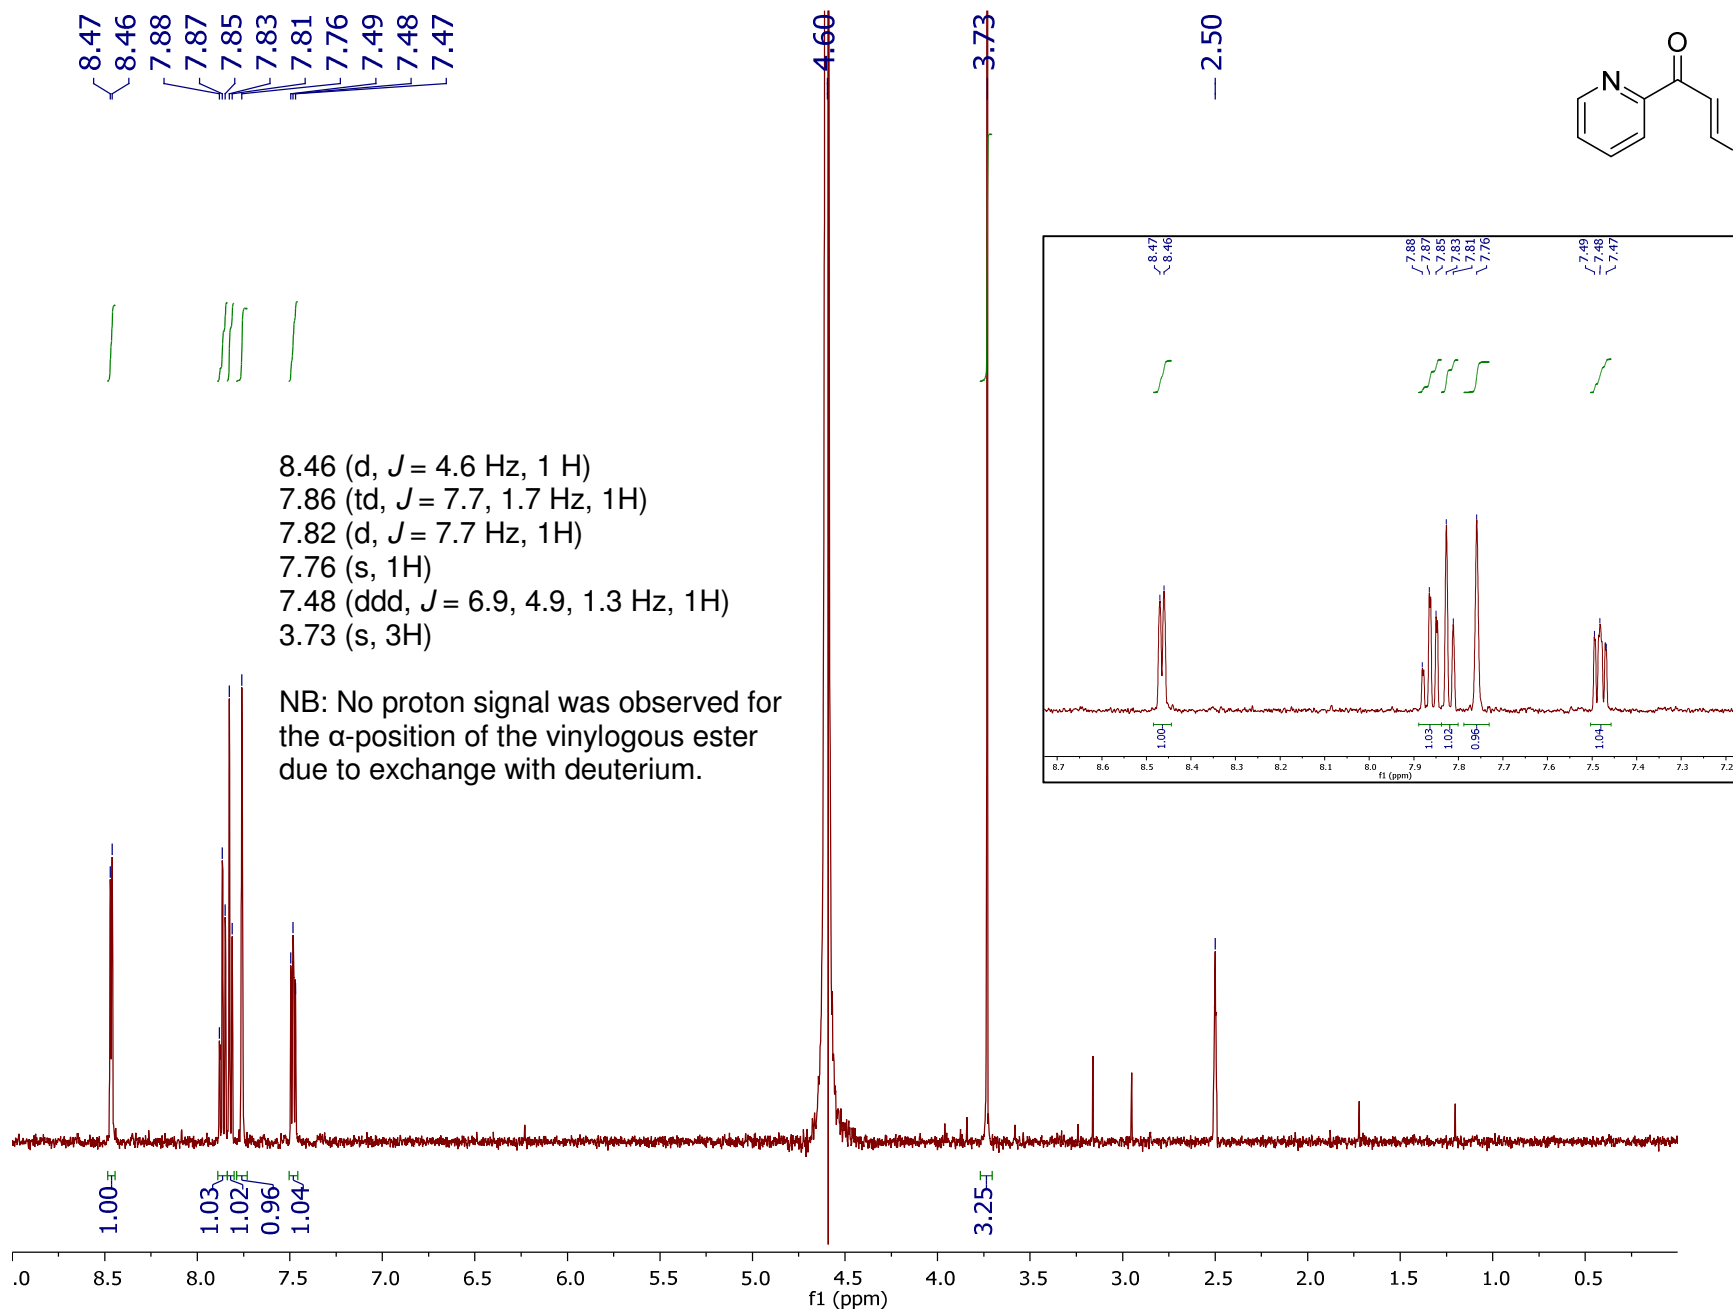

**Figure S4a.**  $^1\text{H}$  NMR kinetics data for **6** reacting with GSH in phosphate-buffered  $\text{D}_2\text{O}$ , pH 7.4,  $25^\circ\text{C}$

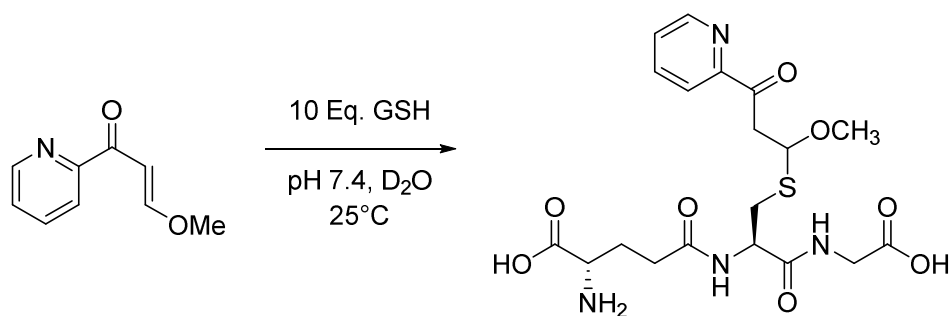

| time, min. | $\ln([\mathbf{6}])$ , 8.46 ppm | $\ln([\mathbf{6}])$ , 7.48 ppm |
|------------|--------------------------------|--------------------------------|
| 5          | -7.253256922                   | -7.331238893                   |
| 10         | -7.56062856                    | -7.785473736                   |
| 15         | -7.901007052                   | -7.898153983                   |
| 20         | -8.08047554                    | -8.259364082                   |
| 25         | -8.218337818                   | -8.496990484                   |
| 30         | -8.485104877                   | -8.822574841                   |

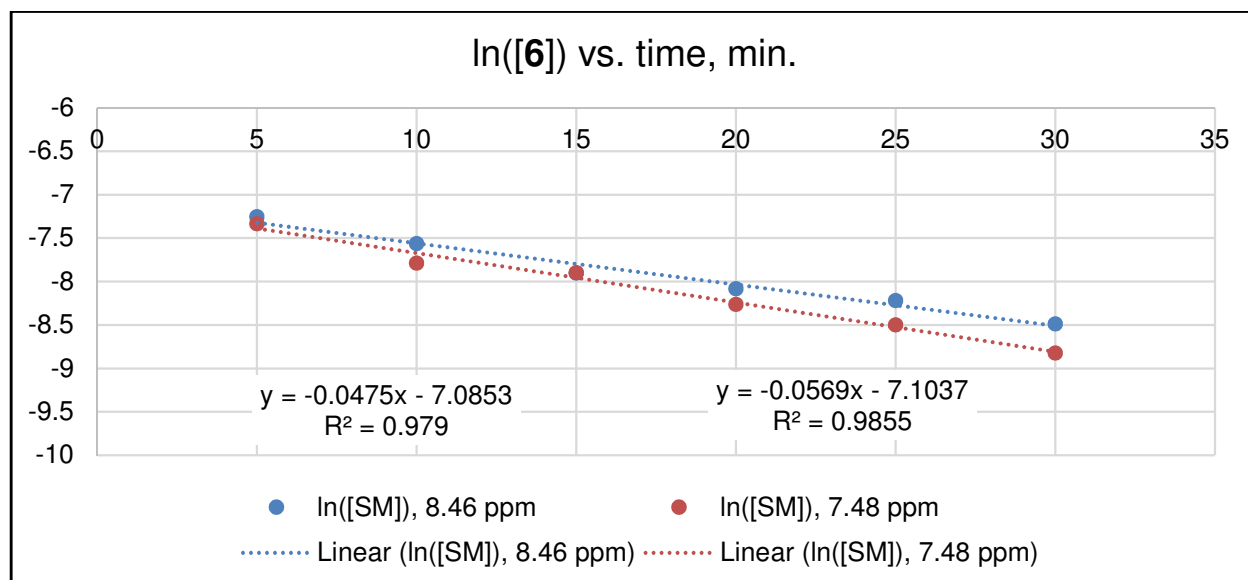

|                                       | signal at 8.46 ppm | signal at 7.48 ppm | average              |
|---------------------------------------|--------------------|--------------------|----------------------|
| slope of $\ln([\mathbf{6}])$ vs. time | -0.0475            | -0.0569            | -0.0522 <sup>a</sup> |
| calculated half-life, min.            | 14.6               | 12.2               | 13.3 <sup>b</sup>    |

<sup>a</sup>Average of slopes of each linear regression line

<sup>b</sup>Calculated by  $t_{1/2} = \ln(2)/(-1 \cdot \text{average slope})$

Stacked  $^1\text{H}$  NMR spectra of **6** reacting with GSH in phosphate-buffered  $\text{D}_2\text{O}$ , pH 7.4,  $25^\circ\text{C}$

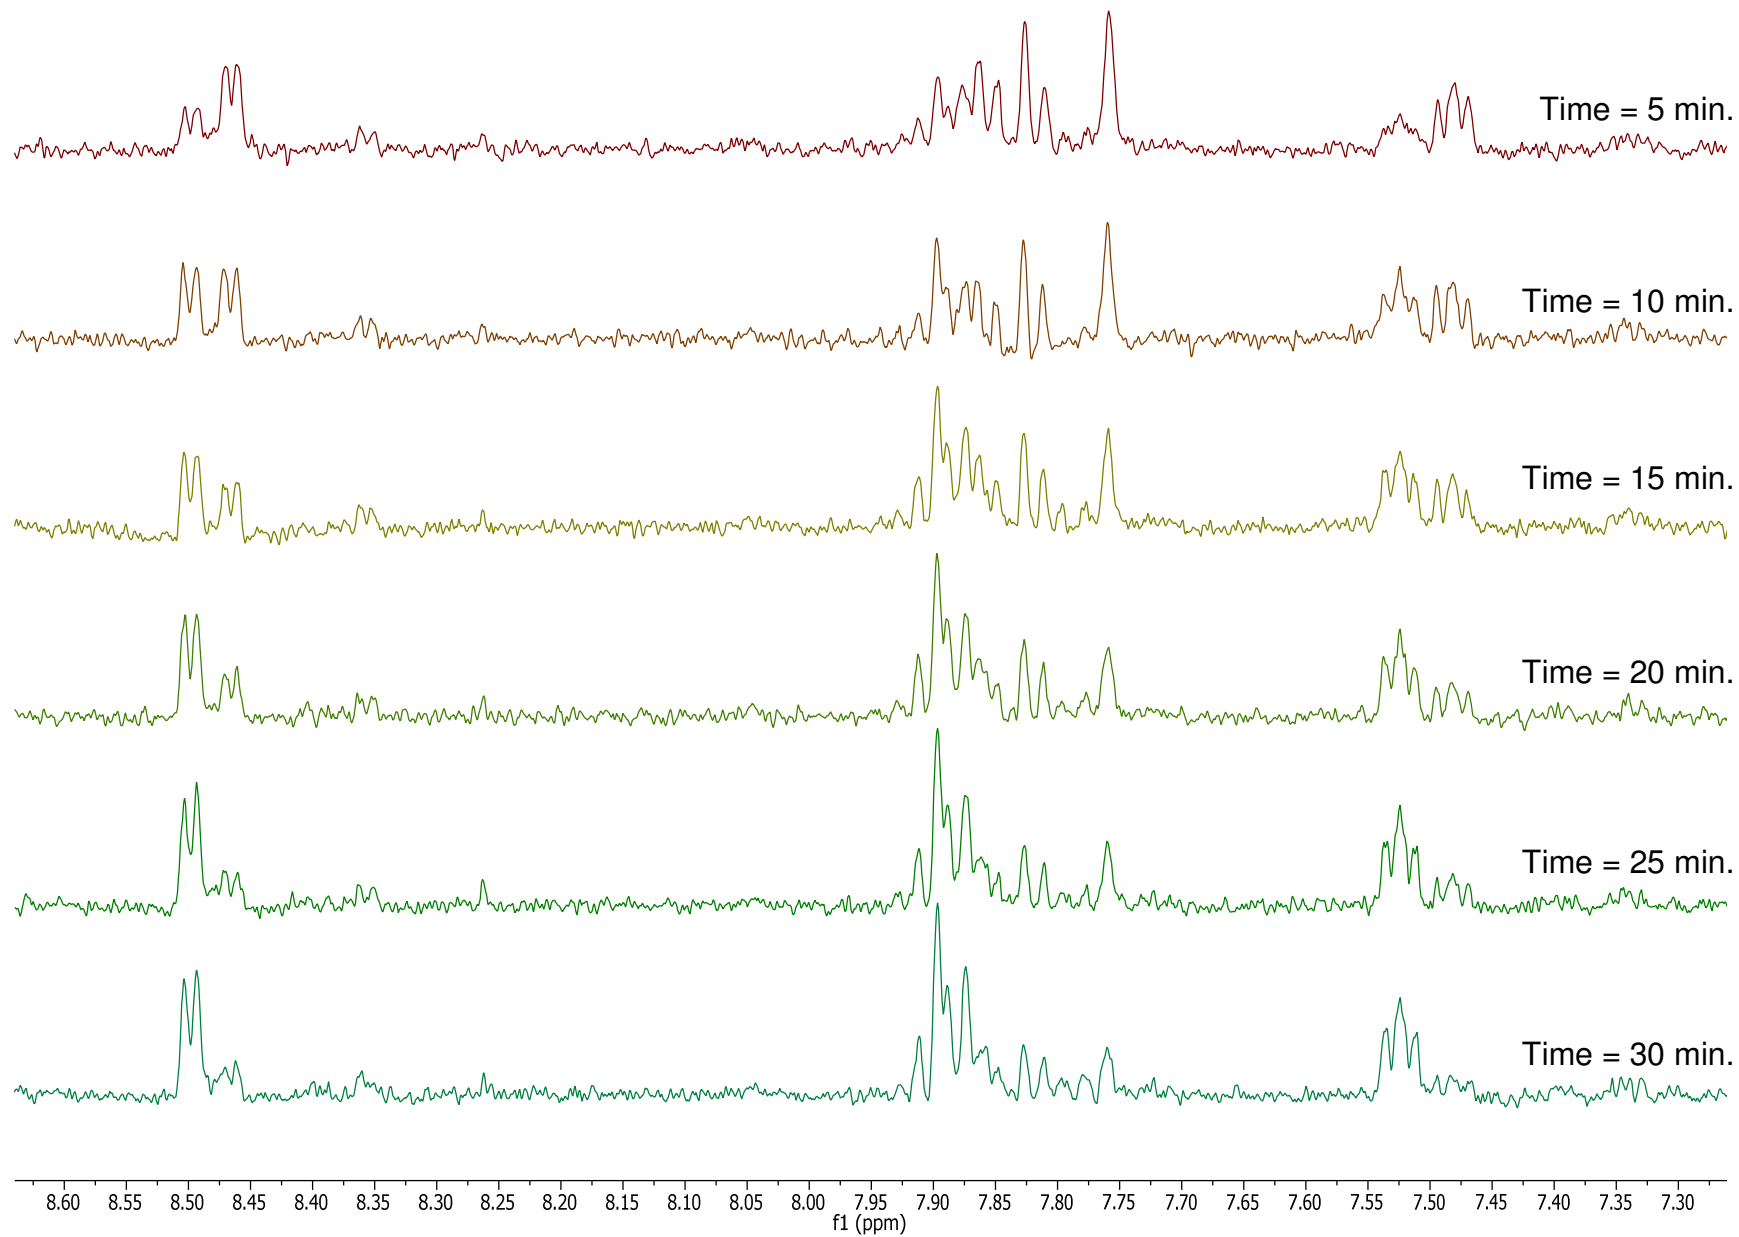

**Figure S4b.** <sup>1</sup>H NMR kinetics data for **6** reacting with GSH in phosphate-buffered D<sub>2</sub>O, pH 7.4, 37°C

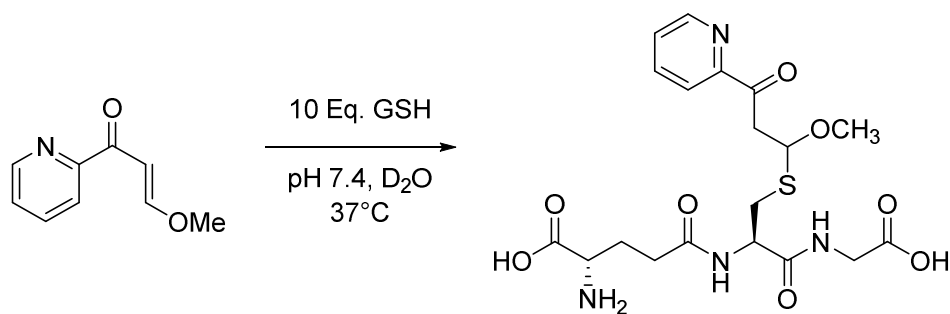

| time, min. | ln([ <b>6</b> ]), 8.46 ppm | ln([ <b>6</b> ]), 7.48 ppm |
|------------|----------------------------|----------------------------|
| 5          | -7.385382833               | -7.407998793               |
| 10         | -7.830088325               | -7.919356191               |
| 15         | -8.317580138               | -8.303619091               |
| 20         | -8.853665428               | -9.104979856               |

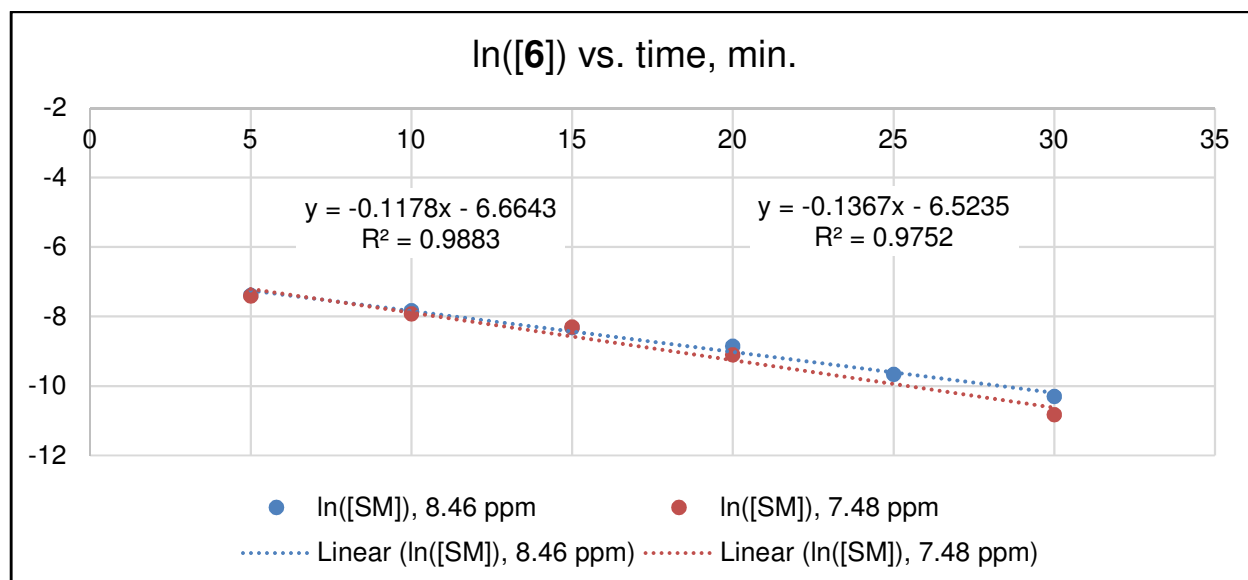

|                                    | signal at 8.46 ppm | signal at 7.48 ppm | average               |
|------------------------------------|--------------------|--------------------|-----------------------|
| slope of ln([ <b>6</b> ]) vs. time | -0.1178            | -0.1367            | -0.12725 <sup>a</sup> |
| calculated half-life, min.         | 5.9                | 5.1                | 5.4 <sup>b</sup>      |

<sup>a</sup>Average of slopes of each linear regression line

<sup>b</sup>Calculated by  $t_{1/2} = \ln(2)/(-1 \cdot \text{average slope})$

Stacked  $^1\text{H}$  NMR spectra of **6** reacting with GSH in phosphate-buffered  $\text{D}_2\text{O}$ , pH 7.4,  $37^\circ\text{C}$

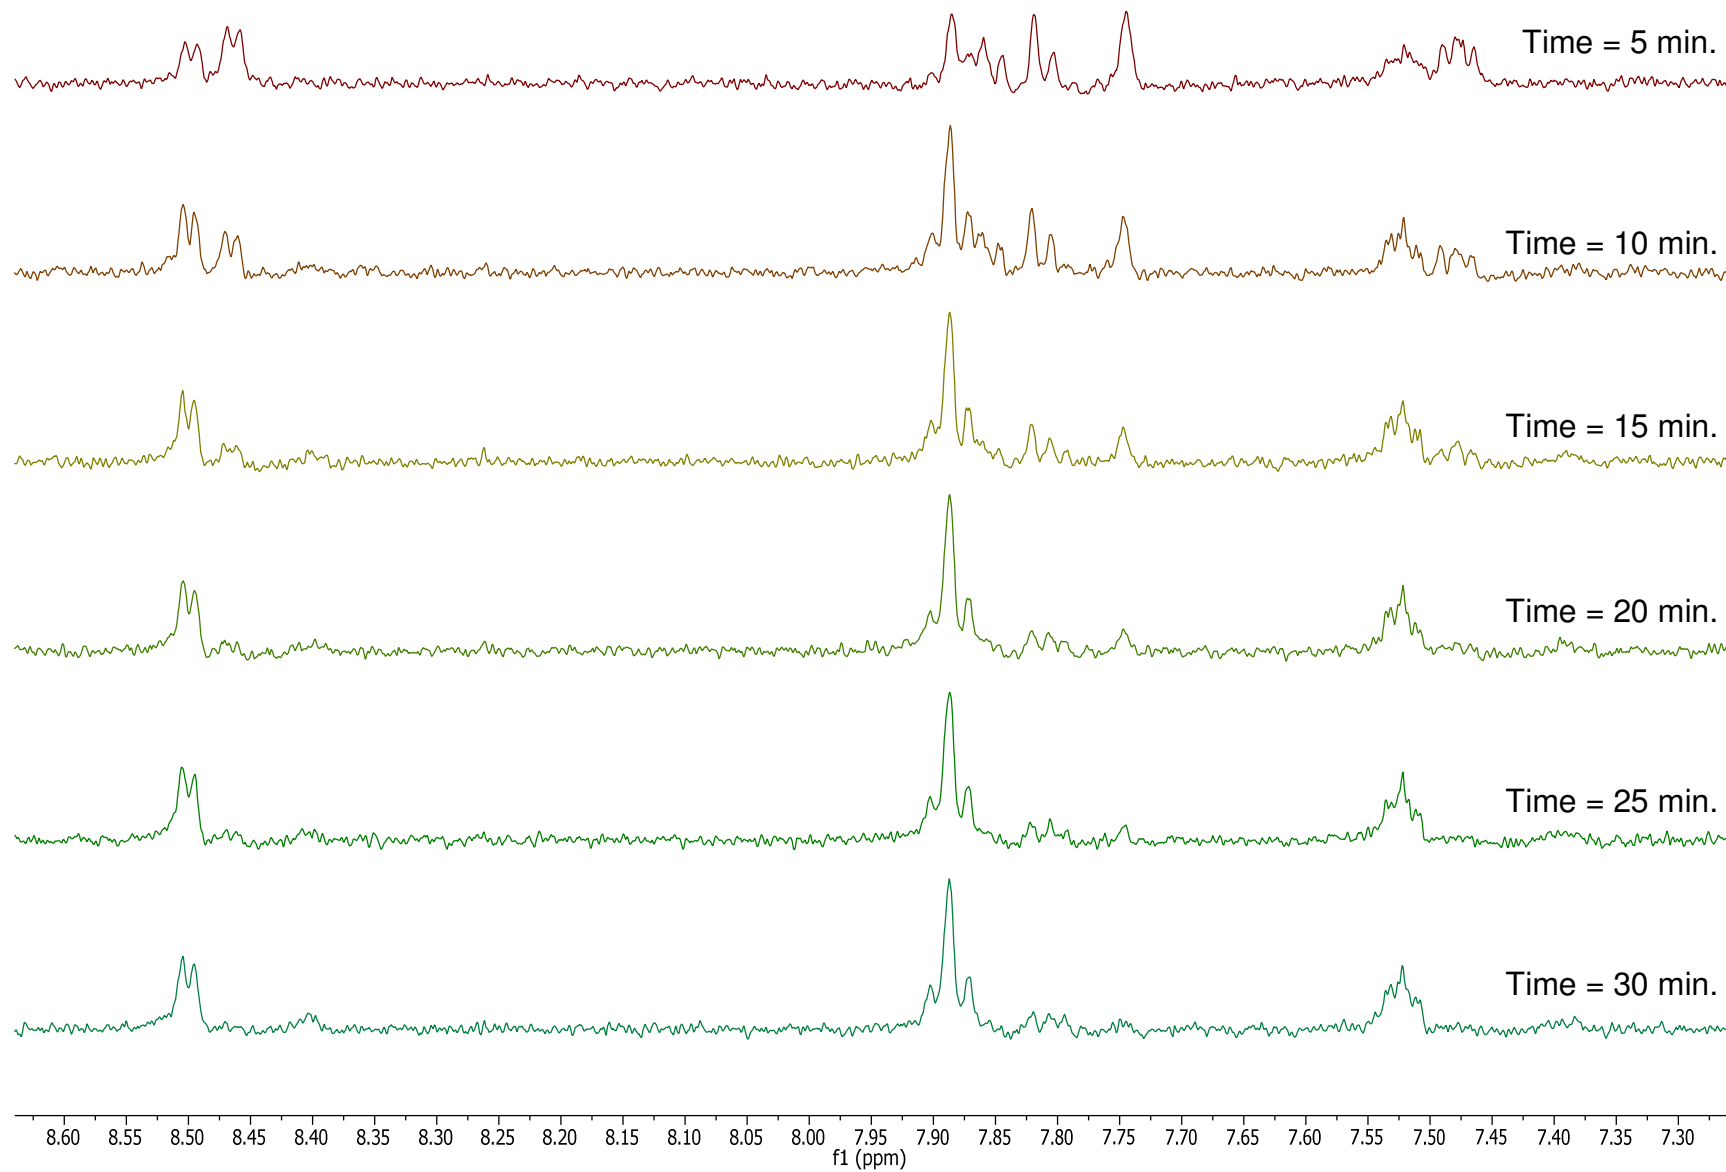

**Table S7.** Dissociation constants ( $K_d$ ) for neolymphostin A and selected kinases under four conditioning experiments (Arms A–D)

| Compound                     | BTK        | CDK4-CYCLIND3 | PIK3CA     | PIK3CG     |
|------------------------------|------------|---------------|------------|------------|
| Compound name (conditioning) | $K_d$ (nm) | $K_d$ (nm)    | $K_d$ (nm) | $K_d$ (nm) |
| Neolymphostin A (Arm A)      | 260        | 9300          | 0.44       | 2          |
| Neolymphostin A (Arm B)      | 320        | 21000         | 0.64       | 5.9        |
| Neolymphostin A (Arm C)      | 110        | 17000         | 0.67       | 2.7        |
| Neolymphostin A (Arm D)      | 7900       | >30000        | 19         | 92         |

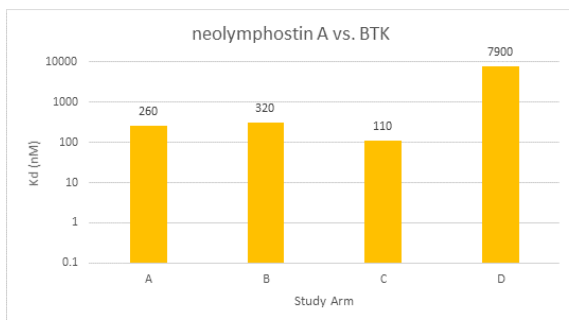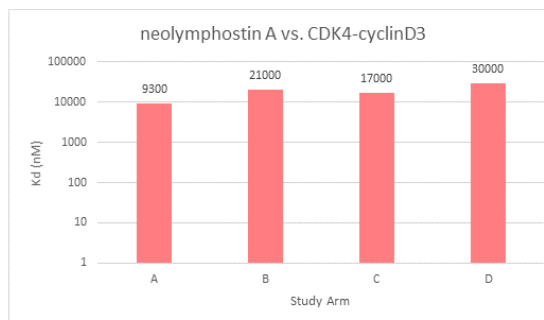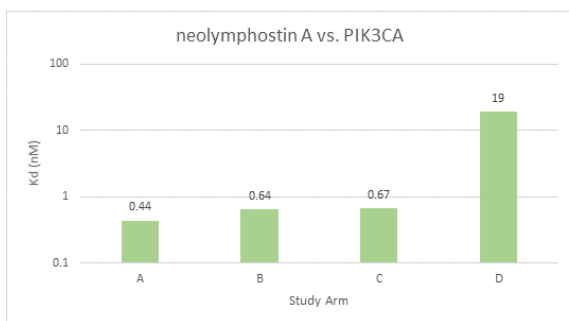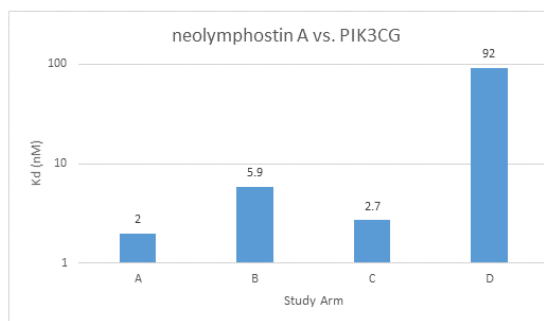



Curve images for dissociation constants ( $K_d$ ) for neolymphostin A and selected kinases under four conditioning experiments (Arms A–D)

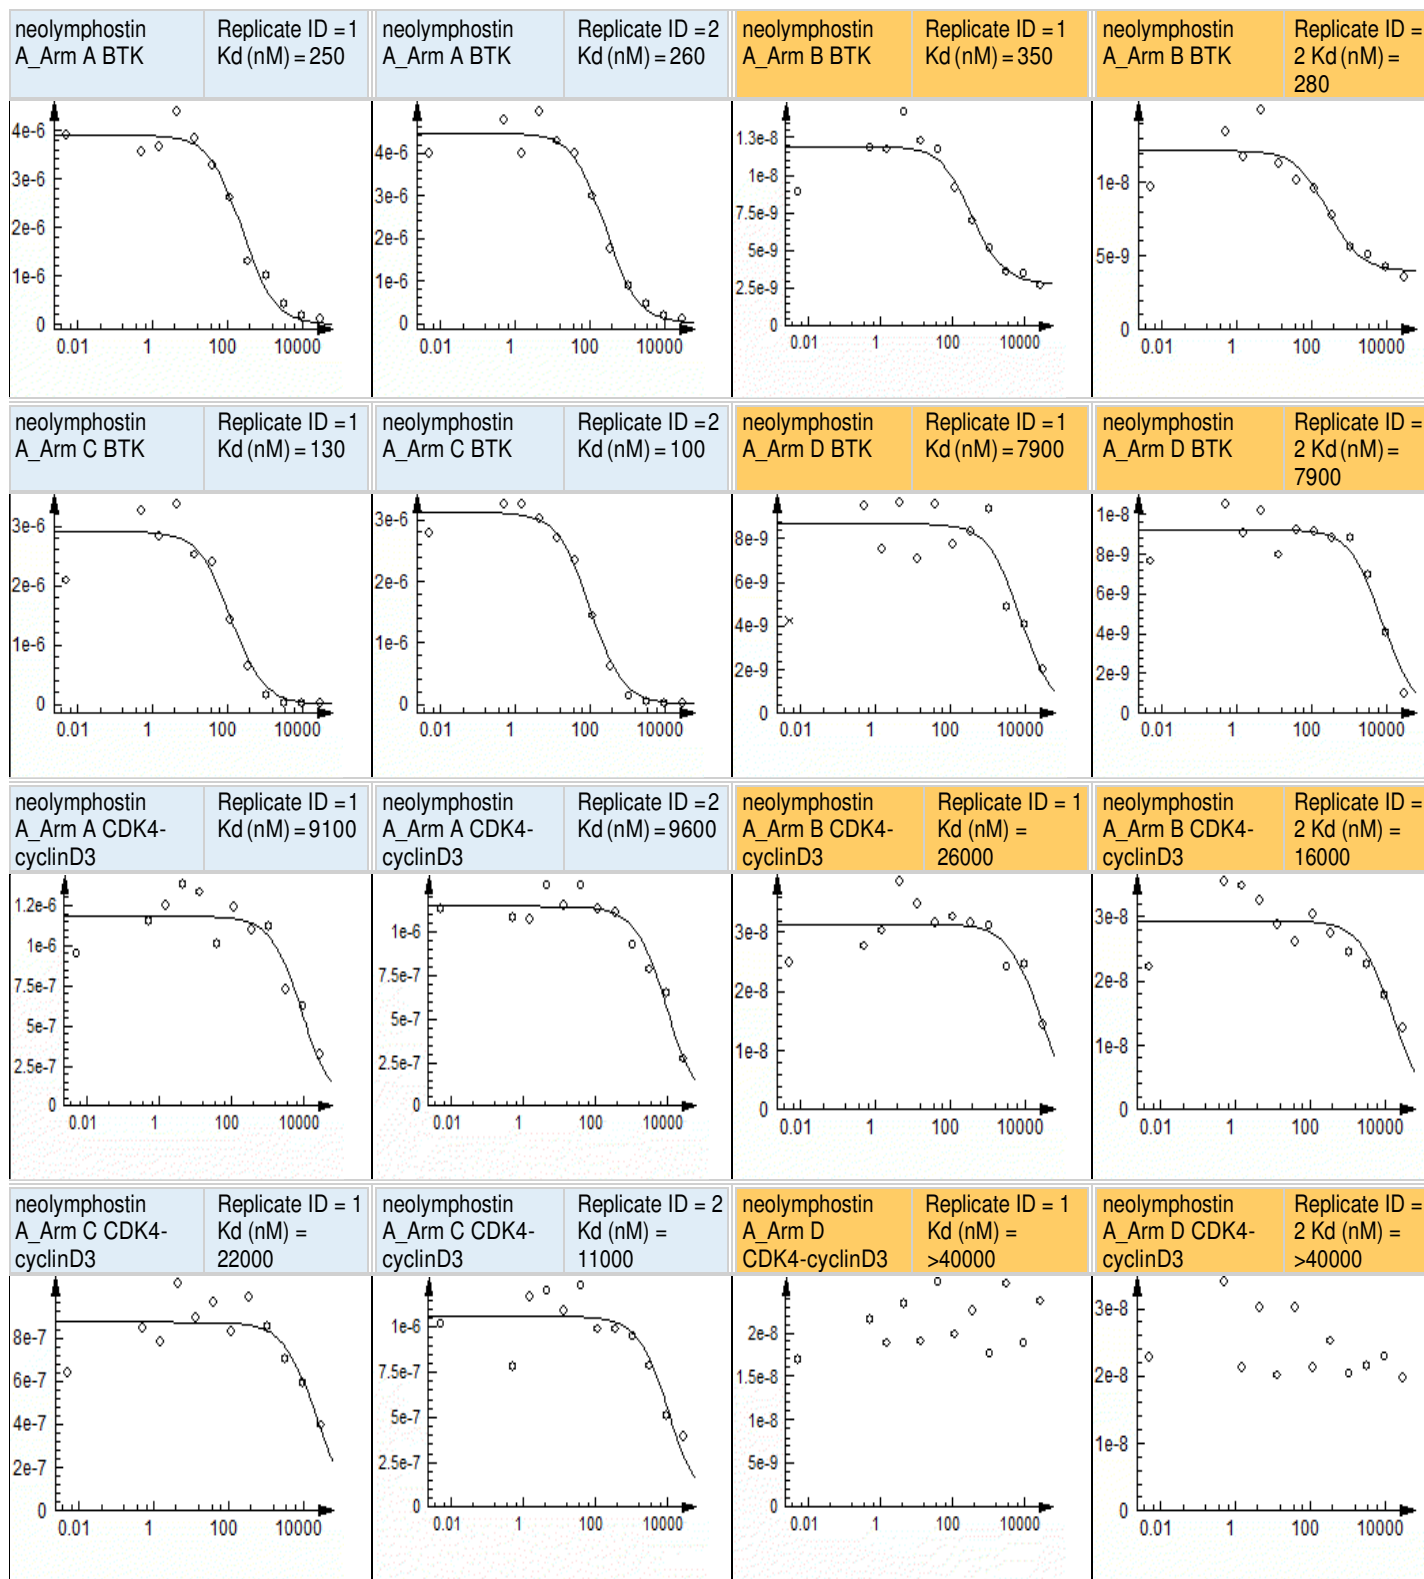

Curve images for dissociation constants ( $K_d$ ) for neolymphostin A and selected kinases under four conditioning experiments (Arms A–D)...(continued)

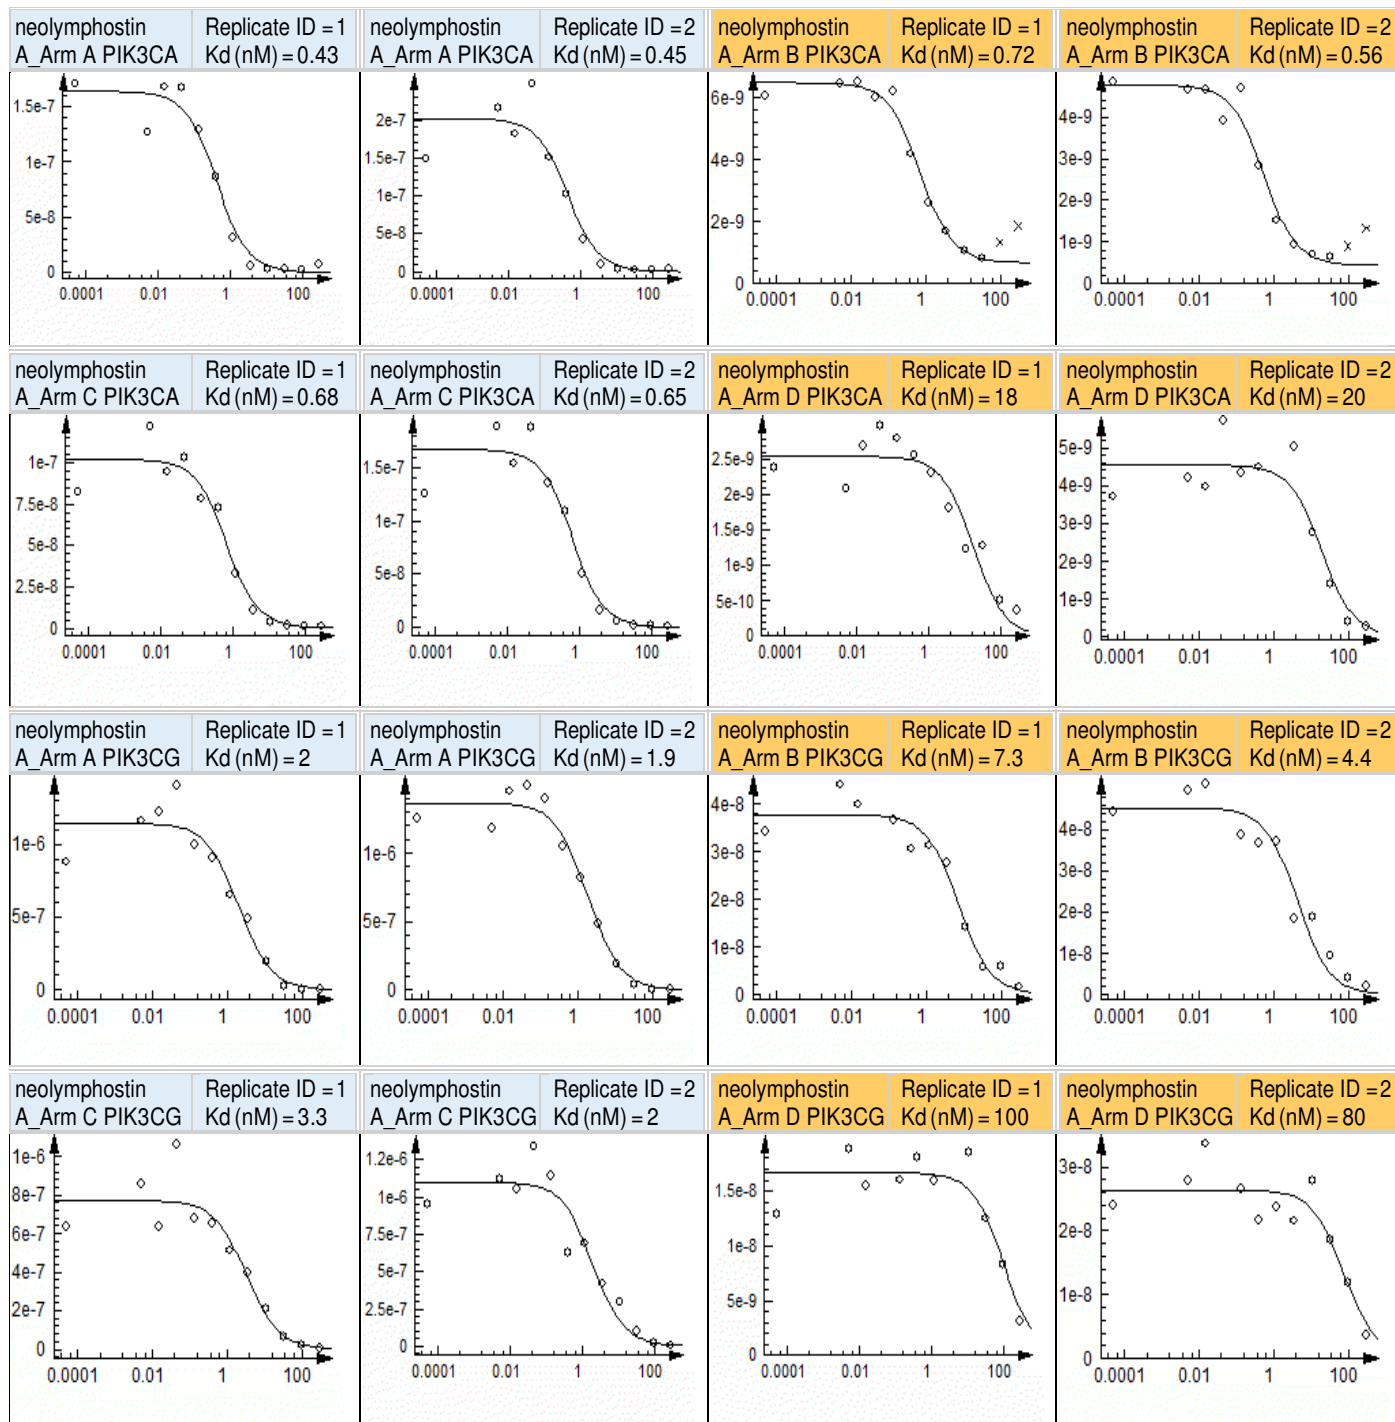

**Figure S5.** Timecourse for covalent modification of PI3K

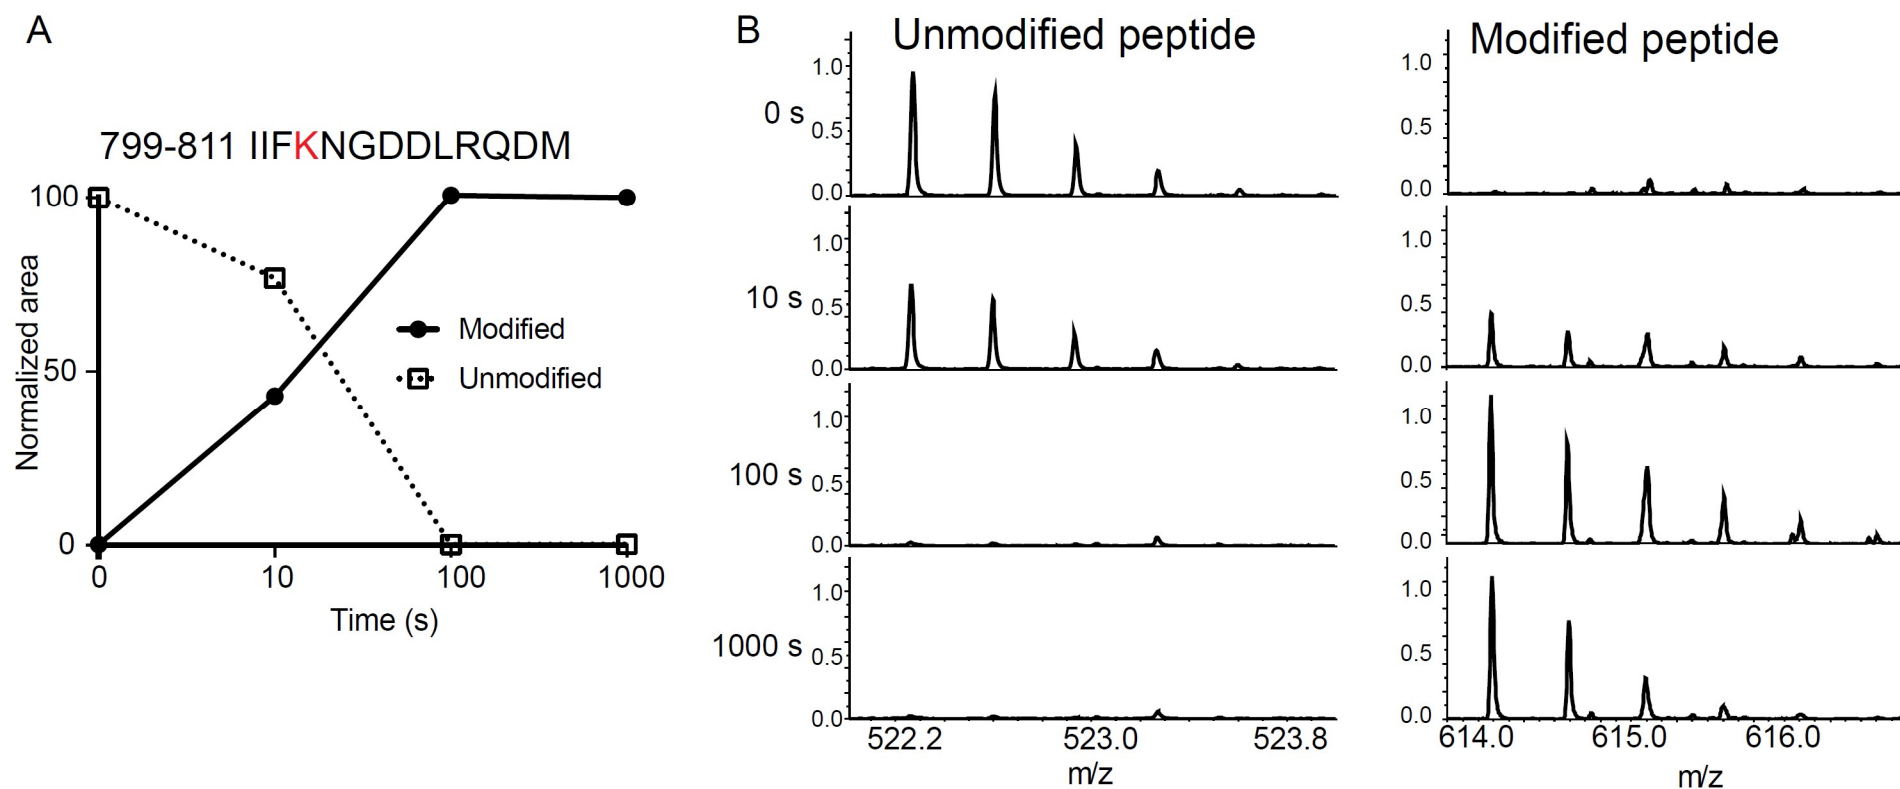

A. The intensity for the modified and unmodified variant of the peptide indicated is shown over a time course of incubation with neolymphostin. B. Raw peptide traces of the unmodified and modified peptide over time.

**Figure S6.** Neolymphostin docked into PI3K $\alpha$

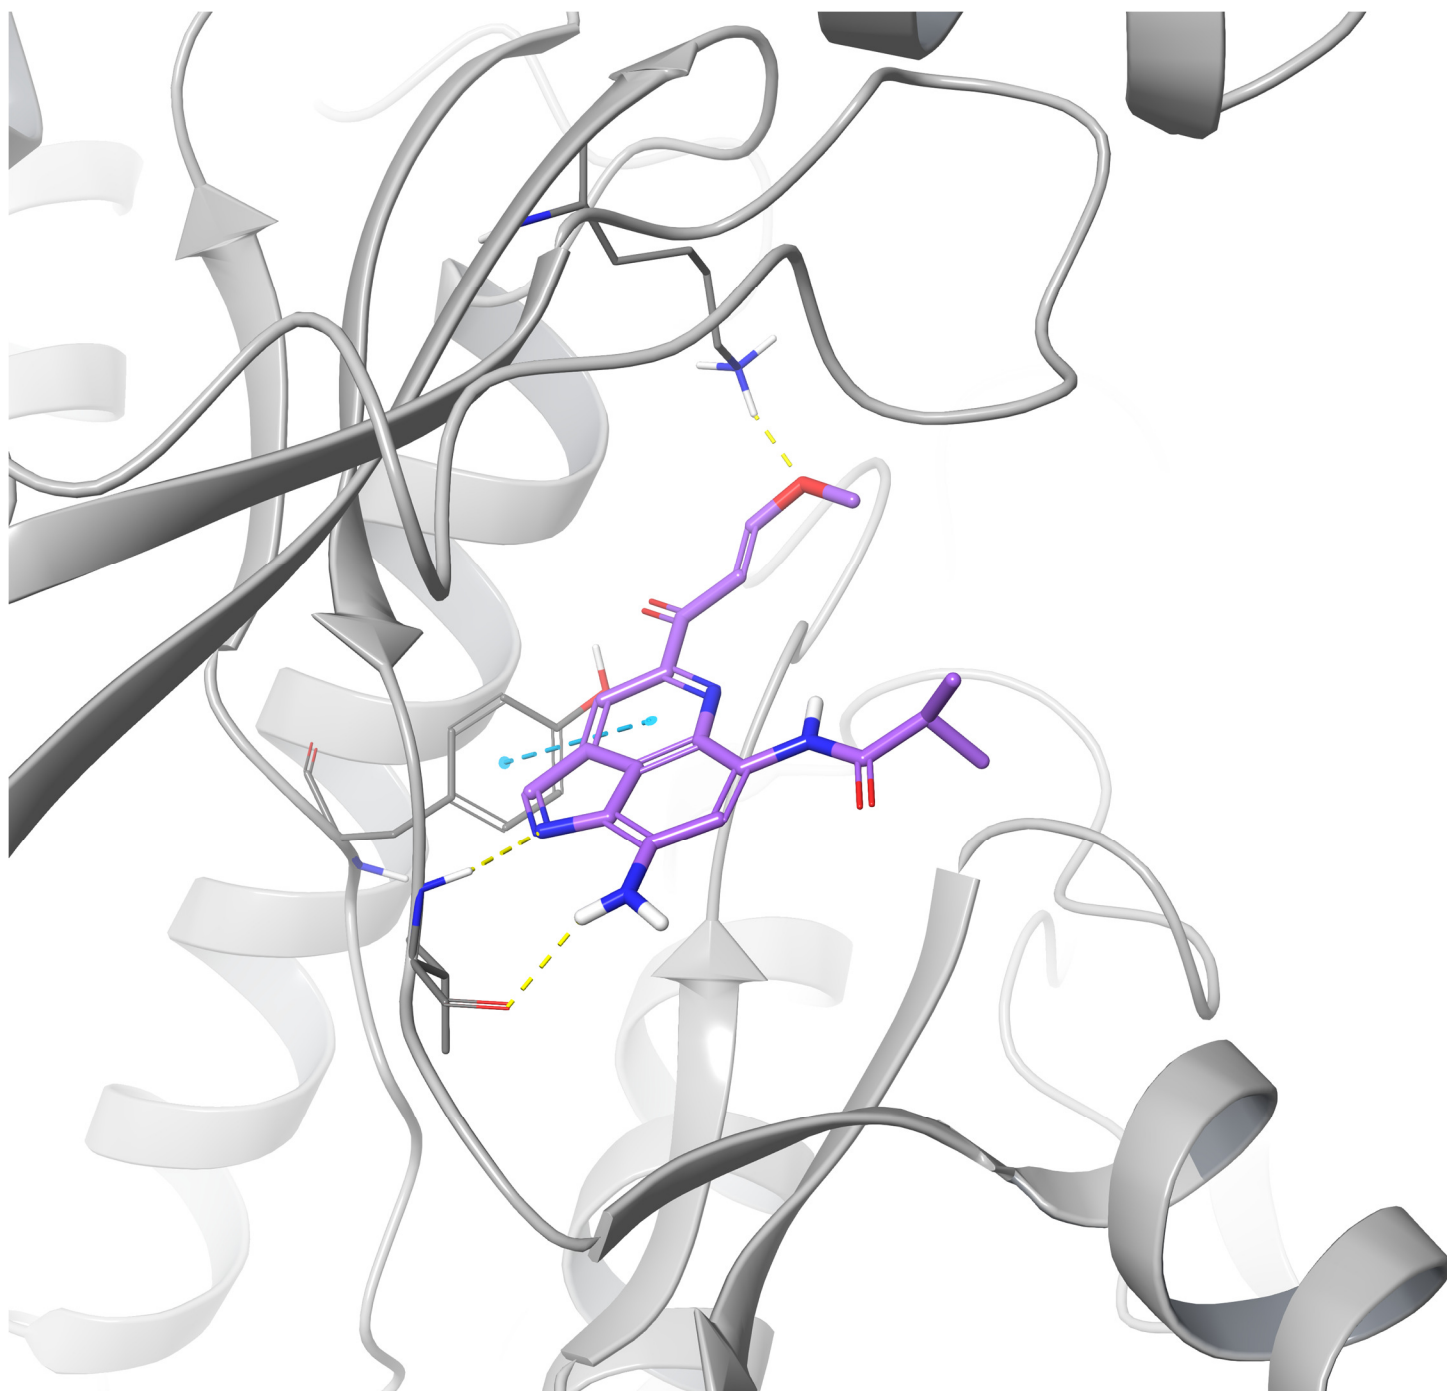

**Figure S7.** Neolymphostin docked into mTOR

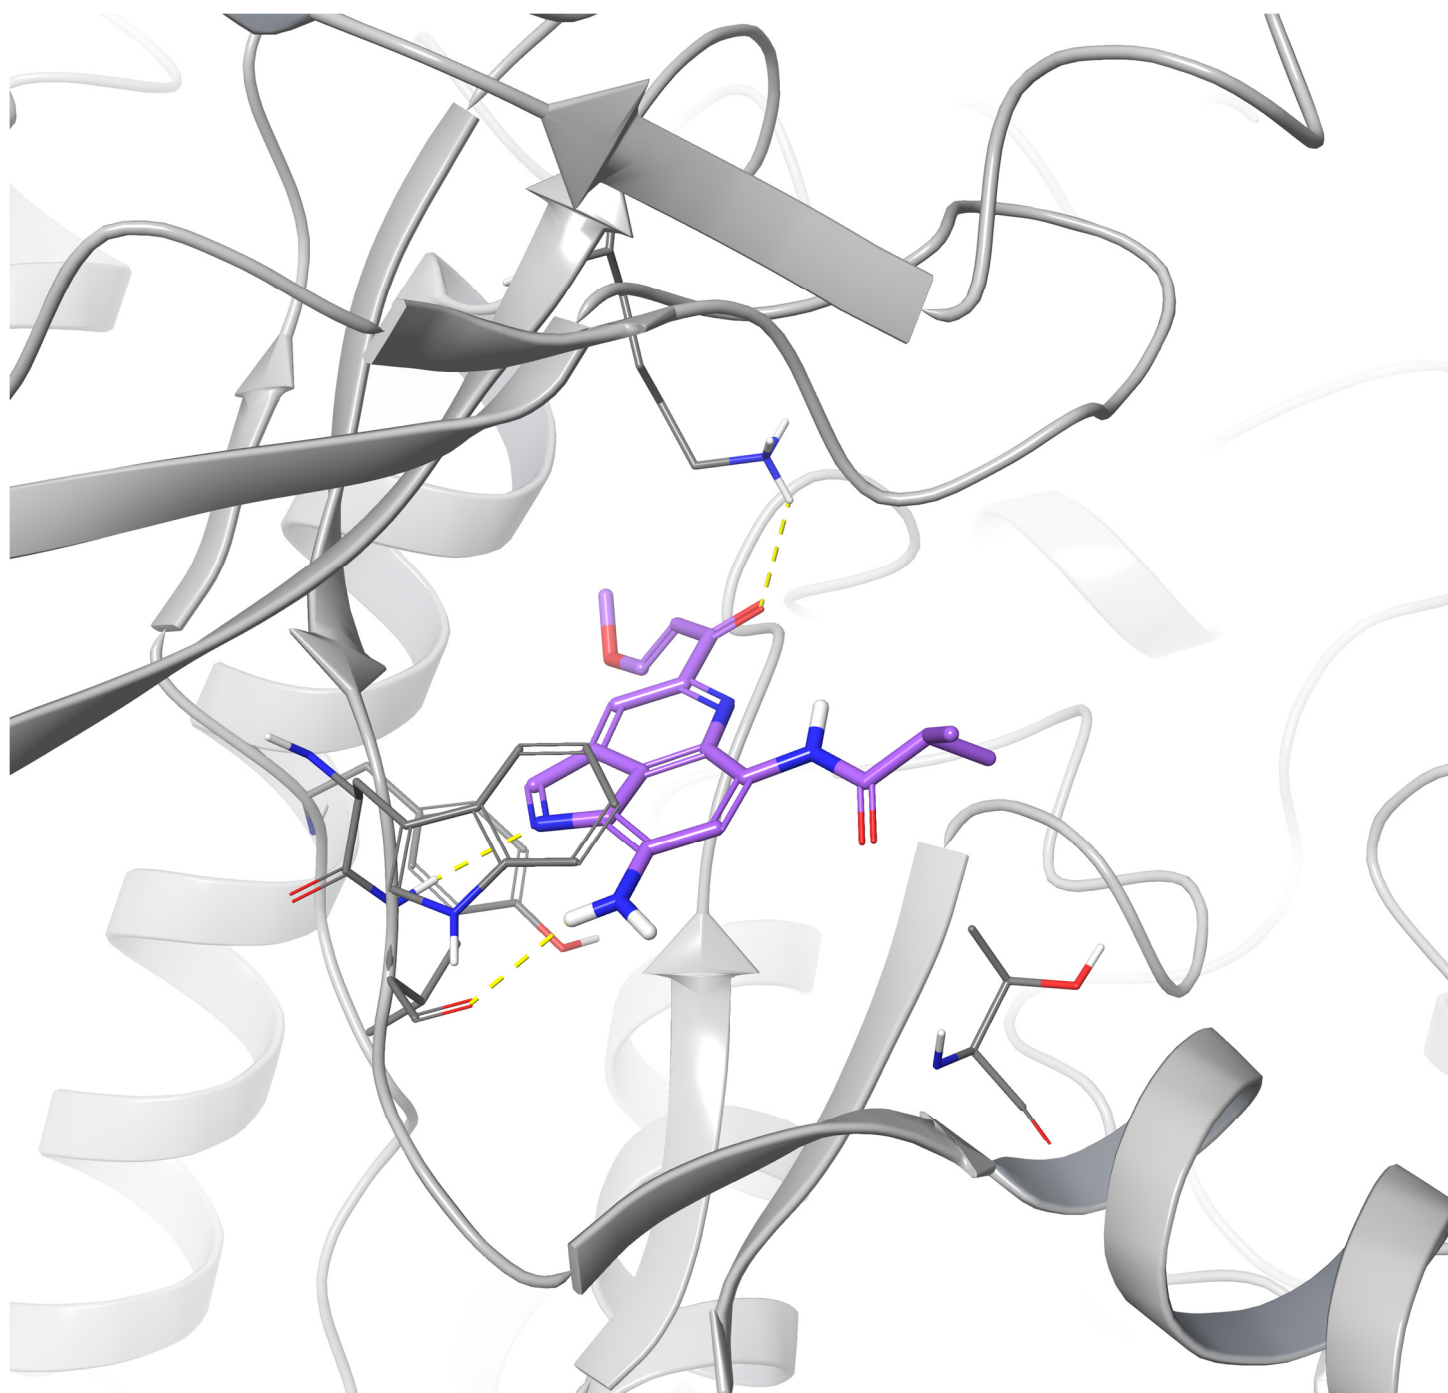

**Figure S8.** Neolymphostin docked into PI3K $\alpha$  (induced fit)

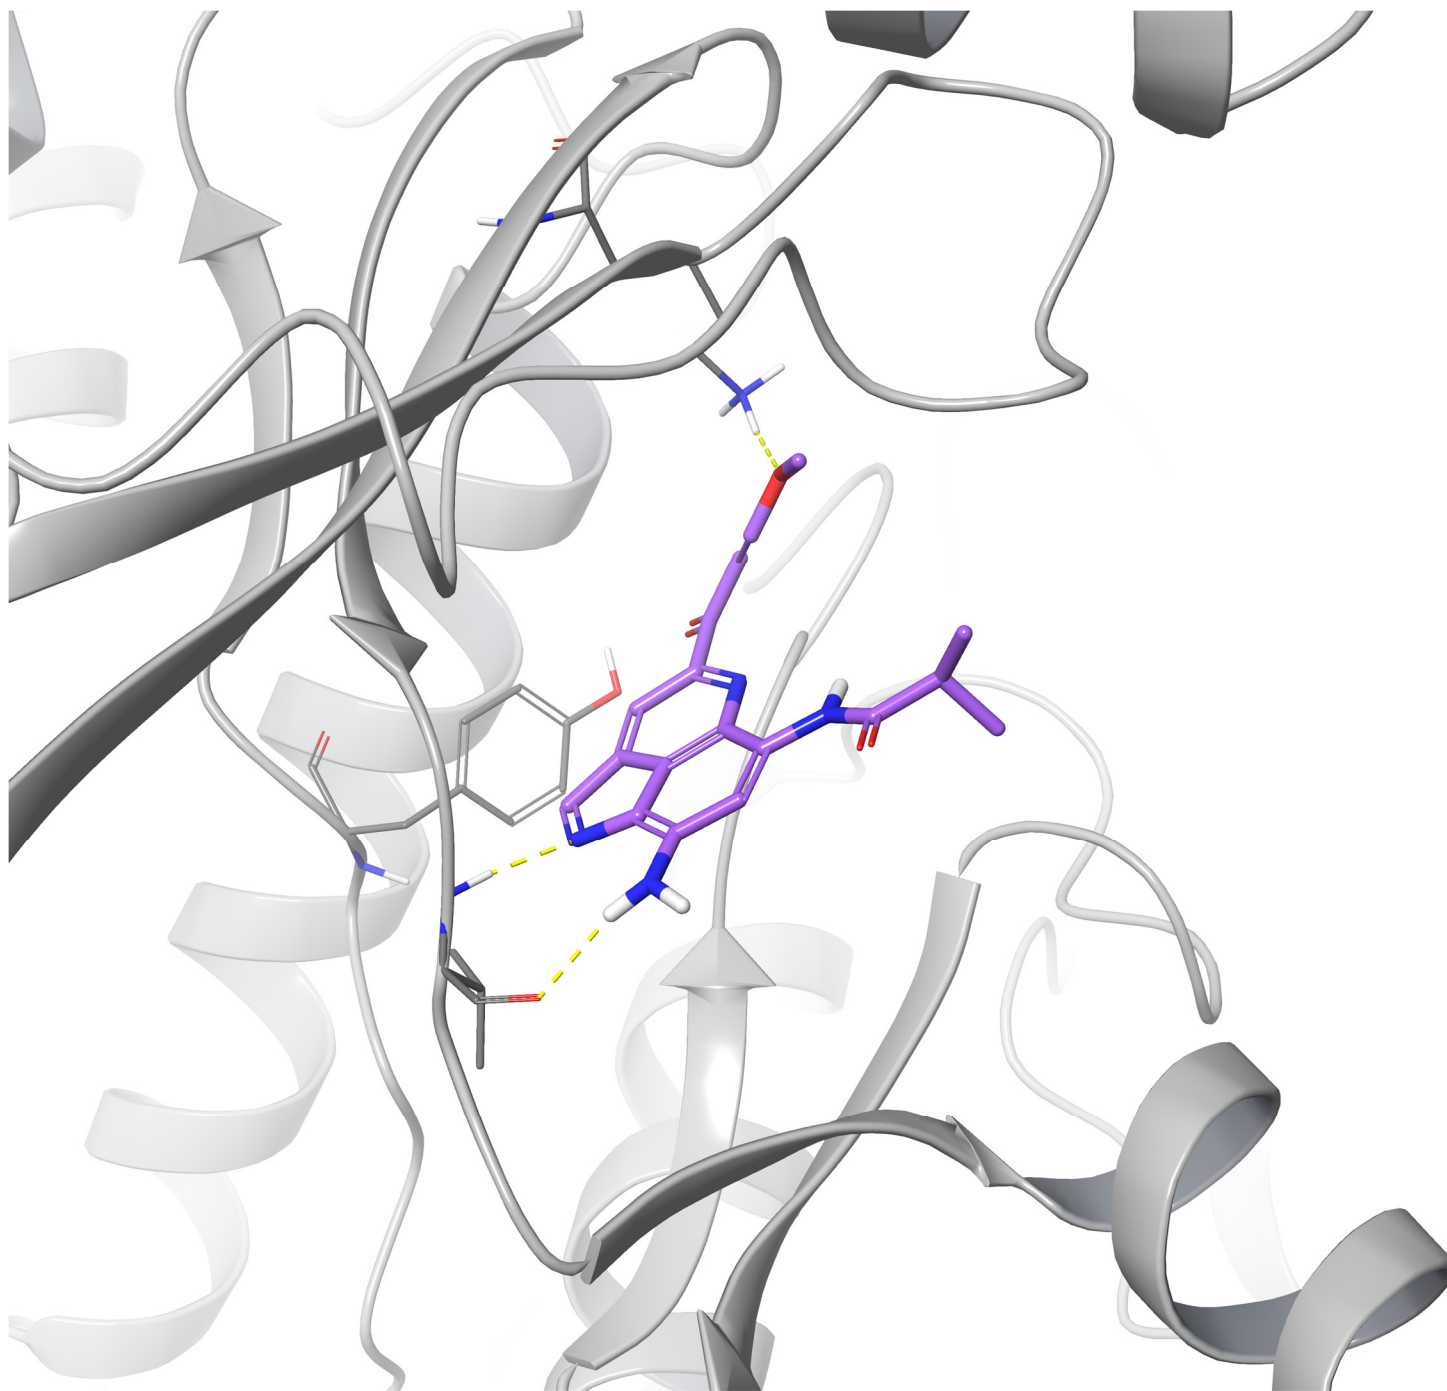

**Figure S9.** Neolymphostin docked into mTOR (induced fit)

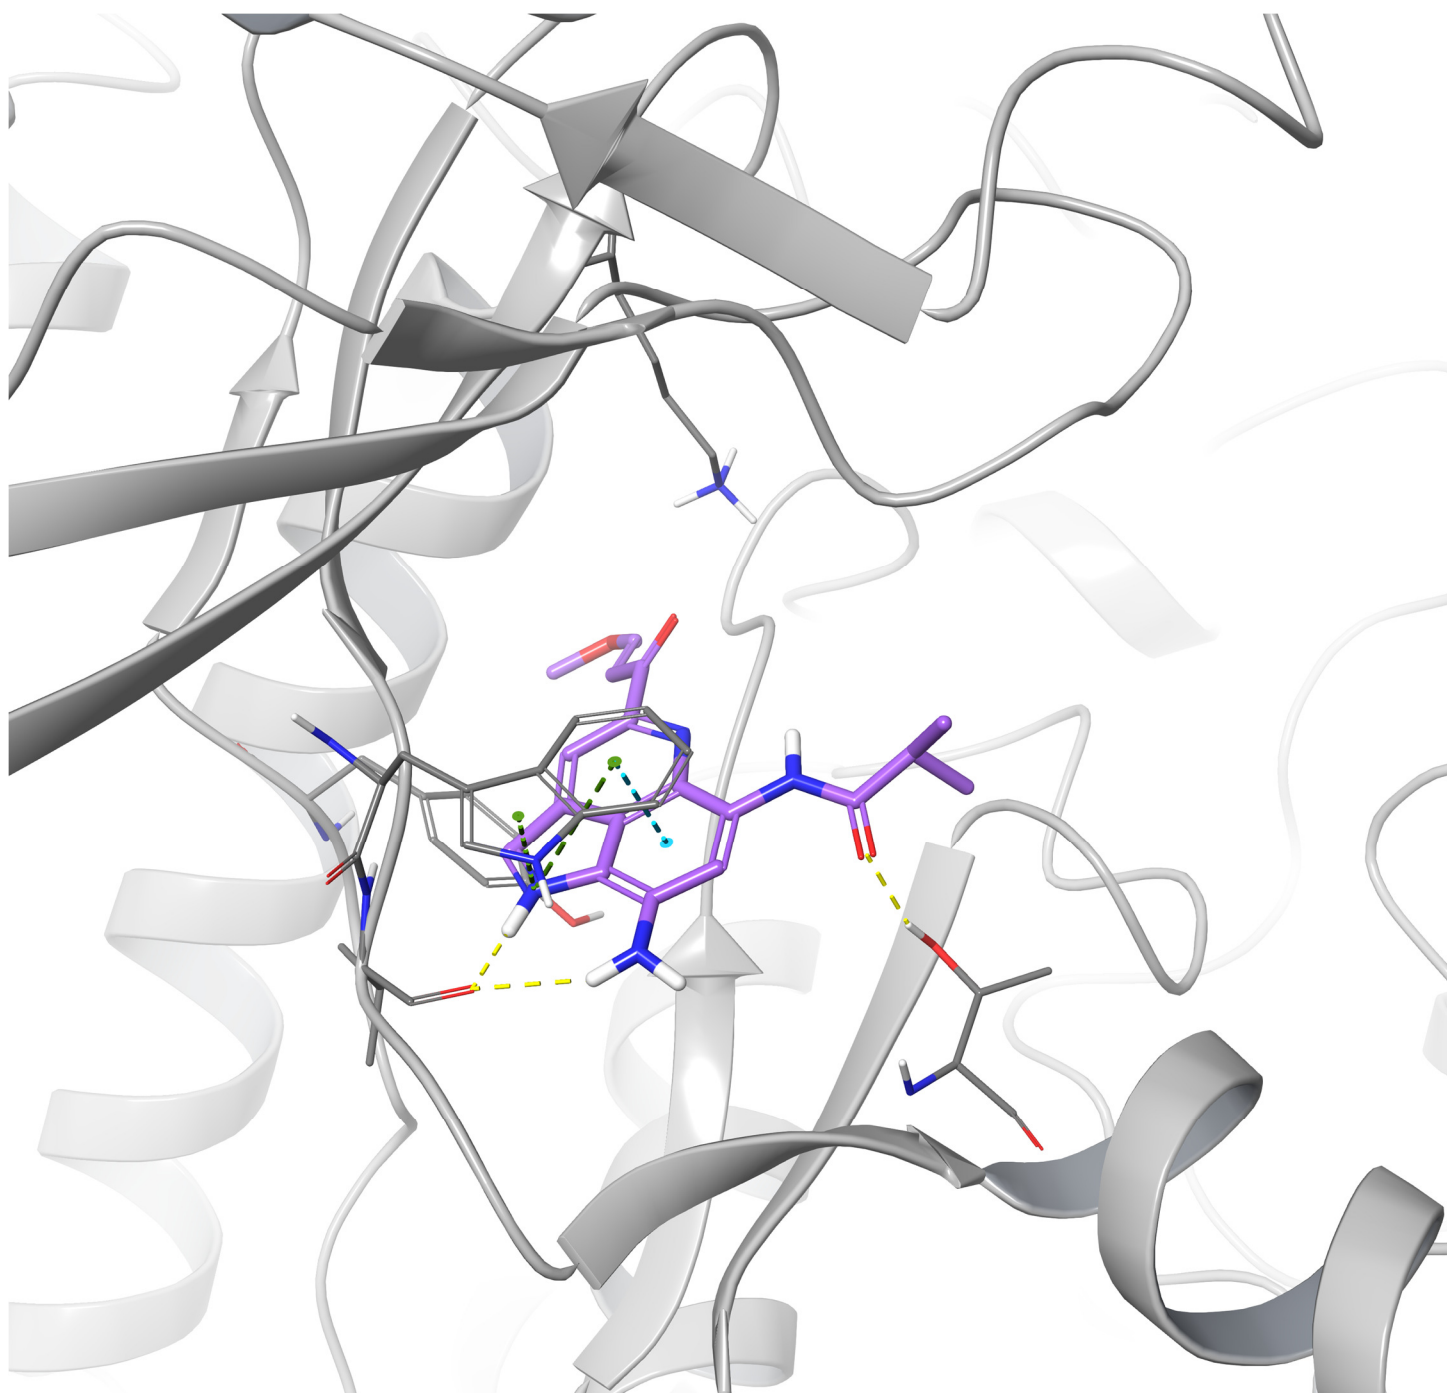

**Figure S10.** Neolymphostin docked into PI3K $\alpha$  (covalent model)

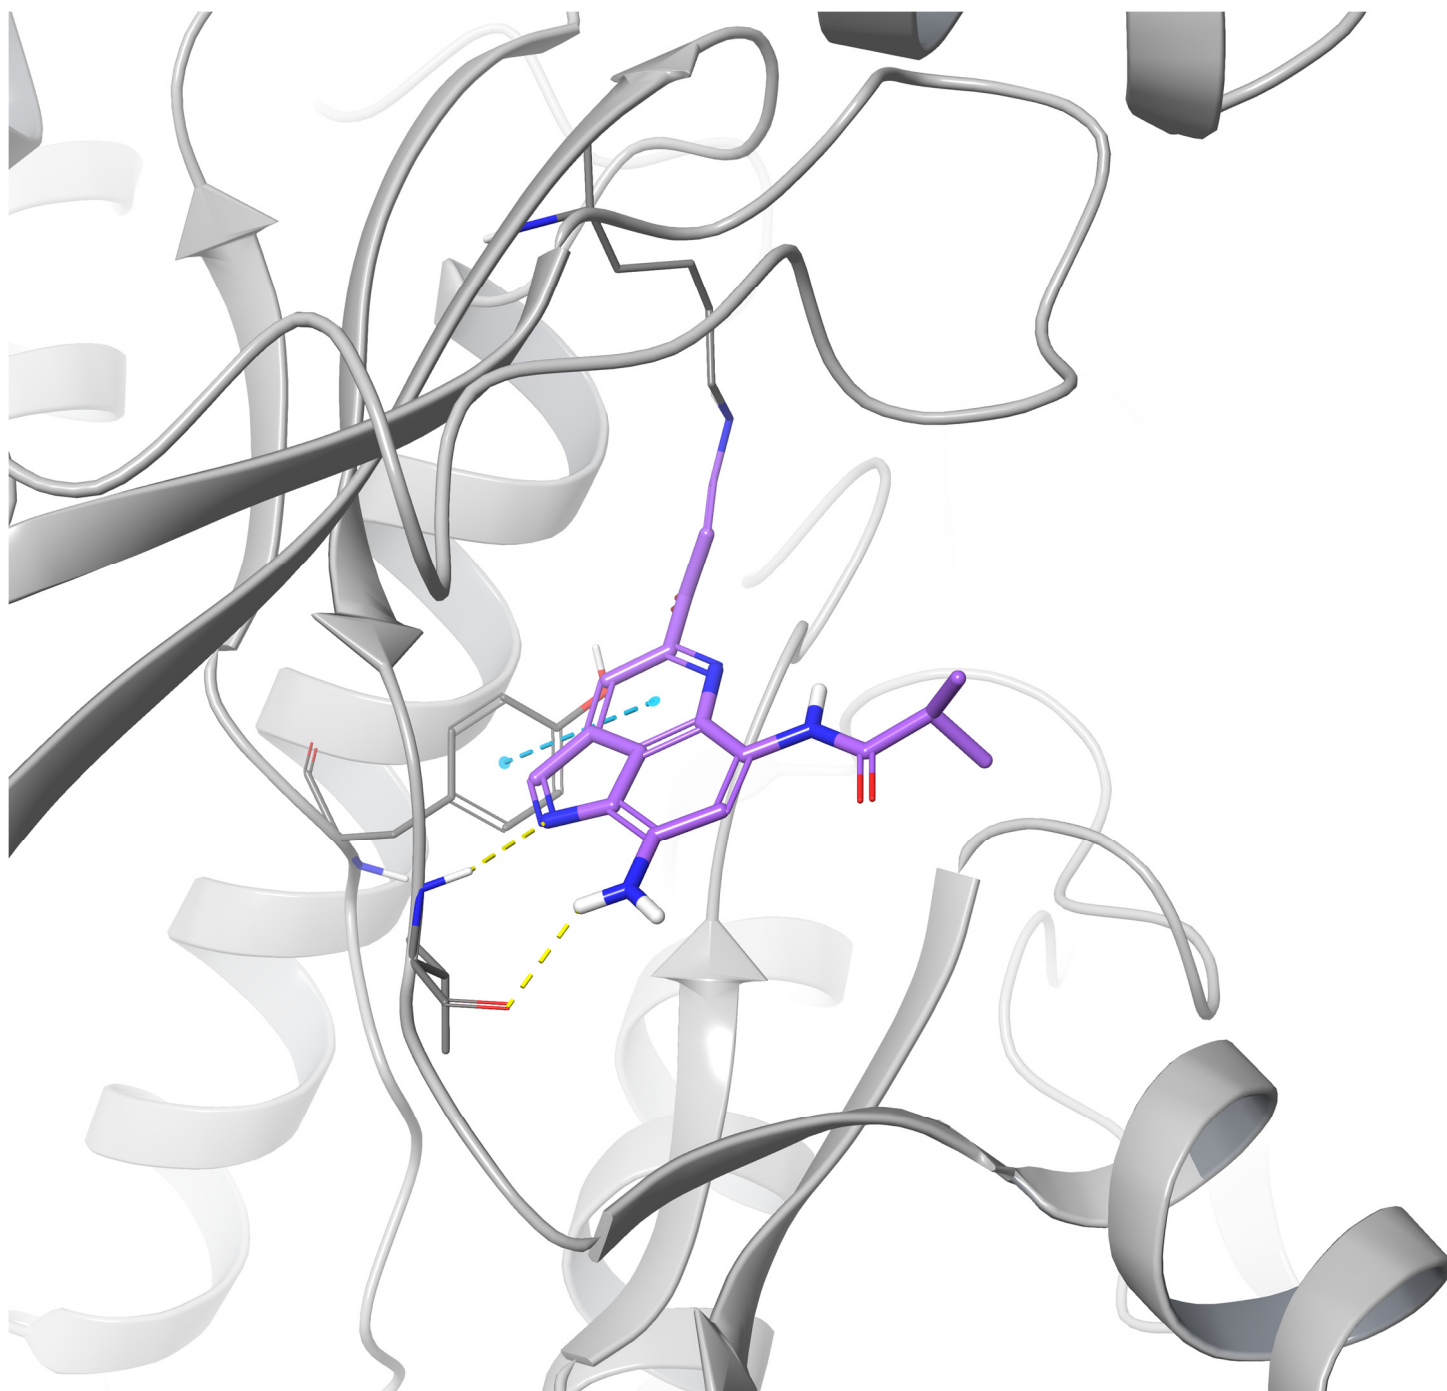





**Figure S11.**  $^1\text{H}$  NMR kinetics data for **6** reacting with  $\text{N}^\alpha$ -acetyl lysine in phosphate-buffered  $\text{D}_2\text{O}$ , pH 8.1,  $25^\circ\text{C}$

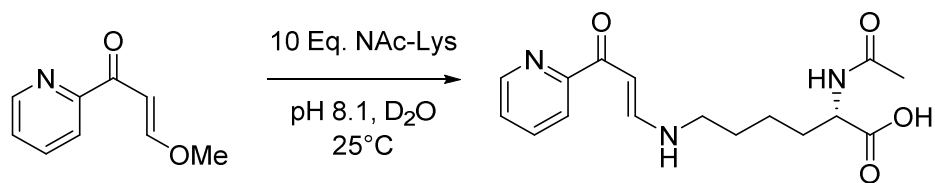

| time, min. | $\ln([\mathbf{6}])$ , 8.46 ppm | $\ln([\mathbf{6}])$ , 7.48 ppm |
|------------|--------------------------------|--------------------------------|
| 5          | -6.918118066                   | -6.918566195                   |
| 10         | -6.96067768                    | -6.960123264                   |
| 15         | -7.032918422                   | -7.037289331                   |
| 20         | -7.044091723                   | -7.03558865                    |
| 25         | -7.148035113                   | -7.083645945                   |
| 30         | -7.125757431                   | -7.128426641                   |
| 35         | -7.188657664                   | -7.205387682                   |
| 40         | -7.308078988                   | -7.184008656                   |
| 45         | -7.338538195                   | -7.3678788                     |
| 50         | -7.301659565                   | -7.318497444                   |
| 55         | -7.517132576                   | -7.437014604                   |
| 60         | -7.6102922                     | -7.448322872                   |

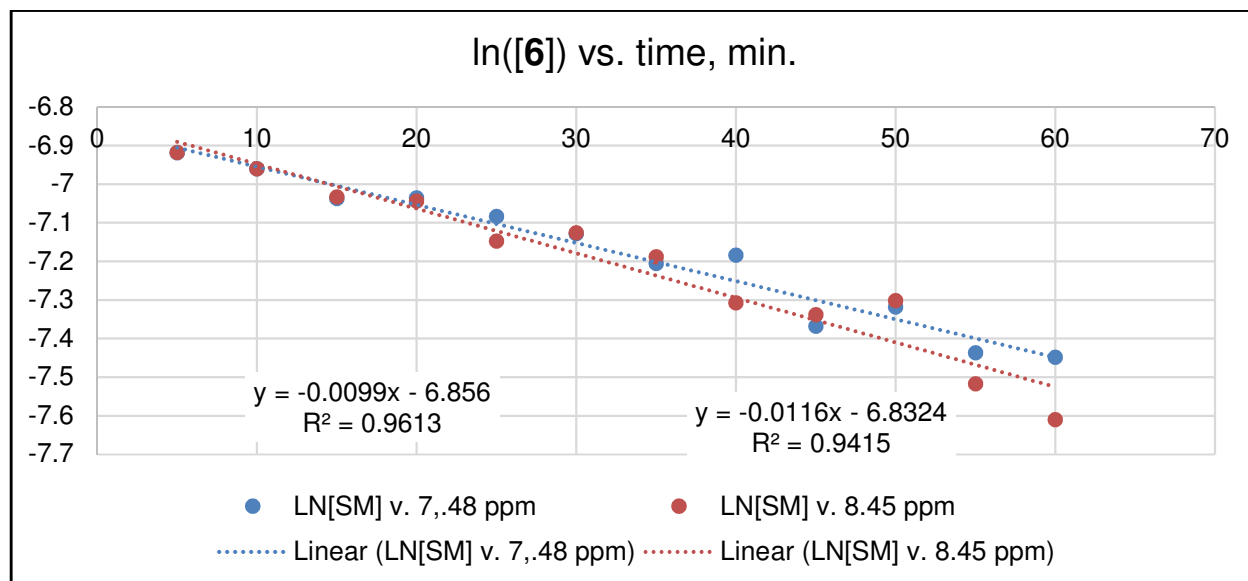

|                                       | signal at 8.46 ppm | signal at 7.48 ppm | average               |
|---------------------------------------|--------------------|--------------------|-----------------------|
| slope of $\ln([\mathbf{6}])$ vs. time | -0.0116            | -0.0099            | -0.01075 <sup>a</sup> |
| calculated half-life, min.            | 59.8               | 70.0               | 64.5 <sup>b</sup>     |

<sup>a</sup>Average of slopes of each linear regression line

<sup>b</sup>Calculated by  $t_{1/2} = \ln(2)/(-1 \cdot \text{average slope})$

Stacked  $^1\text{H}$  NMR spectra of **6** reacting with  $\text{N}^\alpha$ -acetyl lysine in phosphate-buffered  $\text{D}_2\text{O}$ , pH 8.1,  $25^\circ\text{C}$

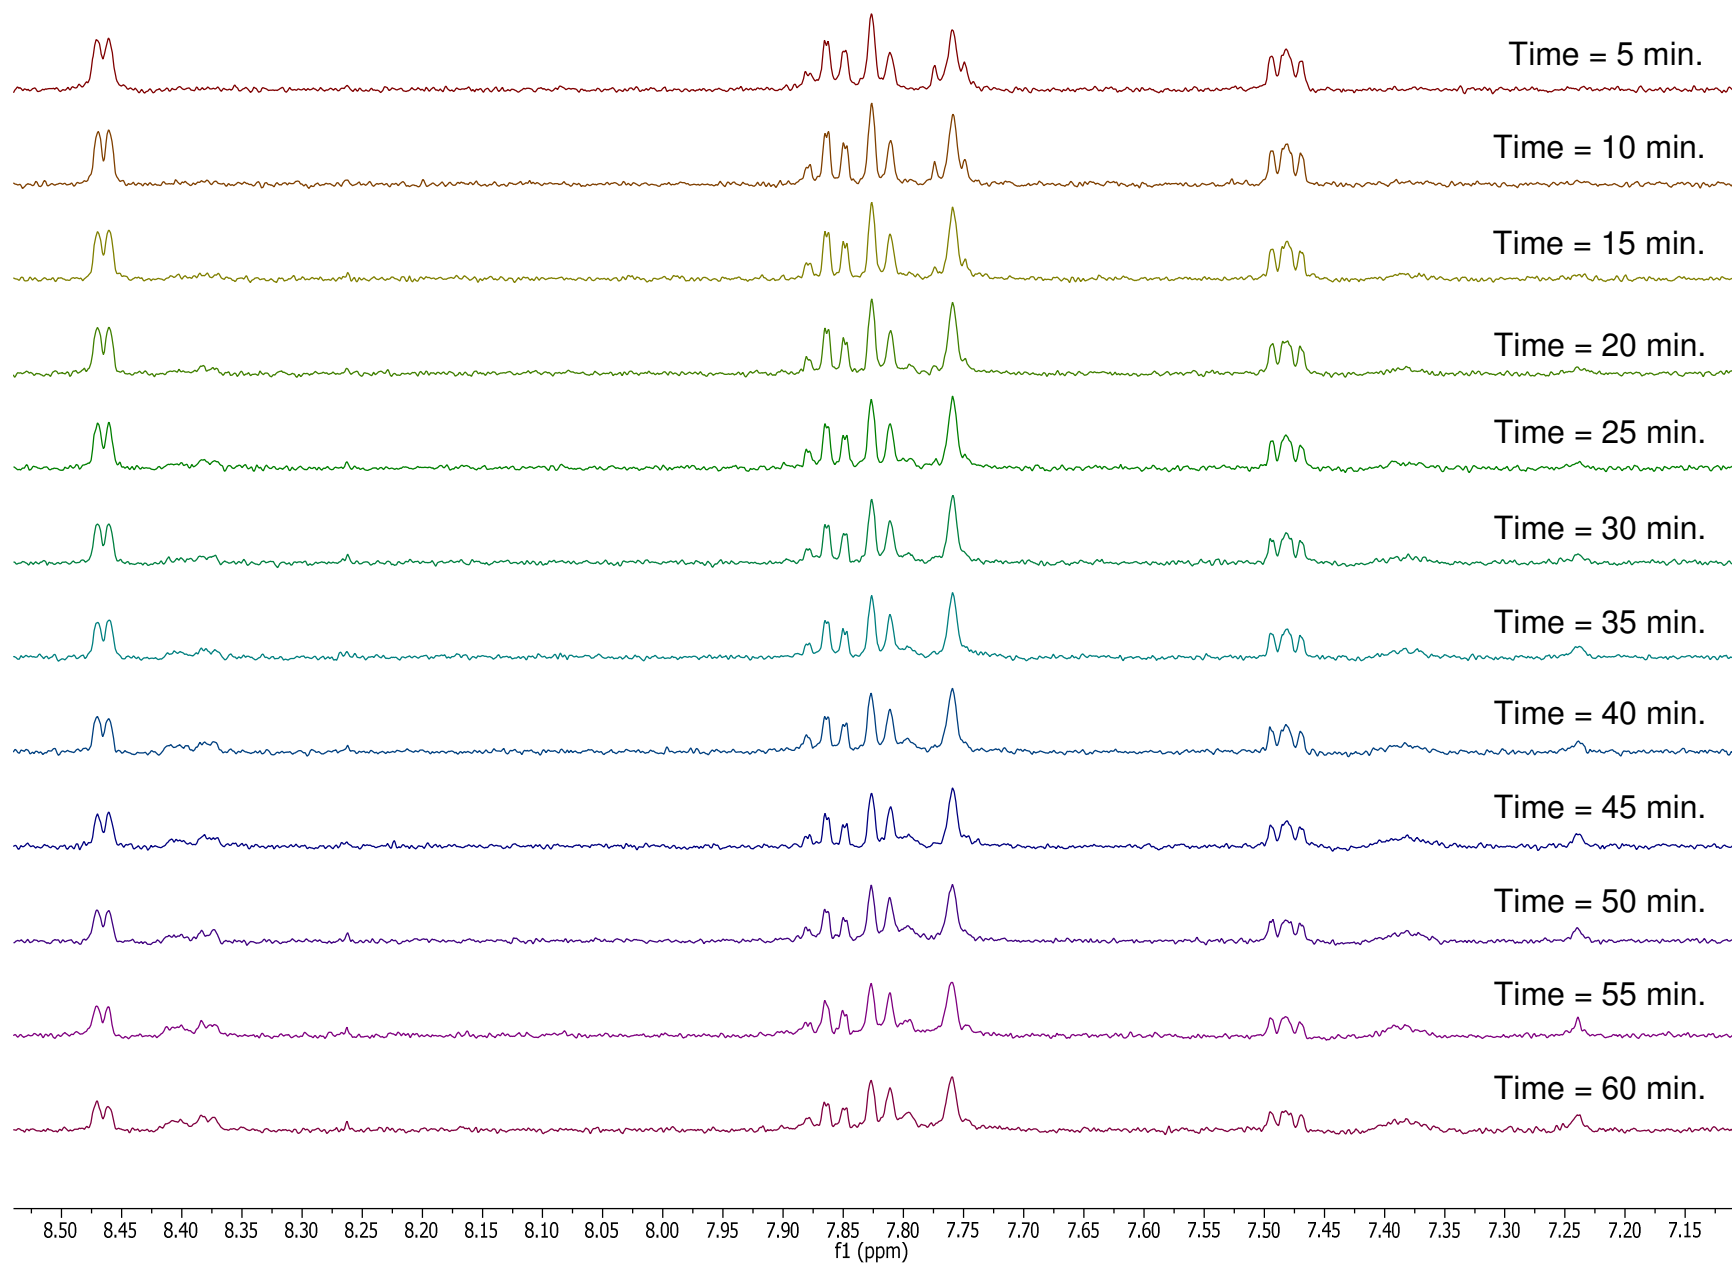

**Table S9.** NMR spectral data for **8** in phosphate-buffered D<sub>2</sub>O, pH 8.1, at 500 MHz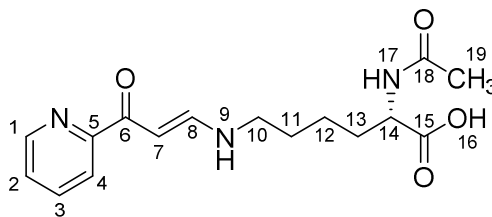

| Position # | $\delta_{\text{H}}$ (mult., J(Hz)) | $\delta_{\text{C}}^{\text{b}}$ | COSY              | HMBC                         |
|------------|------------------------------------|--------------------------------|-------------------|------------------------------|
| 1          | 8.39 (dd, 13.5, 4.4)               | 149.8                          | 2                 | 3                            |
| 2          | 7.39 (m)                           | 127.8                          | 1, 3              | 4                            |
| 3          | 7.80 (m, 7.5)                      | 139.9                          | 2, 4              | 1, 5                         |
| 4          | 7.76 (m, 7.5)                      | 123.5                          | 3                 | 2                            |
| 5          | ---                                | 156.0                          | ---               | ---                          |
| 6          | ---                                | 188.0                          | ---               | ---                          |
| 7          | --- <sup>a</sup>                   | 90.6                           | ---               | ---                          |
| 8          | 7.24 (s)                           | 160.0                          | ---               | 6, 7, 10                     |
| 9-NH       | --- <sup>a</sup>                   | ---                            | ---               | ---                          |
| 10         | 3.25 (td, 6.5, 2.3)                | 50.4                           | 11                | 8, 11, 12                    |
| 11         | 1.52 (m)                           | 27.8                           | 10, 12            | 10, 12                       |
| 12         | 1.23 (m)                           | 23.6                           | 11, 13            | 10, 11, 13, 14               |
| 13         | a 1.52 (m)<br>b 1.63 (m)           | 32.5                           | 14<br>12, 13a, 14 | 11, 12, 14, 15<br>12, 14, 15 |
| 14         | 3.95 (m)                           | 56.4                           | 13a, 13b          | 12, 13, 15                   |
| 15         | ---                                | 180.4                          | ---               | ---                          |
| 16-OH      | --- <sup>a</sup>                   | ---                            | ---               | ---                          |
| 17-NH      | --- <sup>a</sup>                   | ---                            | ---               | ---                          |
| 18         | ---                                | 174.8                          | ---               | ---                          |
| 19         | 1.81 (s)                           | 23.2                           | ---               | 18                           |

<sup>a</sup> Proton signals were not observed due to exchange with deuterium.

<sup>b</sup> Carbon chemical shifts were based on HSQC and HMBC data.

<sup>1</sup>H NMR (500 MHz, phosphate-buffered D<sub>2</sub>O) of **8**

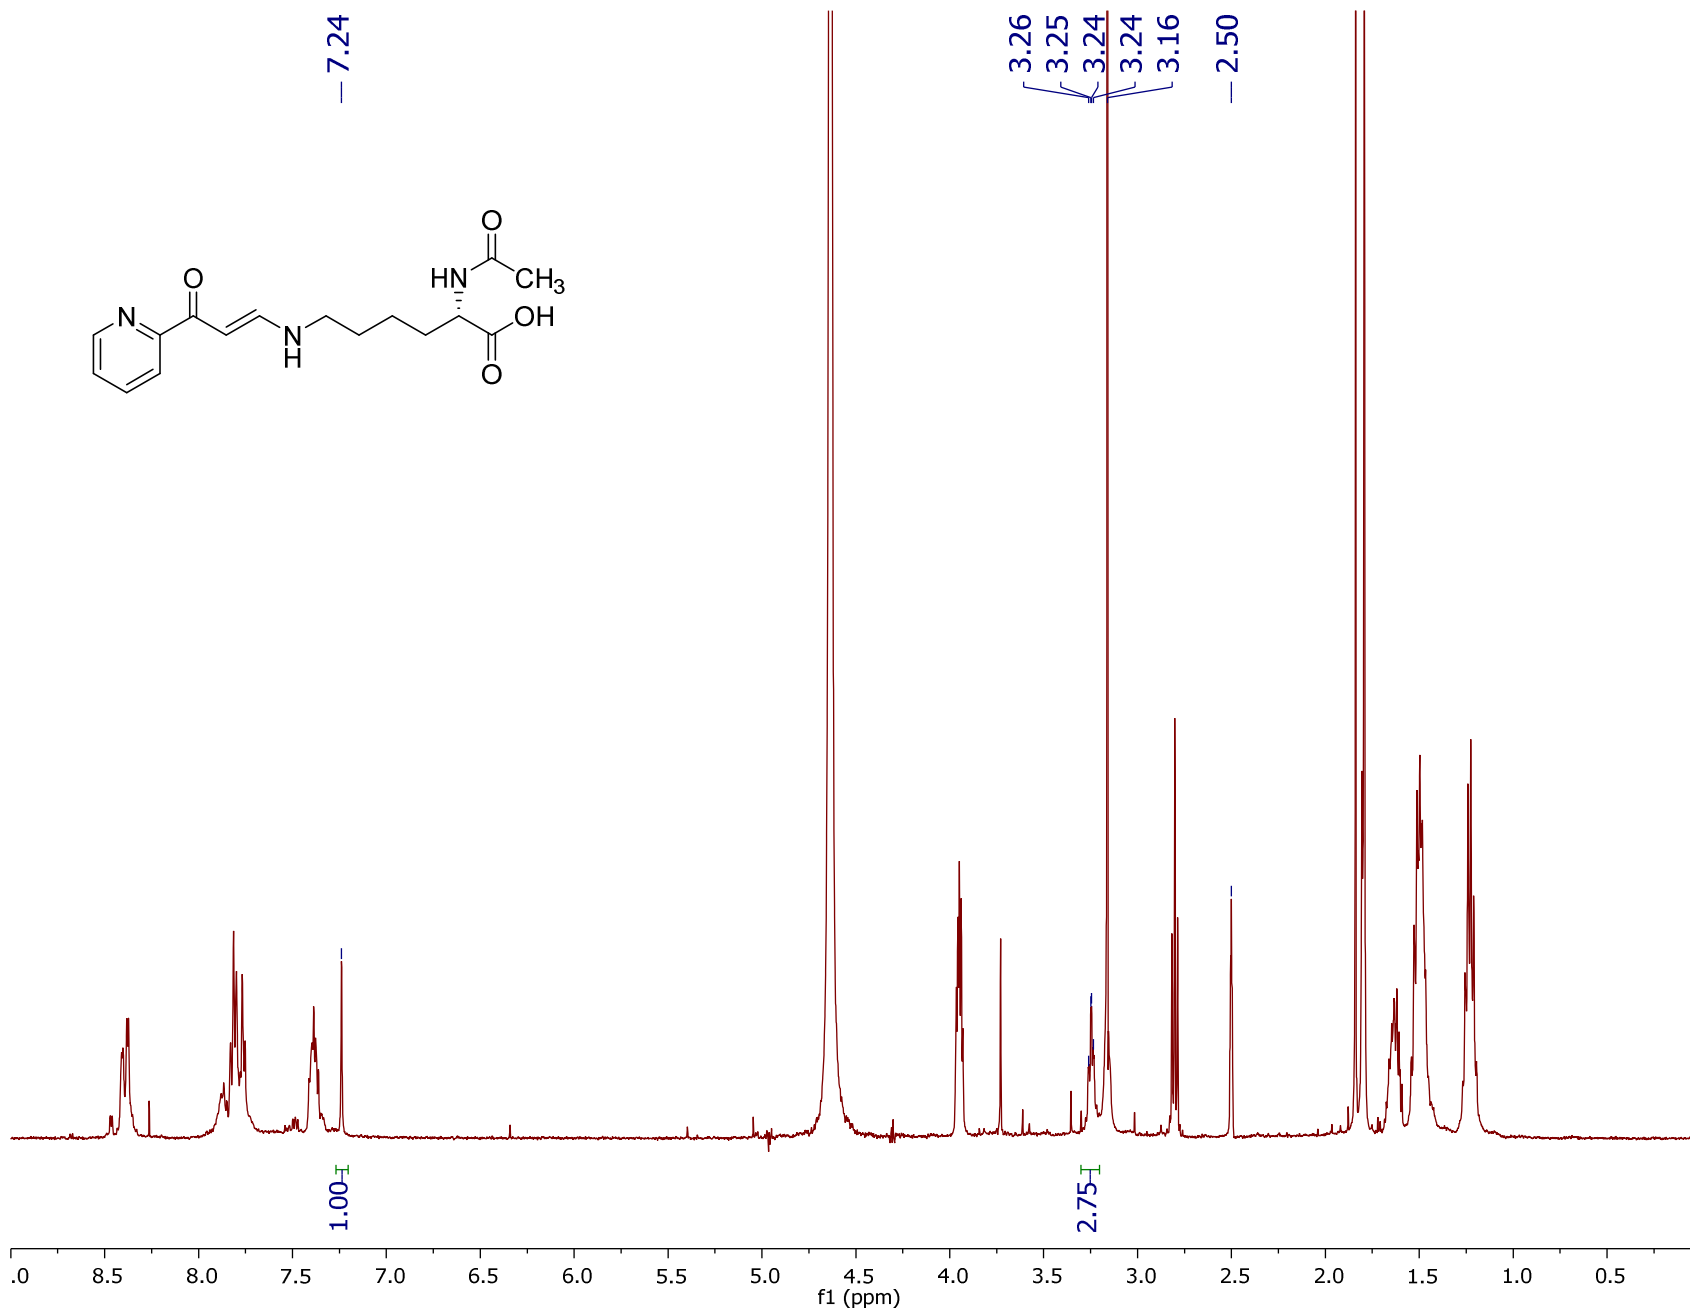

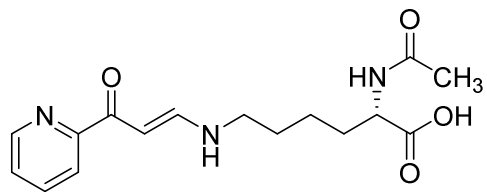

COSY NMR (500 MHz, phosphate-buffered D<sub>2</sub>O) of **8**

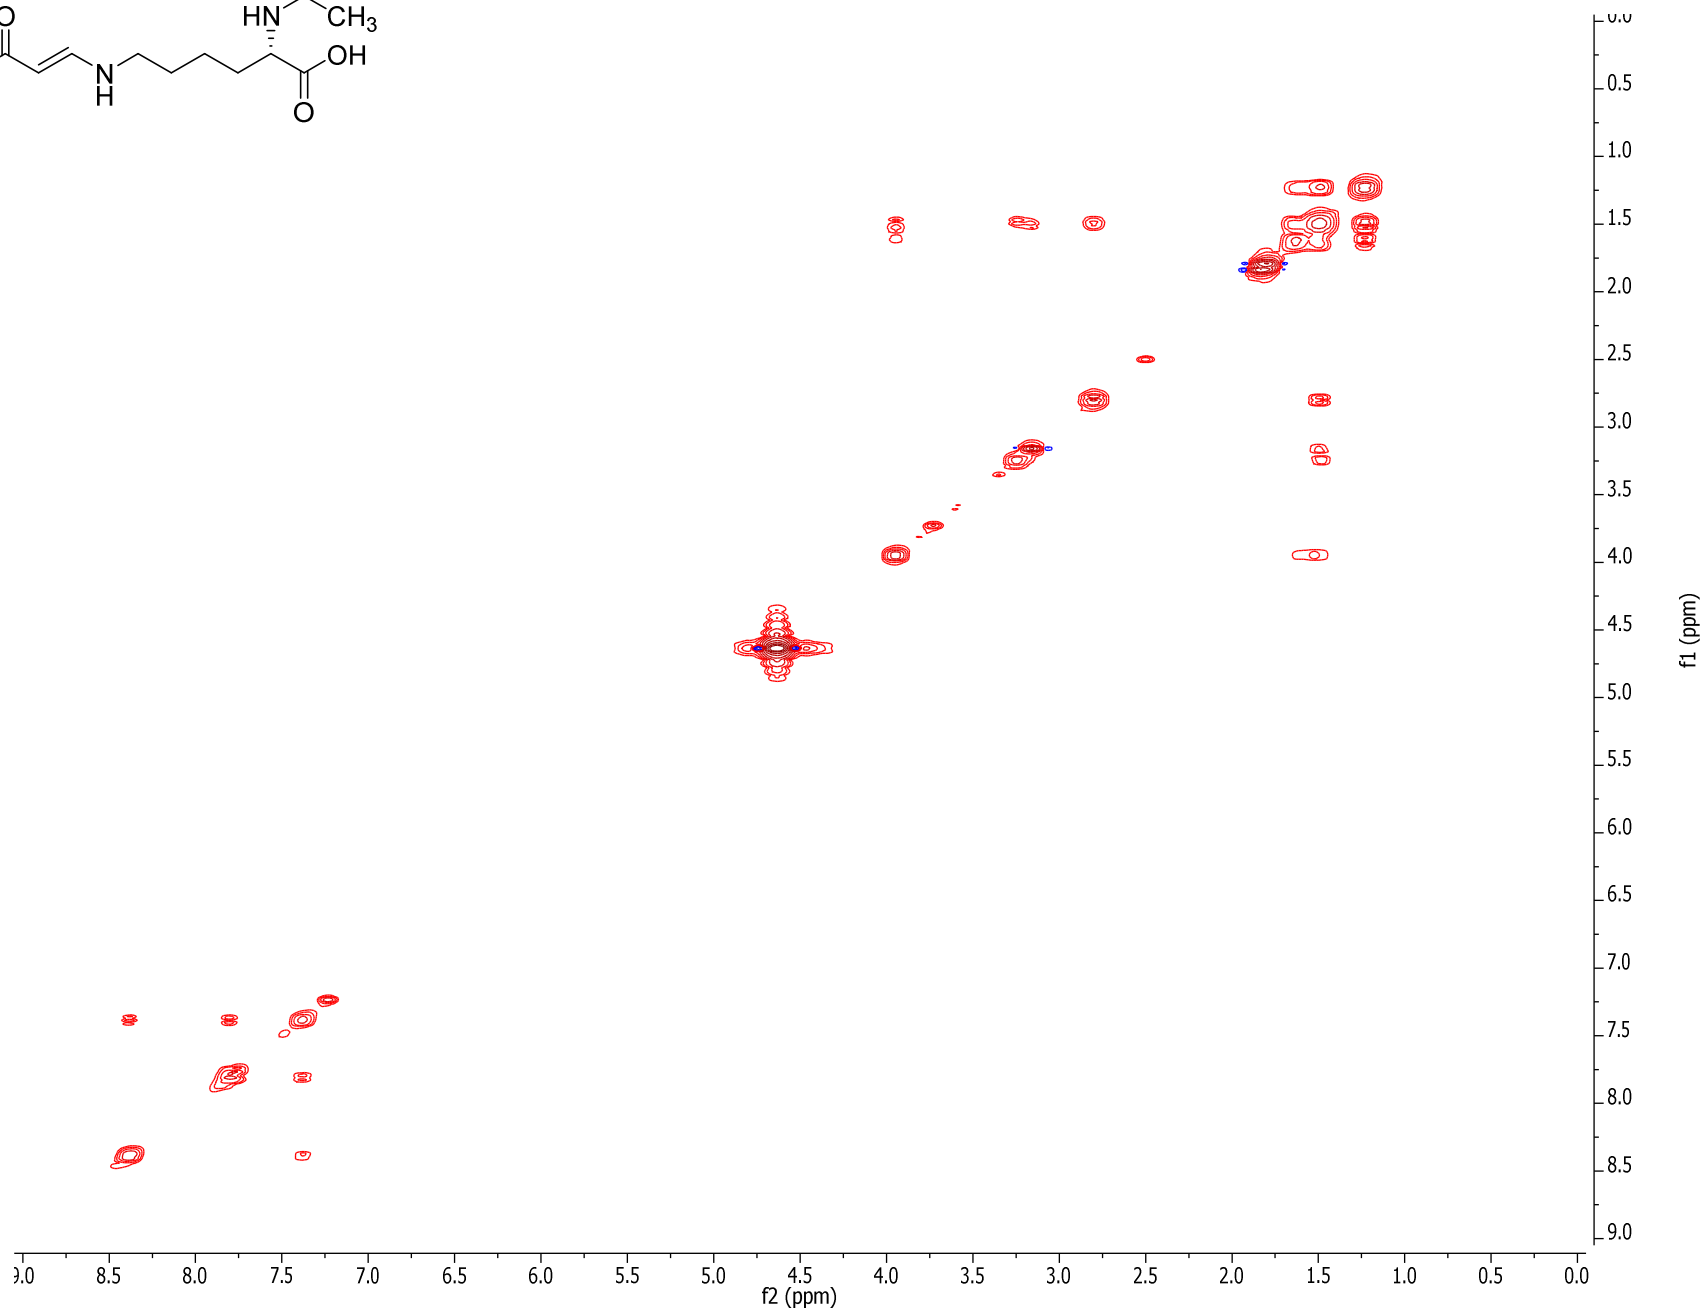

HSQC NMR (500 MHz, phosphate-buffered D<sub>2</sub>O) of **8**

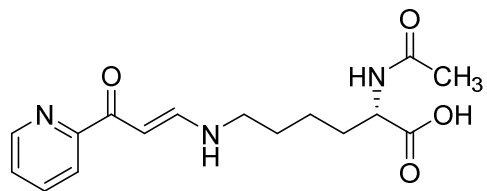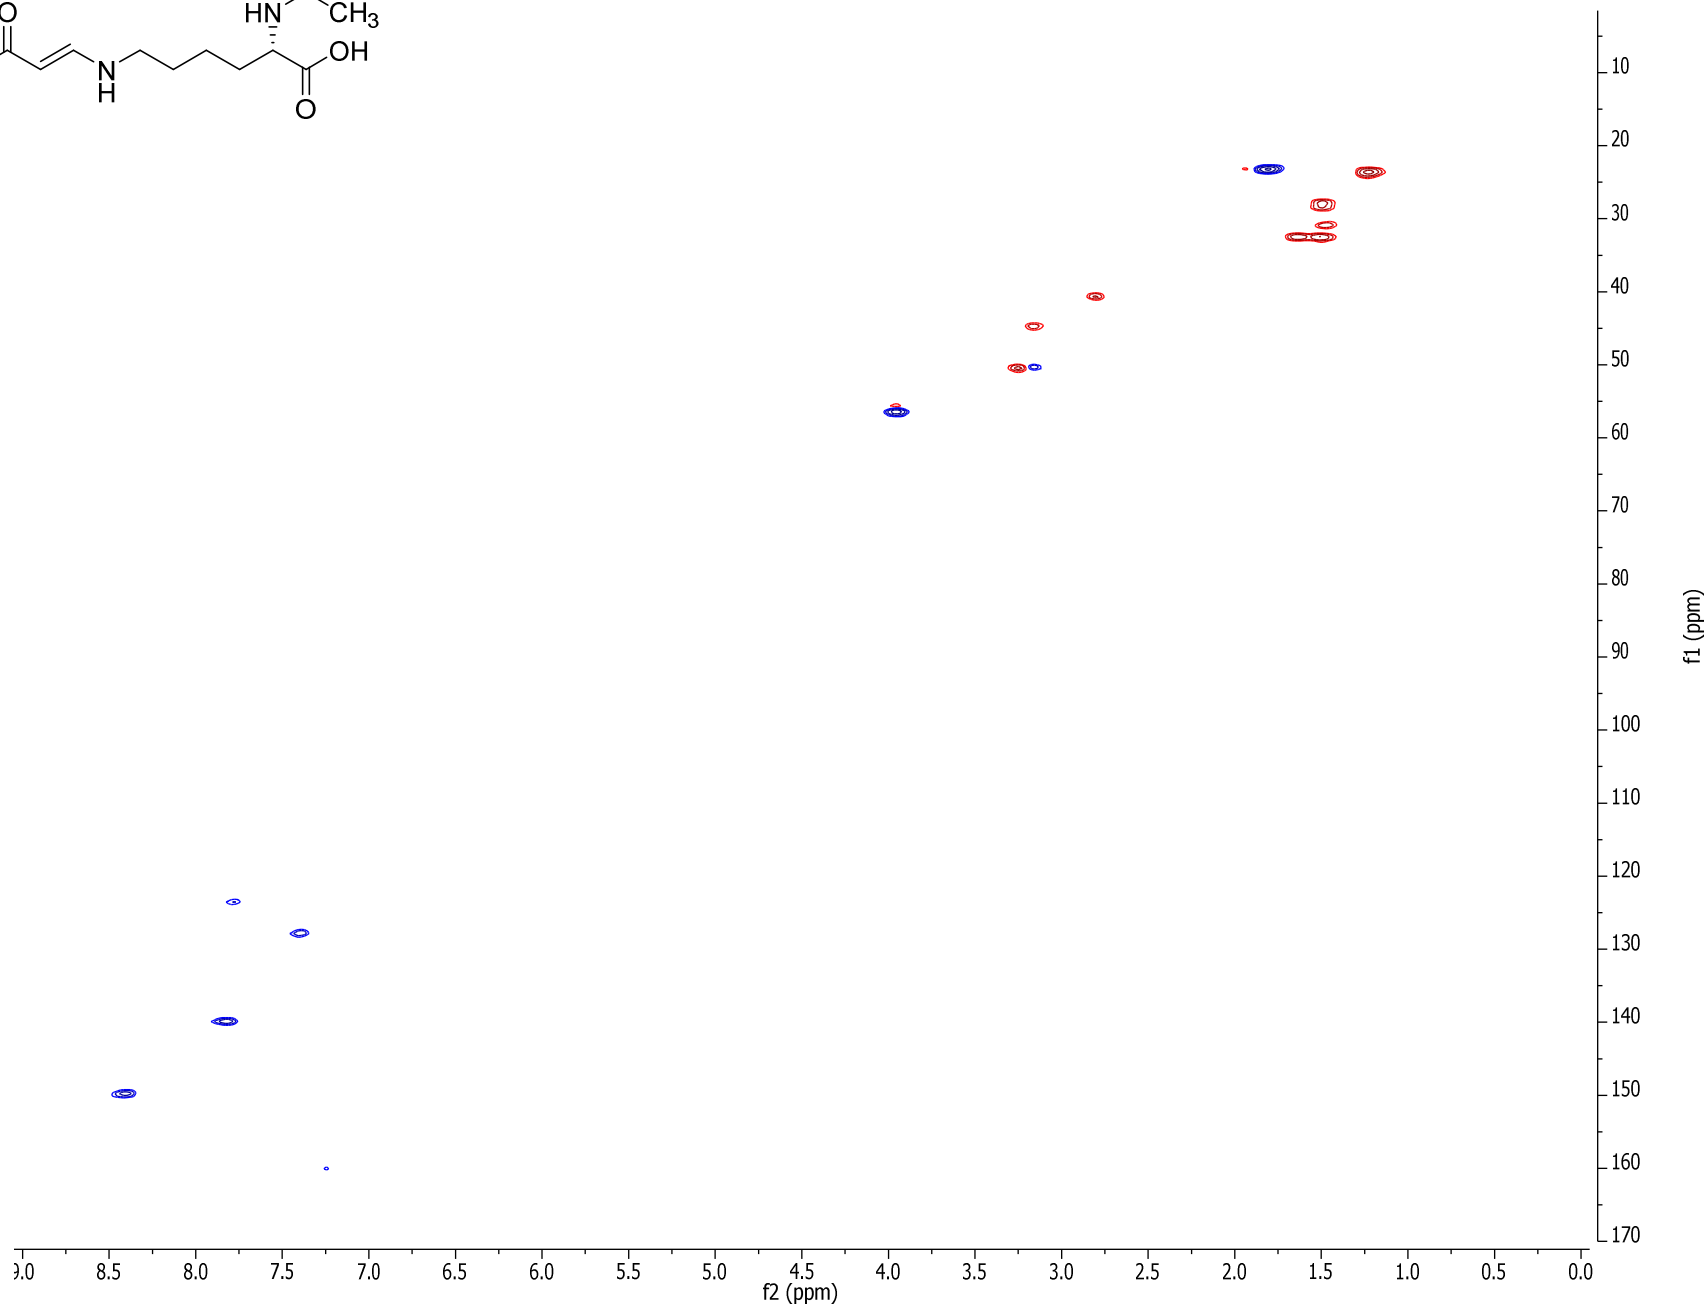

HMBC NMR (500 MHz, phosphate-buffered D<sub>2</sub>O) of **8**

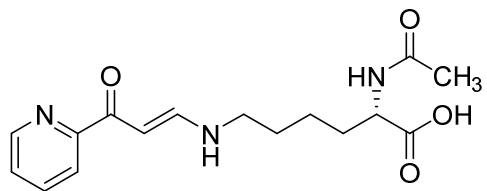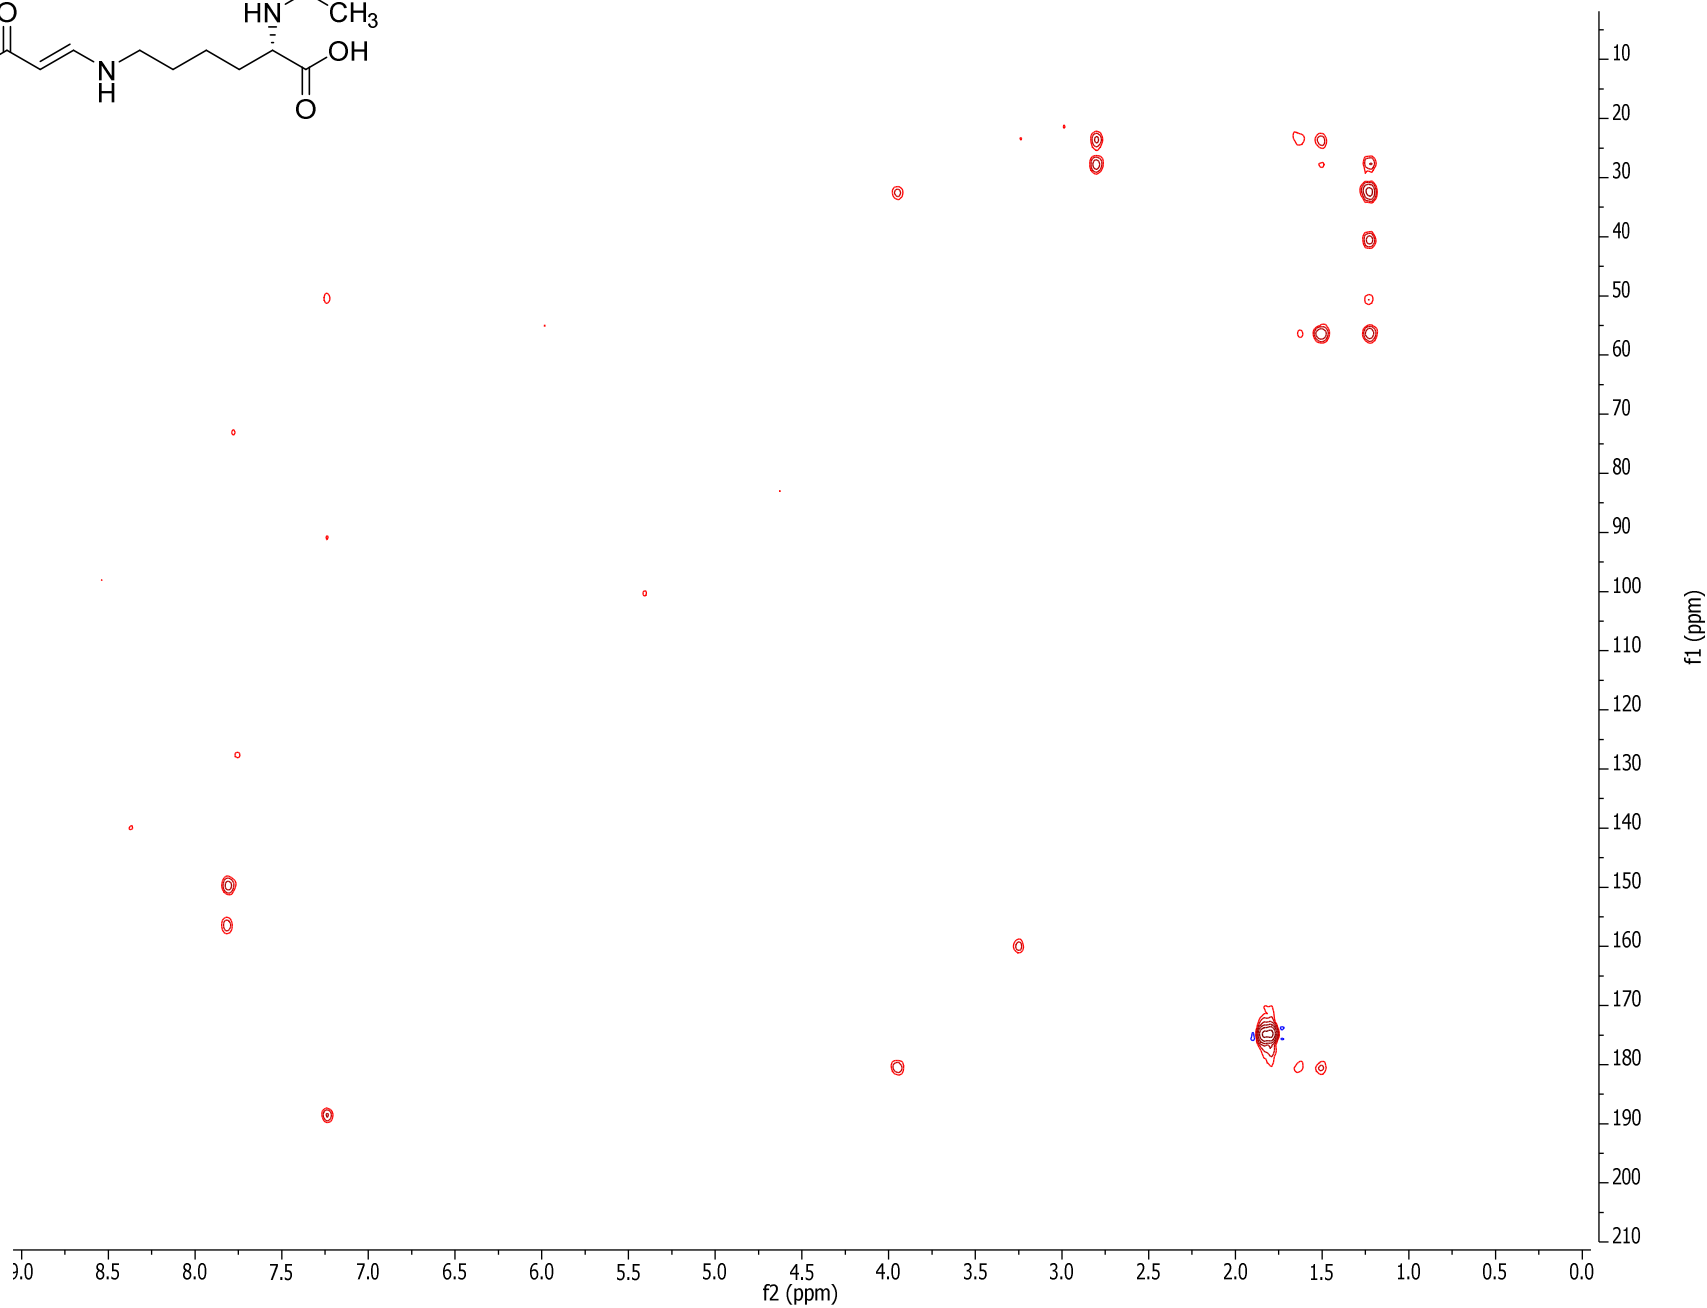



<sup>1</sup>H NMR (500 MHz, phosphate-buffered D<sub>2</sub>O) spectrum of **6** and hydrolysis product **9**

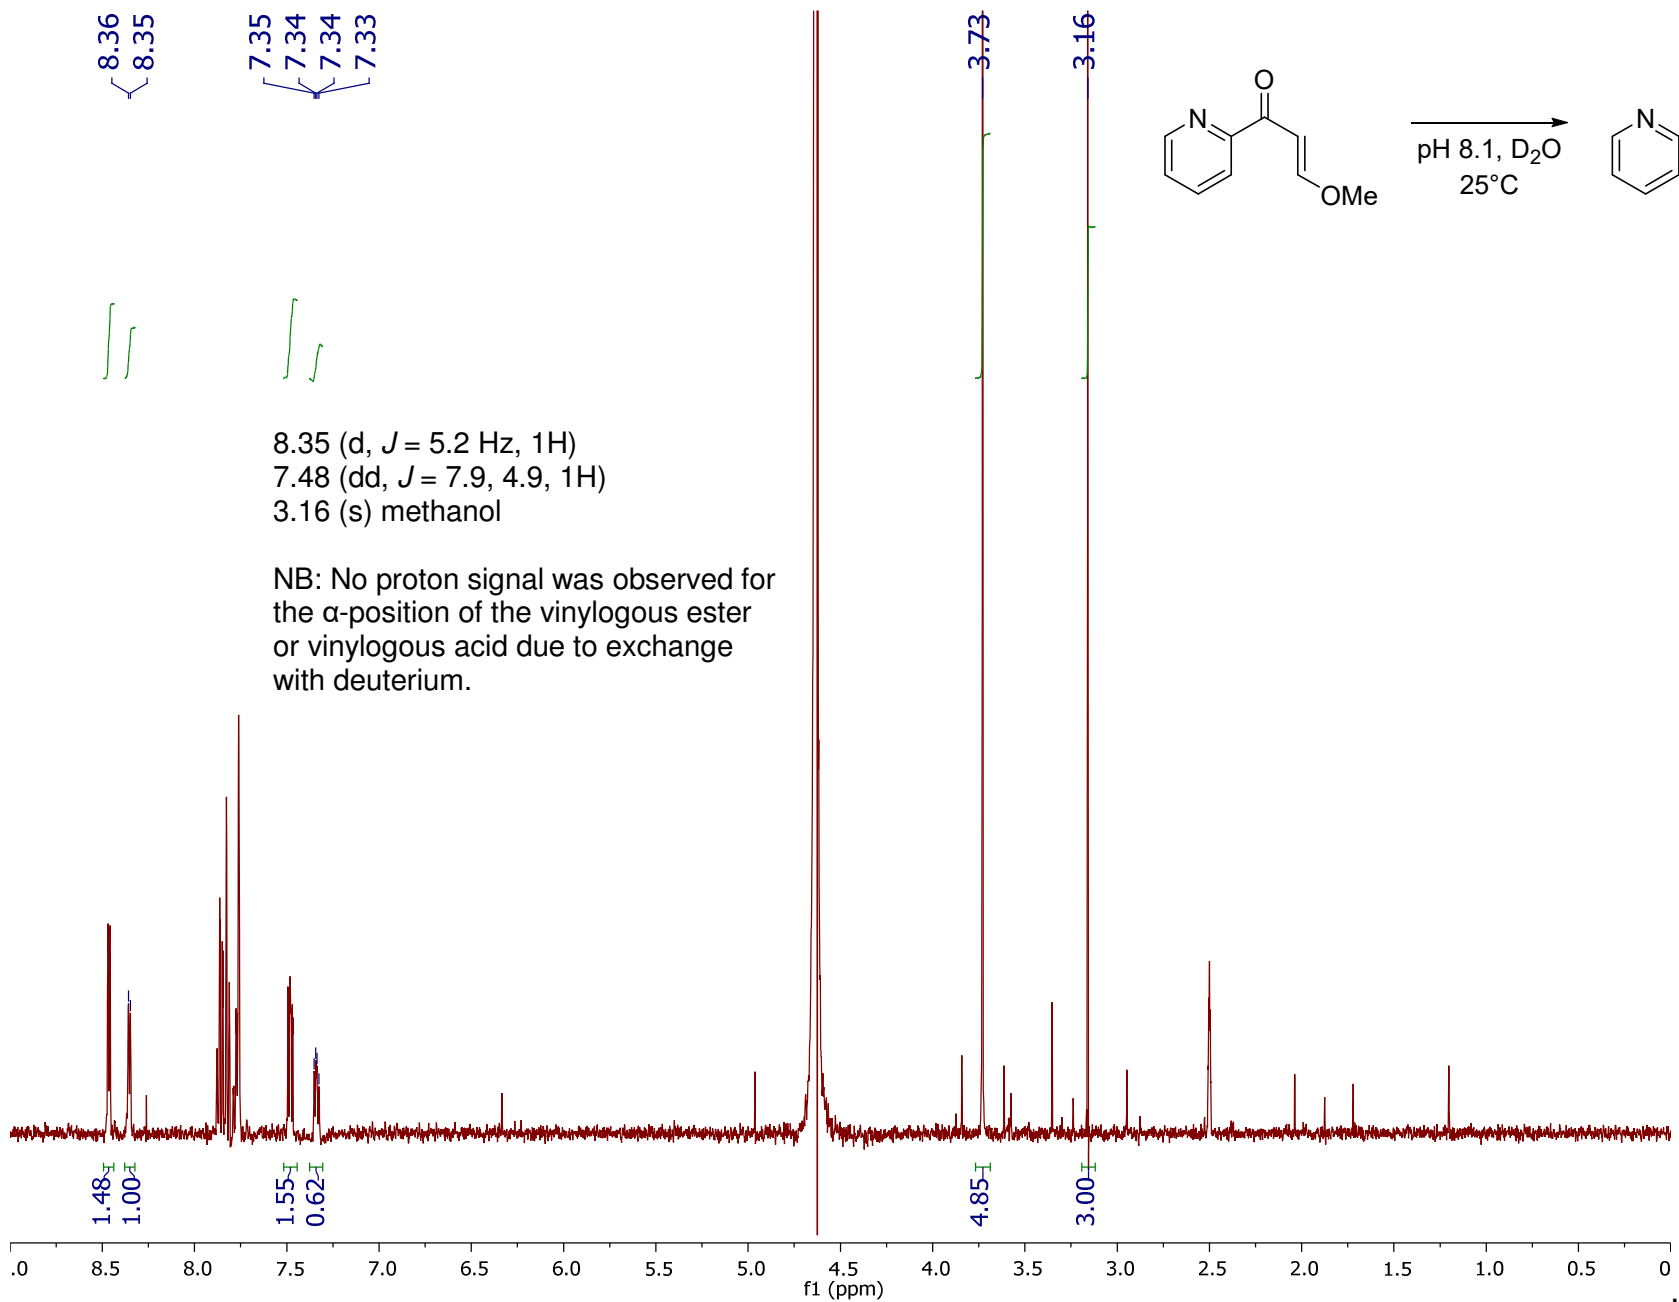

**Table S10.** Results of competition binding assay for neolymphostin against a panel of 97 kinases

| Target                     | Neolymphostin A |
|----------------------------|-----------------|
| Gene Symbol                | %Ctrl @ 1000nM  |
| ABL1(E255K)-phosphorylated | 70              |
| ABL1(T315I)-phosphorylated | 75              |
| ABL1-nonphosphorylated     | 39              |
| ABL1-phosphorylated        | 76              |
| ACVR1B                     | 96              |
| ADCK3                      | 87              |
| AKT1                       | 100             |
| AKT2                       | 97              |
| ALK                        | 100             |
| AURKA                      | 1.5             |
| AURKB                      | 1.9             |
| AXL                        | 39              |
| BMPR2                      | 57              |
| BRAF                       | 77              |
| BRAF(V600E)                | 77              |
| BTK                        | 15              |
| CDK11                      | 59              |
| CDK2                       | 87              |
| CDK3                       | 96              |
| CDK7                       | 50              |
| CDK9                       | 89              |
| CHEK1                      | 88              |
| CSF1R                      | 82              |
| CSNK1D                     | 75              |
| CSNK1G2                    | 33              |
| DCAMKL1                    | 83              |
| DYRK1B                     | 80              |
| EGFR                       | 58              |
| EGFR(L858R)                | 57              |
| EPHA2                      | 96              |
| ERBB2                      | 28              |
| ERBB4                      | 90              |
| ERK1                       | 90              |
| FAK                        | 98              |
| FGFR2                      | 94              |
| FGFR3                      | 91              |
| FLT3                       | 74              |
| GSK3B                      | 89              |
| IGF1R                      | 96              |
| IKK-alpha                  | 78              |
| IKK-beta                   | 83              |
| INSR                       | 93              |
| JAK2(JH1domain-catalytic)  | 62              |
| JAK3(JH1domain-catalytic)  | 18              |
| JNK1                       | 0.25            |
| JNK2                       | 0.15            |
| JNK3                       | 0.2             |
| KIT                        | 84              |
| KIT(D816V)                 | 91              |

%Ctrl Legend:

|                 |                 |                 |                  |             |
|-----------------|-----------------|-----------------|------------------|-------------|
| $0 \leq x < .1$ | $.1 \leq x < 1$ | $1 \leq x < 10$ | $10 \leq x < 35$ | $x \geq 35$ |
|-----------------|-----------------|-----------------|------------------|-------------|

**Table S10.** (continued)

| Target                     | Neolymphostin A |
|----------------------------|-----------------|
| Gene Symbol                | %Ctrl @ 1000nM  |
| KIT(V559D,T670I)           | 73              |
| LKB1                       | 93              |
| MAP3K4                     | 88              |
| MAPKAPK2                   | 98              |
| MARK3                      | 100             |
| MEK1                       | 10              |
| MEK2                       | 12              |
| MET                        | 60              |
| MKNK1                      | 87              |
| MKNK2                      | 97              |
| MLK1                       | 8               |
| p38-alpha                  | 100             |
| p38-beta                   | 100             |
| PAK1                       | 100             |
| PAK2                       | 98              |
| PAK4                       | 100             |
| PCK1                       | 70              |
| PDGFRA                     | 61              |
| PDGFRB                     | 95              |
| PDPK1                      | 100             |
| PIK3C2B                    | 0               |
| PIK3CA                     | 0               |
| PIK3CG                     | 0.55            |
| PIM1                       | 100             |
| PIM2                       | 100             |
| PIM3                       | 91              |
| PKAC-alpha                 | 89              |
| PLK1                       | 100             |
| PLK3                       | 76              |
| PLK4                       | 0.95            |
| PRKCE                      | 18              |
| RAF1                       | 90              |
| RET                        | 86              |
| RIOK2                      | 41              |
| ROCK2                      | 93              |
| RSK2(Kin.Dom.1-N-terminal) | 6.1             |
| SNARK                      | 27              |
| SRC                        | 89              |
| SRPK3                      | 69              |
| TGFBR1                     | 97              |
| TIE2                       | 61              |
| TRKA                       | 12              |
| TSSK1B                     | 93              |
| TYK2(JH1domain-catalytic)  | 60              |
| ULK2                       | 75              |
| VEGFR2                     | 68              |
| YANK3                      | 99              |
| ZAP70                      | 72              |

%Ctrl Legend:

|        |        |        |         |      |
|--------|--------|--------|---------|------|
| 0≤x<.1 | .1≤x<1 | 1≤x<10 | 10≤x<35 | x≥35 |
|--------|--------|--------|---------|------|

**Figure S12.** TREEspot™ interaction map for neolymphostin A @ 1000nM

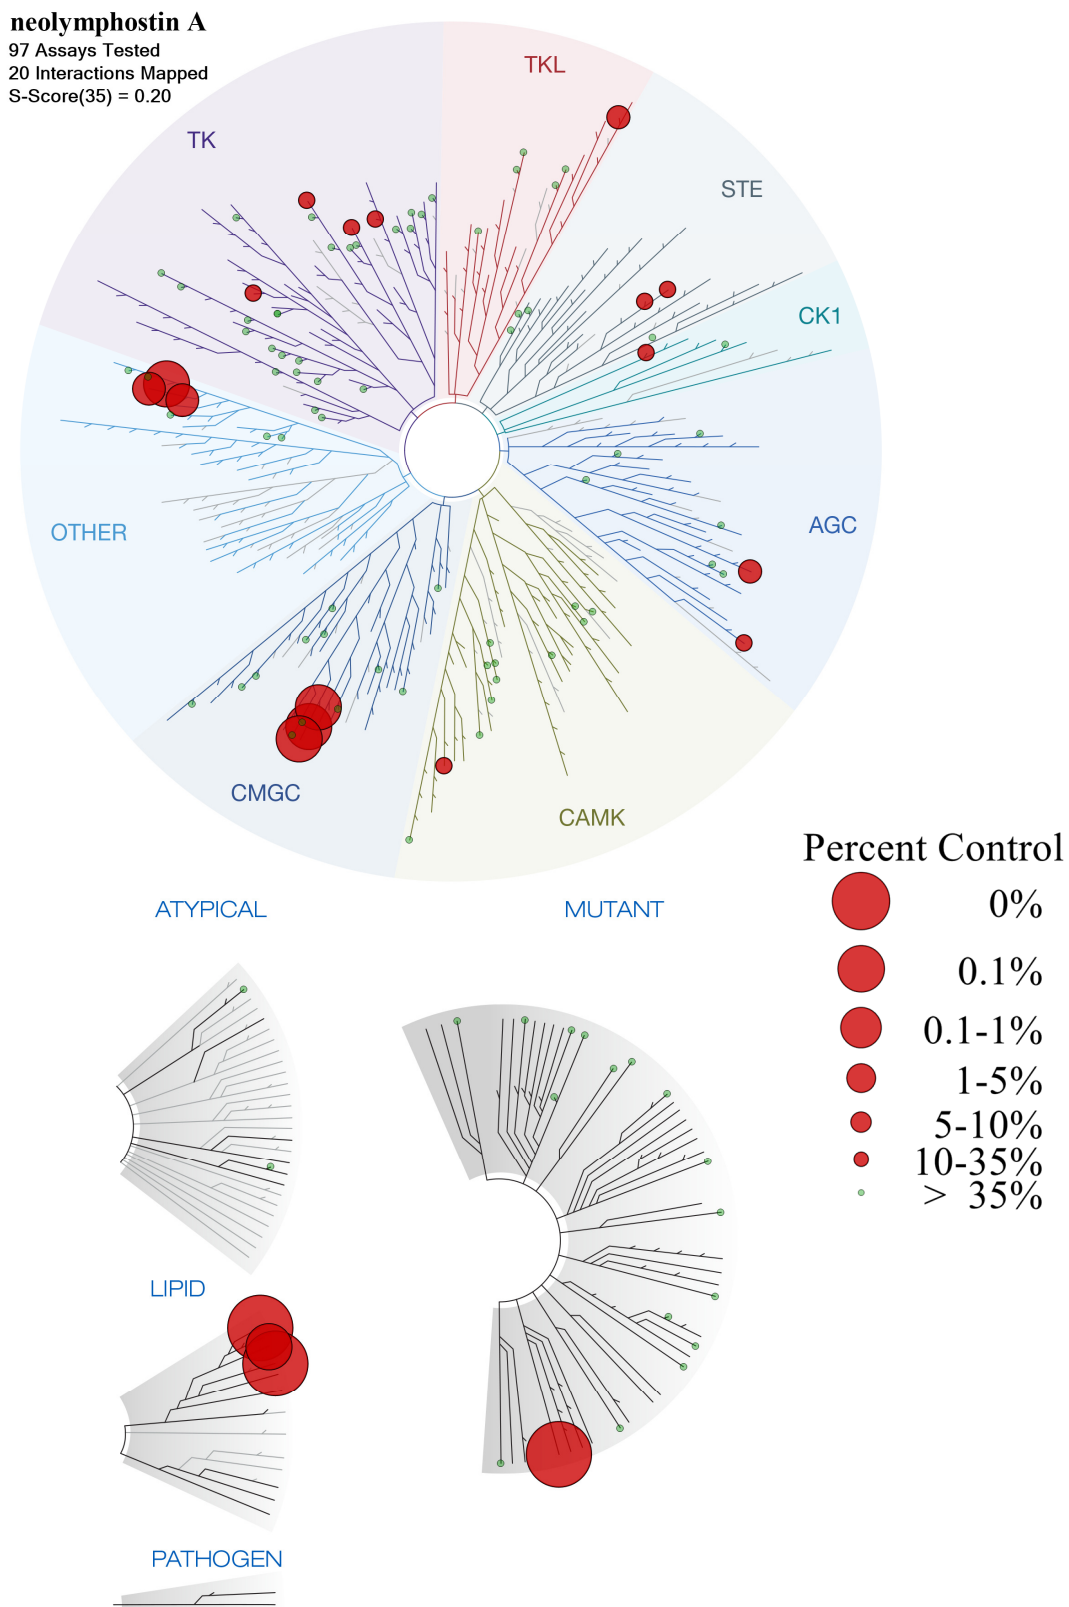

TREEspot™ is a proprietary data visualization software tool developed by KINOMEscan. Kinases found to bind are marked with red circles, where larger circles indicate higher-affinity binding

**Table S11.** Selectivity S-Score for neolymphostin A against a 97 kinase panel

| Compound Name   | Selectivity Score Type | Number of Hits | Number of Non-Mutant Kinases | Screening Concentration (nM) | Selectivity Score |
|-----------------|------------------------|----------------|------------------------------|------------------------------|-------------------|
| Neolymphostin A | S(35)                  | 20             | 90                           | 1000                         | 0.222             |
| Neolymphostin A | S(10)                  | 11             | 90                           | 1000                         | 0.122             |
| Neolymphostin A | S(1)                   | 7              | 90                           | 1000                         | 0.078             |

Selectivity S35-Score for 38 kinase inhibitors against a panel of 287 kinases

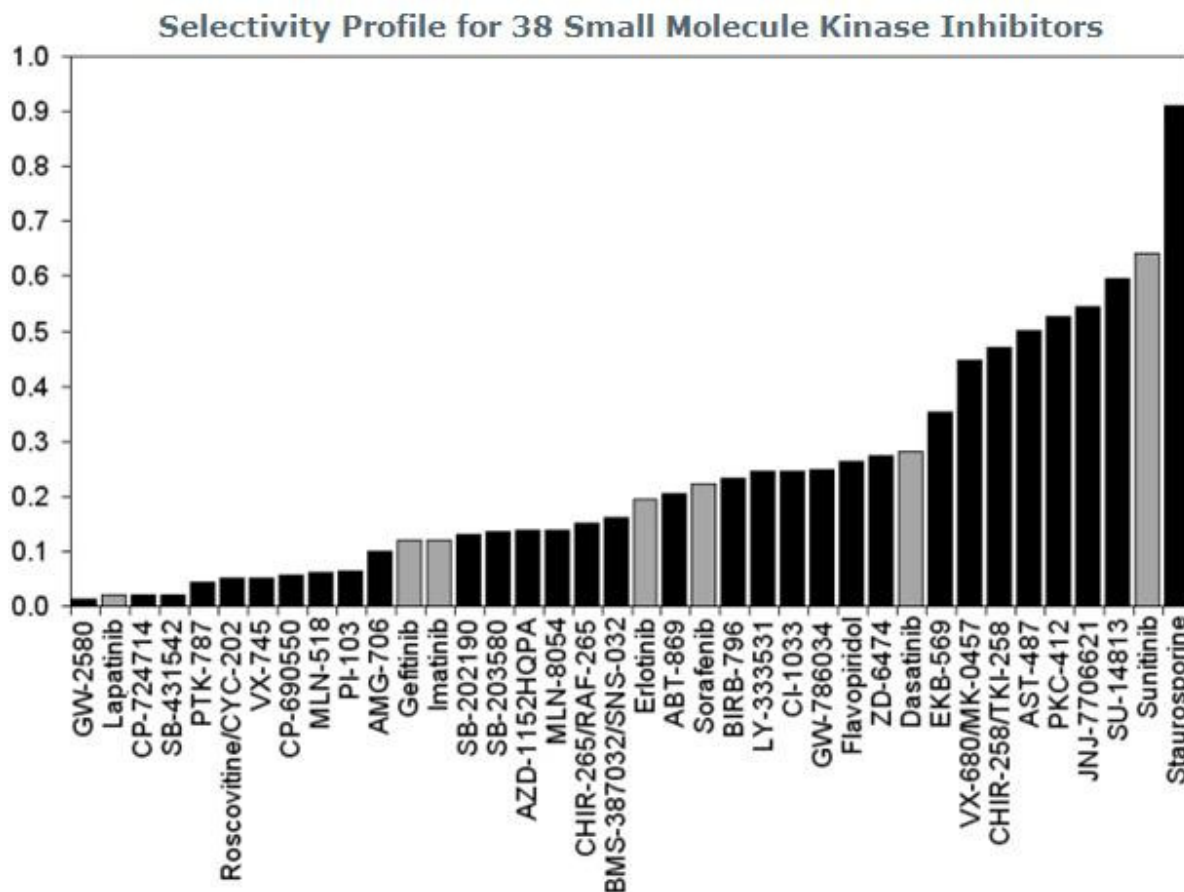

KINOMEScan's in vitro competition binding assay was used to evaluate 38 kinase inhibitors against a panel of 287 distinct human protein kinases (~55% of the predicted human protein kinome), and three lipid kinases. The compounds tested included 21 tyrosine kinase inhibitors, 15 serine-threonine kinase inhibitors, 1 lipid kinase inhibitor and staurosporine.  $S(35) = (\text{number of non-mutant kinases with } \%Ctrl < 35) / (290 \text{ kinases tested}; 27 \text{ mutant variants were excluded from this analysis})$ . Compounds approved for use in humans (as of August, 2007) are highlighted (gray bars).

**Figure S13.** NCI 60-cell line dose response curves for neolymphostin A

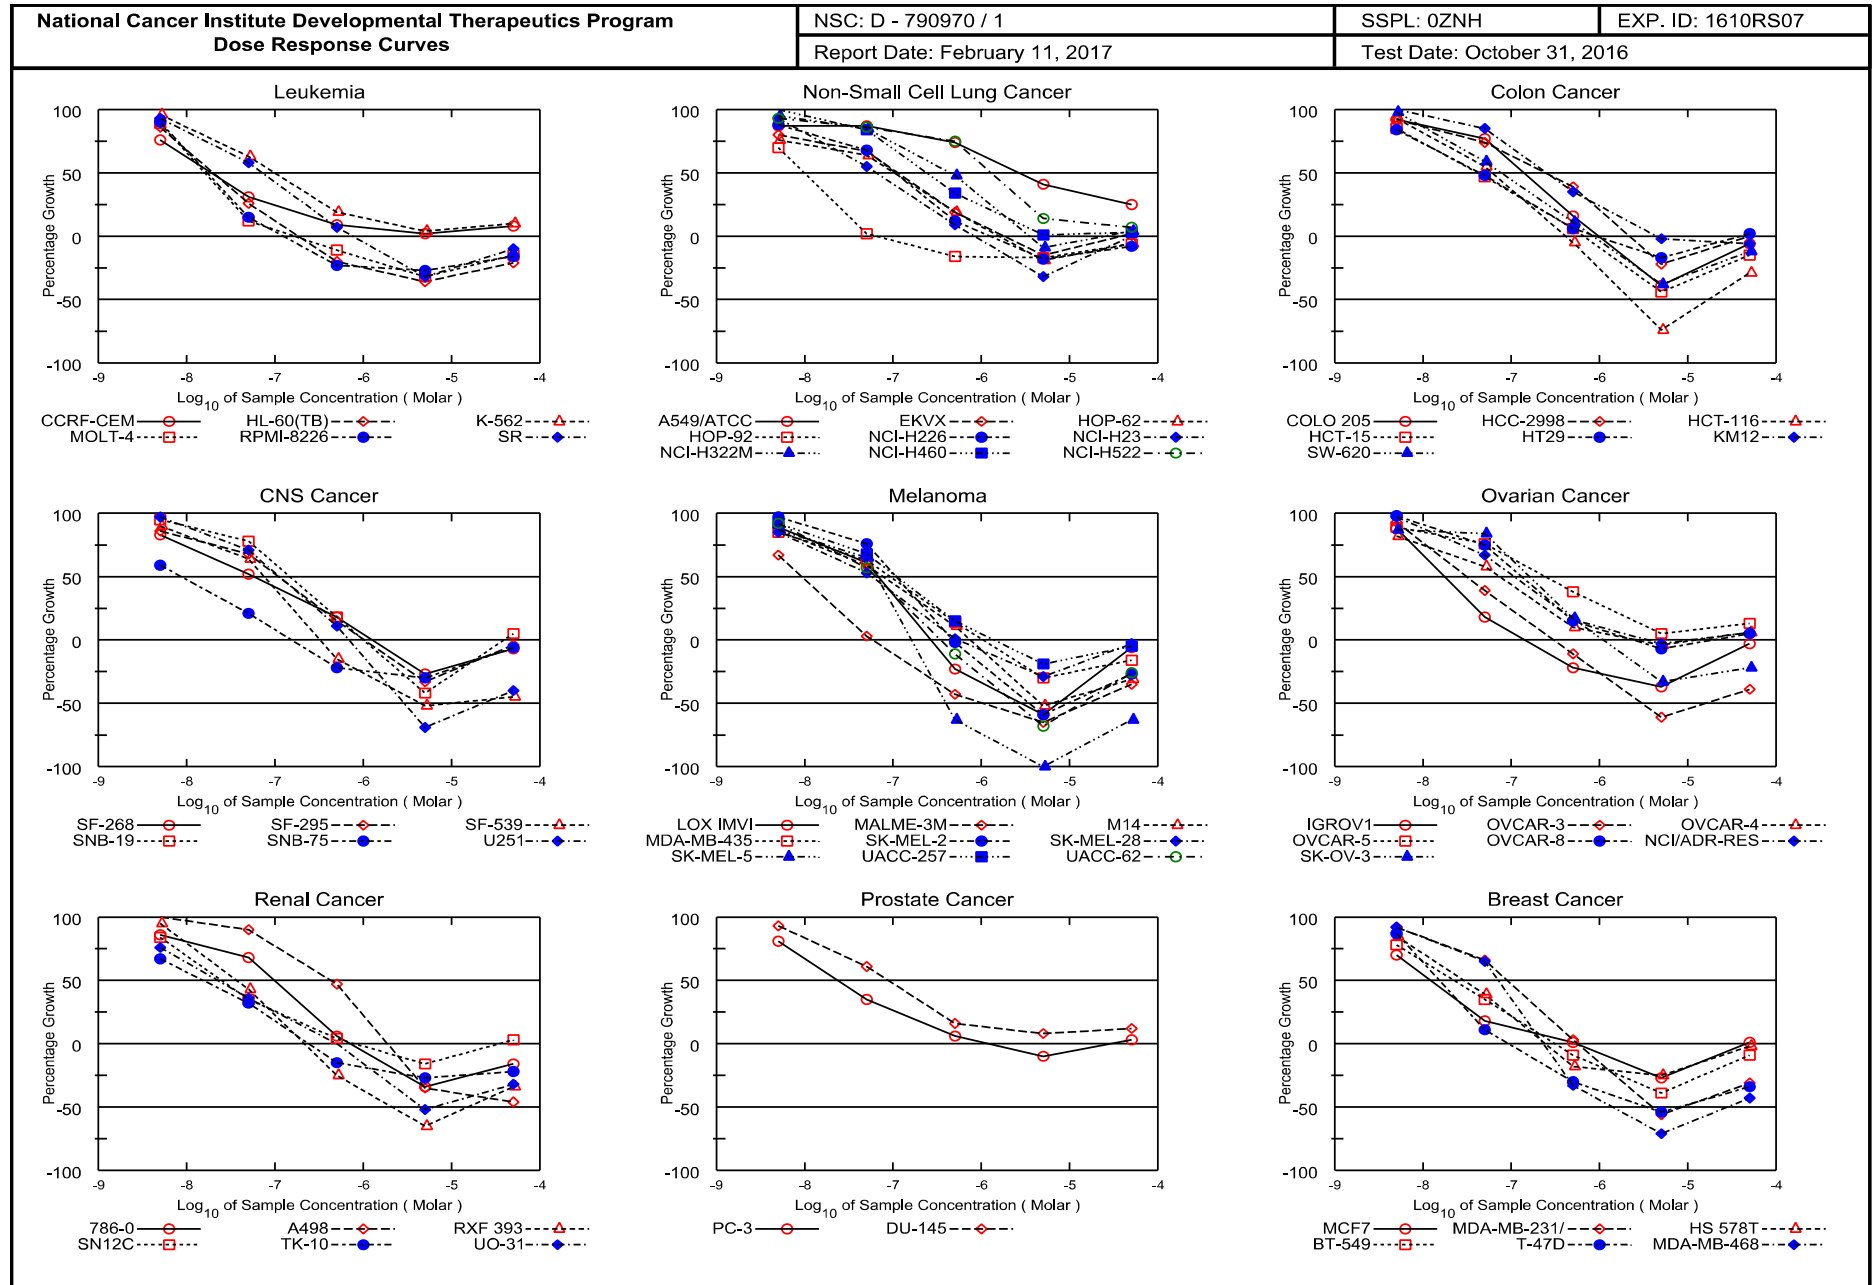



Figure S15. NCI 60-cell line mean graphs for neolymphostin A

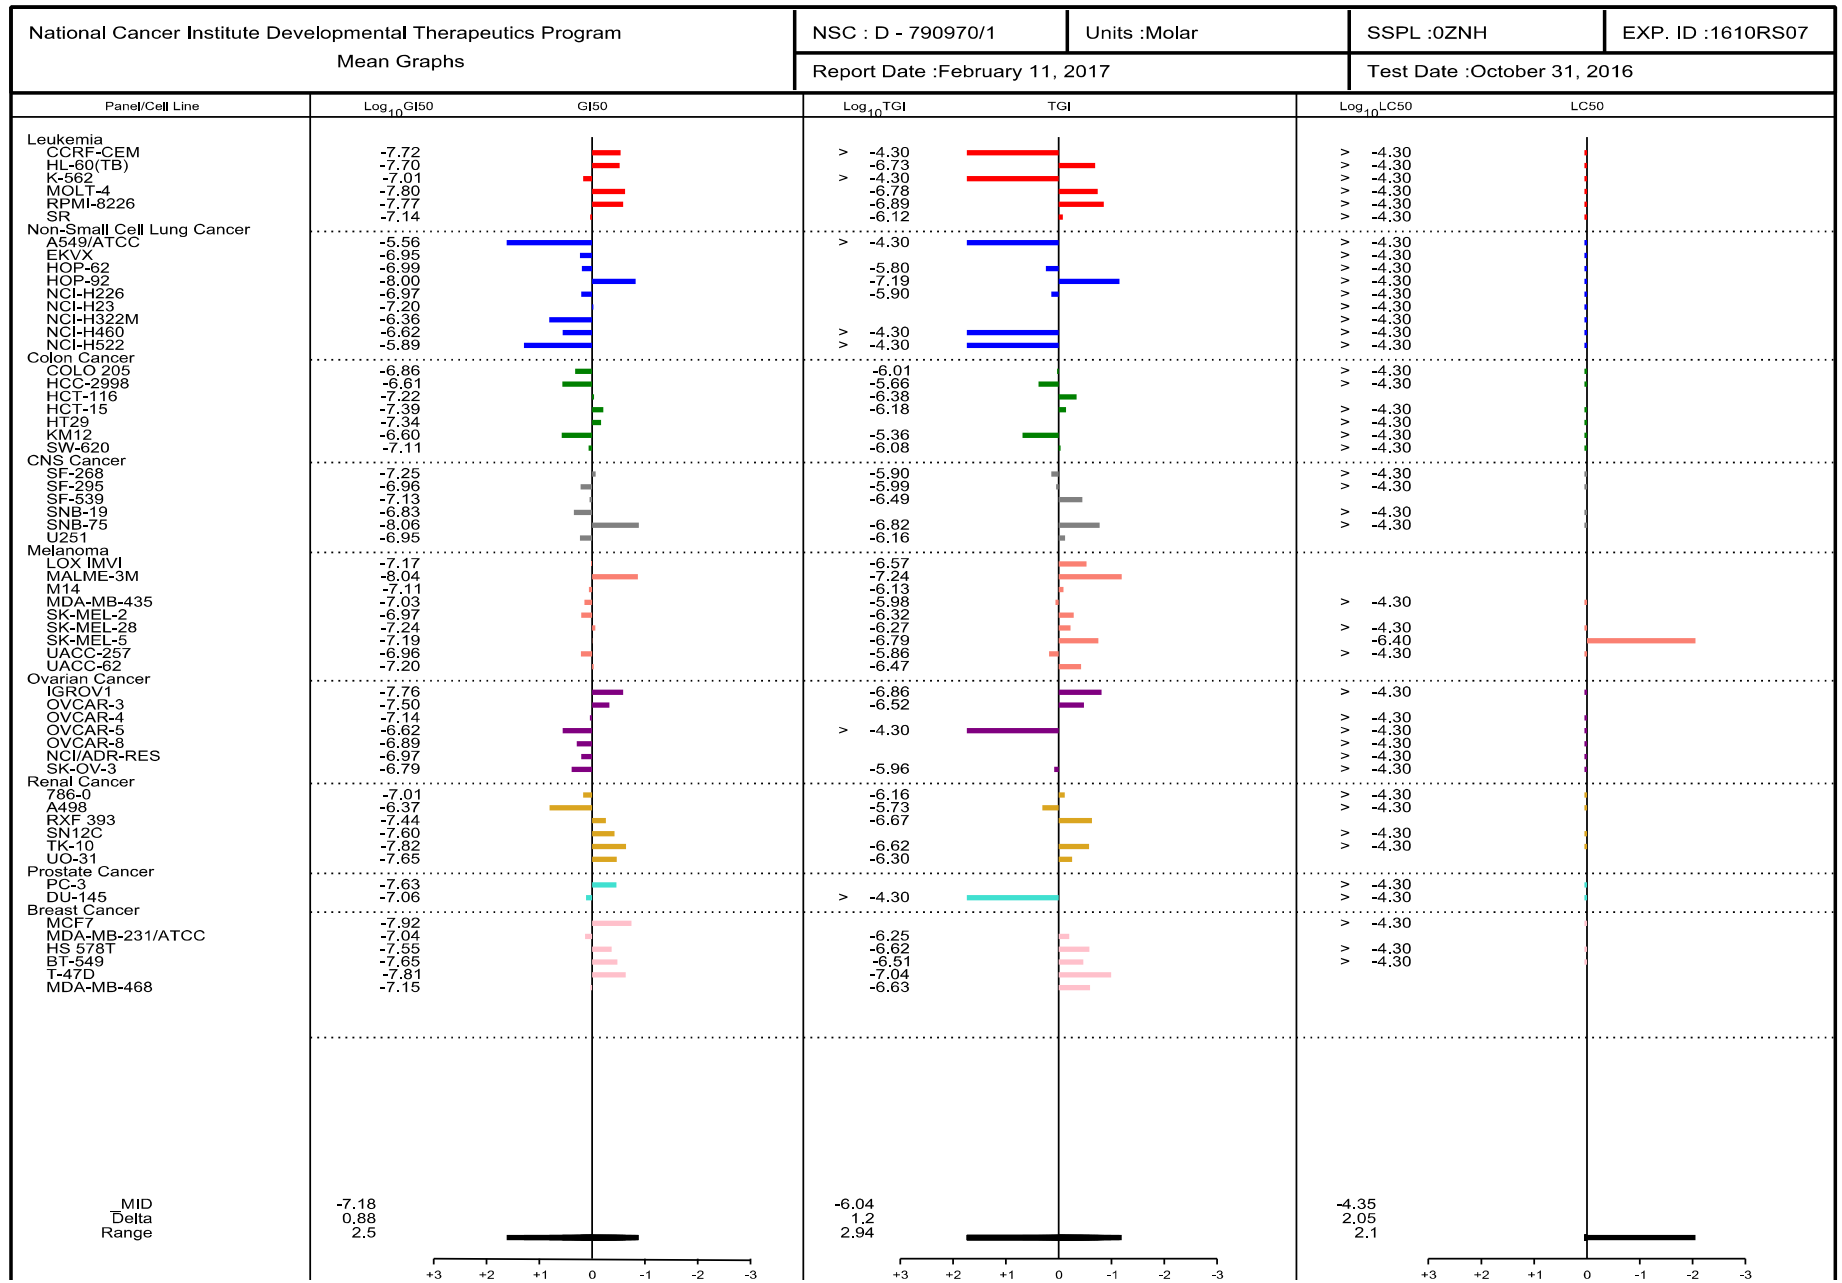



Figure S16. NCI 60-cell line dose response curves for neolymphostin A (all)

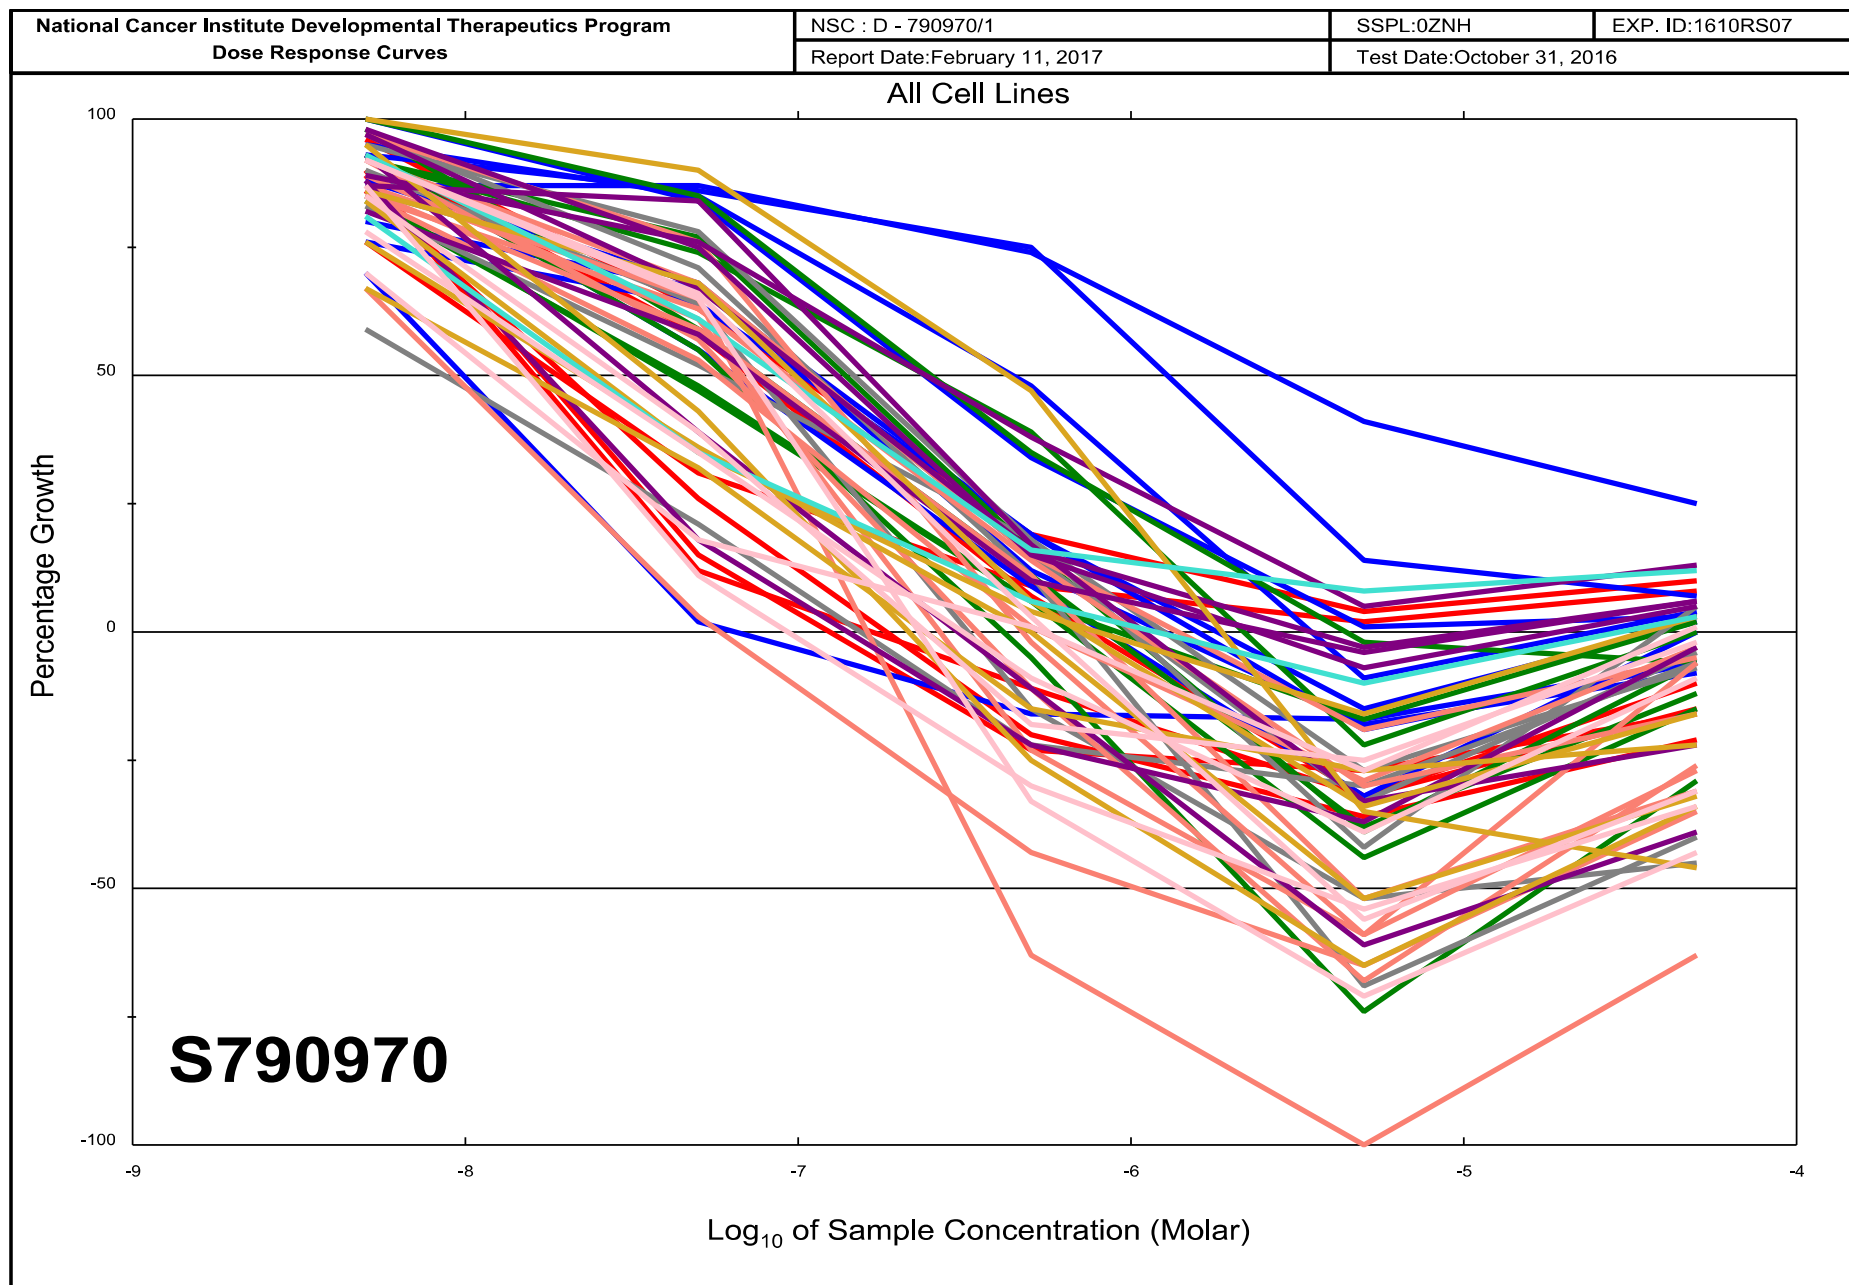

# Figure S17. COMPARE results

## Compare results

### STANDARD COMPARE Job Parameters

One item found.

1

| Job Id              | Status   | Seed Vector descriptor For Display | Target Set Name      | Minimum Standard Deviation | Minimum Correlation | Count Results To Return | Count Results To Return |
|---------------------|----------|------------------------------------|----------------------|----------------------------|---------------------|-------------------------|-------------------------|
| 3795231143875657337 | COMPLETE | NEOLYMPHOSTIN A                    | STANDARD_AGENTS_GI50 | 0.05                       | 0.2                 | 50                      | 50                      |

### STANDARD COMPARE Results

You can download the table below by using the buttons below the table.  
 Select/deselect all results on this page: [Select/Deselect All](#)  
 Crosstabulate the cell line data for the seed and target for the results selected below: [Crosstabulate test Results for selected vectors](#)  
 Use overlapping mean graphs to show the cell line data for the seed and target for the results selected below: [Graph test Results for selected vectors](#)  
 Graph gene distributions: [Select to graph distribution](#)

53 items found, displaying all items.

1

| Rank                     | Correlation | namecode | EXTERNAL LINKS | Seed Vector Ident For Display                                                                                                                                | Seed Vector descriptor For Display                        | Target Vector ident For Display | Target Vector descriptor For Display                      | Count Common Cell Lines | Seed Standard Deviation | Target Standard Deviation |       |
|--------------------------|-------------|----------|----------------|--------------------------------------------------------------------------------------------------------------------------------------------------------------|-----------------------------------------------------------|---------------------------------|-----------------------------------------------------------|-------------------------|-------------------------|---------------------------|-------|
| <input type="checkbox"/> | 1           | 0.445    | PUBLIC         | 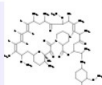<br><a href="#">DTP - chemical data</a><br><a href="#">DTP - all data</a>   | NSC-S790970<br>Endpt:GI50<br>Expld:AVGDATA<br>hiConc:-4.3 | NEOLYMPHOSTIN A                 | NSC-S226080<br>Endpt:GI50<br>Expld:AVGDATA<br>hiConc:-3.0 | rapamycin               | 58                      | 0.461                     | 1.182 |
| <input type="checkbox"/> | 2           | 0.429    | PUBLIC         | <br><a href="#">DTP - chemical data</a><br><a href="#">DTP - all data</a>   | NSC-S790970<br>Endpt:GI50<br>Expld:AVGDATA<br>hiConc:-4.3 | NEOLYMPHOSTIN A                 | NSC-S280594<br>Endpt:GI50<br>Expld:AVGDATA<br>hiConc:-3.3 | tricirbine phosphate    | 58                      | 0.461                     | 0.864 |
| <input type="checkbox"/> | 3           | 0.425    | PUBLIC         | <br><a href="#">DTP - chemical data</a><br><a href="#">DTP - all data</a> | NSC-S790970<br>Endpt:GI50<br>Expld:AVGDATA<br>hiConc:-4.3 | NEOLYMPHOSTIN A                 | NSC-S280594<br>Endpt:GI50<br>Expld:AVGDATA<br>hiConc:-2.3 | tricirbine phosphate    | 58                      | 0.461                     | 0.919 |
| <input type="checkbox"/> | 4           | 0.419    | PUBLIC         | <br><a href="#">DTP - chemical data</a><br><a href="#">DTP - all data</a> | NSC-S790970<br>Endpt:GI50<br>Expld:AVGDATA<br>hiConc:-4.3 | NEOLYMPHOSTIN A                 | NSC-S280594<br>Endpt:GI50<br>Expld:AVGDATA<br>hiConc:-4.0 | tricirbine phosphate    | 51                      | 0.477                     | 0.647 |
| <input type="checkbox"/> | 5           | 0.389    | PUBLIC         | <br><a href="#">DTP - chemical data</a><br><a href="#">DTP - all data</a> | NSC-S790970<br>Endpt:GI50<br>Expld:AVGDATA<br>hiConc:-4.3 | NEOLYMPHOSTIN A                 | NSC-S226080<br>Endpt:GI50<br>Expld:AVGDATA<br>hiConc:-4.0 | rapamycin               | 59                      | 0.457                     | 0.917 |

Figure S17. COMPARE results (continued)

|                          |    |       |        |                                                                                                                                                            |                                                           |                    |                                                           |                              |    |       |       |
|--------------------------|----|-------|--------|------------------------------------------------------------------------------------------------------------------------------------------------------------|-----------------------------------------------------------|--------------------|-----------------------------------------------------------|------------------------------|----|-------|-------|
| <input type="checkbox"/> | 6  | 0.378 | PUBLIC | <br><a href="#">DTP - chemical data</a><br><a href="#">DTP - all data</a> | NSC:S790970<br>Endpt:GI50<br>Expld:AVGDATA<br>hiConc:-4.3 | NEOLYMPHOSTIN<br>A | NSC:S73754<br>Endpt:GI50<br>Expld:AVGDATA<br>hiConc:-2.9  | fluorodopan                  | 43 | 0.492 | 0.195 |
| <input type="checkbox"/> | 7  | 0.367 | PUBLIC | <br><a href="#">DTP - chemical data</a><br><a href="#">DTP - all data</a> | NSC:S790970<br>Endpt:GI50<br>Expld:AVGDATA<br>hiConc:-4.3 | NEOLYMPHOSTIN<br>A | NSC:S226080<br>Endpt:GI50<br>Expld:AVGDATA<br>hiConc:-7.0 | rapamycin                    | 59 | 0.457 | 0.778 |
| <input type="checkbox"/> | 8  | 0.358 | PUBLIC | <br><a href="#">DTP - chemical data</a><br><a href="#">DTP - all data</a> | NSC:S790970<br>Endpt:GI50<br>Expld:AVGDATA<br>hiConc:-4.3 | NEOLYMPHOSTIN<br>A | NSC:S253272<br>Endpt:GI50<br>Expld:AVGDATA<br>hiConc:-2.0 | caracemide                   | 58 | 0.461 | 0.336 |
| <input type="checkbox"/> | 9  | 0.356 | PUBLIC | <br><a href="#">DTP - chemical data</a><br><a href="#">DTP - all data</a> | NSC:S790970<br>Endpt:GI50<br>Expld:AVGDATA<br>hiConc:-4.3 | NEOLYMPHOSTIN<br>A | NSC:S167780<br>Endpt:GI50<br>Expld:AVGDATA<br>hiConc:-3.9 | asaley                       | 58 | 0.461 | 0.431 |
| <input type="checkbox"/> | 10 | 0.337 | PUBLIC | <br><a href="#">DTP - chemical data</a><br><a href="#">DTP - all data</a> | NSC:S790970<br>Endpt:GI50<br>Expld:AVGDATA<br>hiConc:-4.3 | NEOLYMPHOSTIN<br>A | NSC:S291643<br>Endpt:GI50<br>Expld:AVGDATA<br>hiConc:-2.3 | pyrimidine-5-glycodialdehyde | 58 | 0.461 | 0.167 |
